# Supplementary material for: Complete mitochondrial genome of Syzygium samarangense reveals genomic recombination, gene transfer, and RNA editing events
Source: Frontiers journal article supplement (doi:10.3389/fpls.2023.1301164), 2024-01-09

|                                        |   |  |                                                                       |
|----------------------------------------|---|--|-----------------------------------------------------------------------|
|                                        |   |  | 102030405060                                                          |
|                                        |   |  | ATGTTTGAAAAATTTCCACGCCTCTTTTATTTGATGAAAATAGTCTGAATTCCAGTGCTACATCTT    |
| Syzygium_samarangense_contig1 (1>1158) | → |  | ATGTTTGAAAAATTTCCACGCCTCTTTTATTTGATGAAAATAGTCTGAATTCCAGTGCTACATCTT    |
|                                        |   |  | 708090100110120130                                                    |
|                                        |   |  | CTAGAACTCCGAGTCAATCCACGACGACTATTACCGATTATAGTCTTCAATCGTCCGATACTCAAGG   |
| Syzygium_samarangense_contig1 (1>1158) | → |  | CTAGAACTCCGAGTCAATCCACGACGACTATTACCGATTATAGTCTTCAATCGTCCGATACTCAAGG   |
|                                        |   |  | 140150160170180190200                                                 |
|                                        |   |  | TTCTTATGATGGTATTTTTGAGGATCATCCAGGTCTTAACCCCTTCCAGTGAACGTATAGTAGAGCTT  |
| Syzygium_samarangense_contig1 (1>1158) | → |  | TTCTTATGATGGTATTTTTGAGGATCATCCAGGTCTTAACCCCTTCCAGTGAACGTATAGTAGAGCTT  |
|                                        |   |  | 210220230240250260                                                    |
|                                        |   |  | CAATCTGATATACGCGAGAAATTGGAGGAGCTTCTGATTAACAAGAGTCCCACGAAGCTATGGTTG    |
| Syzygium_samarangense_contig1 (1>1158) | → |  | CAATCTGATATACGCGAGAAATTGGAGGAGCTTCTGATTAACAAGAGTCCCACGAAGCTATGGTTG    |
|                                        |   |  | 270280290300310320330                                                 |
|                                        |   |  | CGGCCGAAGCTTTACATGGGGAAAGCGACAATATCCCTTTTATGGAGTTCATTTTGAATGATTTGAA   |
| Syzygium_samarangense_contig1 (1>1158) | → |  | CGGCCGAAGCTTTACATGGGGAAAGCGACAATATCCCTTTTATGGAGTTCATTTTGAATGATTTGAA   |
|                                        |   |  | 340350360370380390400                                                 |
|                                        |   |  | CACAAACGGAGTAGAAAGTGAGTCCTATAAAGATGCGCTGGCAGCACTAGTGAAGATGGTCCCCAGC   |
| Syzygium_samarangense_contig1 (1>1158) | → |  | CACAAACGGAGTAGAAAGTGAGTCCTATAAAGATGCGCTGGCAGCACTAGTGAAGATGGTCCCCAGC   |
|                                        |   |  | 410420430440450460                                                    |
|                                        |   |  | CCACTTGAACAATTTGAAATCATCCCATTTTTTCCCTATGAAGATAGGAGACTTGTATTTCTCATTTCA |
| Syzygium_samarangense_contig1 (1>1158) | → |  | CCACTTGAACAATTTGAAATCATCCCATTTTTTCCCTATGAAGATAGGAGACTTGTATTTCTCATTTCA |
|                                        |   |  | 470480490500510520530                                                 |
|                                        |   |  | CAAATCCATCTTTGTTTATGCTGCTAACTCTCAGTTTGGTCTACTTCTGCTTTATTTTGTACTAA     |
| Syzygium_samarangense_contig1 (1>1158) | → |  | CAAATCCATCTTTGTTTATGCTGCTAACTCTCAGTTTGGTCTACTTCTGCTTTATTTTGTACTAA     |
|                                        |   |  | 540550560570580590600                                                 |
|                                        |   |  | AAAGGGAGGAGGAAACTCAGTACCAAATGCTTGGCAATCCTTGGTAGAGCTTATTTATGATTTTCGTG  |
| Syzygium_samarangense_contig1 (1>1158) | → |  | AAAGGGAGGAGGAAACTCAGTACCAAATGCTTGGCAATCCTTGGTAGAGCTTATTTATGATTTTCGTG  |
|                                        |   |  | 610620630640650660670                                                 |
|                                        |   |  | CTAAACCTGGTAAACGAACAAATAAGTGGTCTTTCCGGAAATGTGAAACAAAAGTTTTTCCCTTGCA   |
| Syzygium_samarangense_contig1 (1>1158) | → |  | CTAAACCTGGTAAACGAACAAATAAGTGGTCTTTCCGGAAATGTGAAACAAAAGTTTTTCCCTTGCA   |
|                                        |   |  | 680690700710720730                                                    |
|                                        |   |  | TATTGGTCACTTTTACTTTTTTCGTTATTTTCGTAATCCCAGGGTATGATACCTTATAGCTTCACAGT  |
| Syzygium_samarangense_contig1 (1>1158) | → |  | TATTGGTCACTTTTACTTTTTTCGTTATTTTCGTAATCCCAGGGTATGATACCTTATAGCTTCACAGT  |
|                                        |   |  | 740750760770780790800                                                 |
|                                        |   |  | TACAAGTCATTTTCTCATTACTTTGGGTCTCTCATTTTCTATTTTTATAGGCATTACTATAGTGGGA   |
| Syzygium_samarangense_contig1 (1>1158) | → |  | TACAAGTCATTTTCTCATTACTTTGGGTCTCTCATTTTCTATTTTTATAGGCATTACTATAGTGGGA   |
|                                        |   |  | 810820830840850860870                                                 |
|                                        |   |  | TTTCAAAGAAATGGGCTTCATTTTTTAAGCTTCTTATTACCCGCAGGAGTCCCAGTCCCGTTAGCAC   |
| Syzygium_samarangense_contig1 (1>1158) | → |  | TTTCAAAGAAATGGGCTTCATTTTTTAAGCTTCTTATTACCCGCAGGAGTCCCAGTCCCGTTAGCAC   |

880 890 900 910 920 930  
CTTTTCTAGTACTCCTTGAGC-T-A-A-TCCCTCATTGTTTTCGCGCATTAAAGCTCAGGAATACGTT

Syzygium samarangense contig1 (1>1158) → CTTTTCTAGTACTCCTTGAGC-T-A-A-TCCCTCATTGTTTTCGCGCATTAAAGCTCAGGAATACGTT  
gDNA-atp6-stop.ab1 (22>291) →

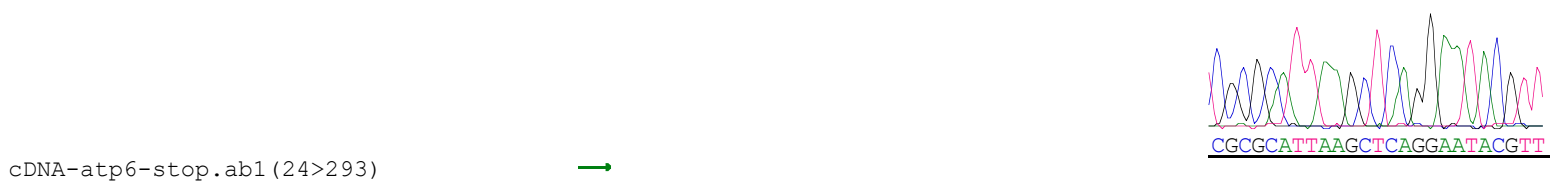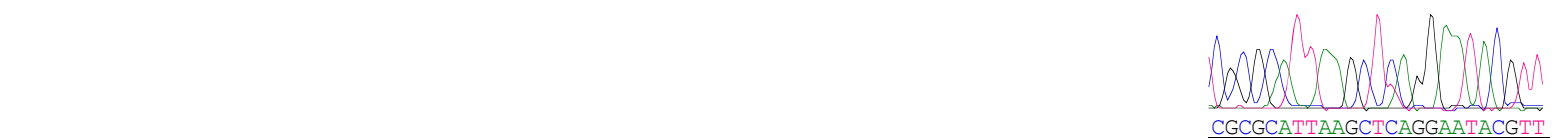

940 950 960 970 980 990 1000  
TATTTGCTAATATGATGGCCGGTCATAGTCCAGTAAAGATTTTAAGTGGGTCCGCTTGGACTATGCT

Syzygium samarangense contig1 (1>1158) → TATTTGCTAATATGATGGCCGGTCATAGTCCAGTAAAGATTTTAAGTGGGTCCGCTTGGACTATGCT  
gDNA-atp6-stop.ab1 (22>291) →

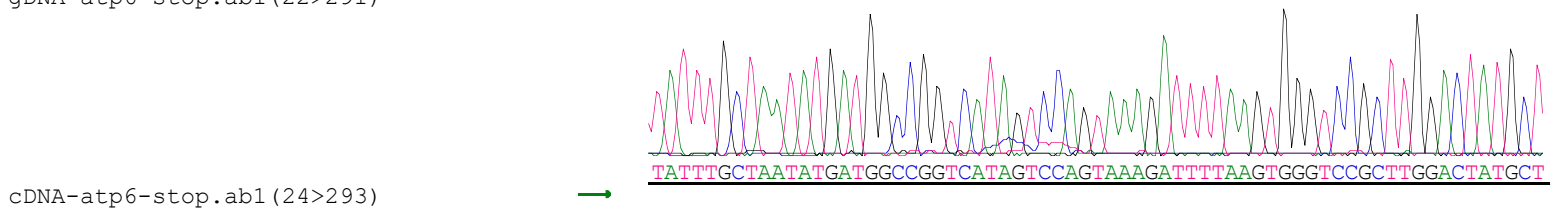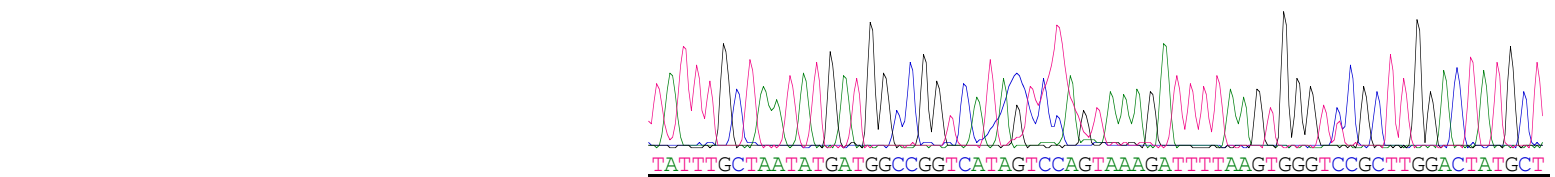

1010 1020 1030 1040 1050 1060 1070  
ATGTATGAATGATCTTTTCTATTTCATAGGGGATCTTGGTCCTTTATTTATAGTTCTTGCATTAAACC

Syzygium samarangense contig1 (1>1158) → ATGTATGAATGATCTTTTCTATTTCATAGGGGATCTTGGTCCTTTATTTATAGTTCTTGCATTAAACC  
gDNA-atp6-stop.ab1 (22>291) →

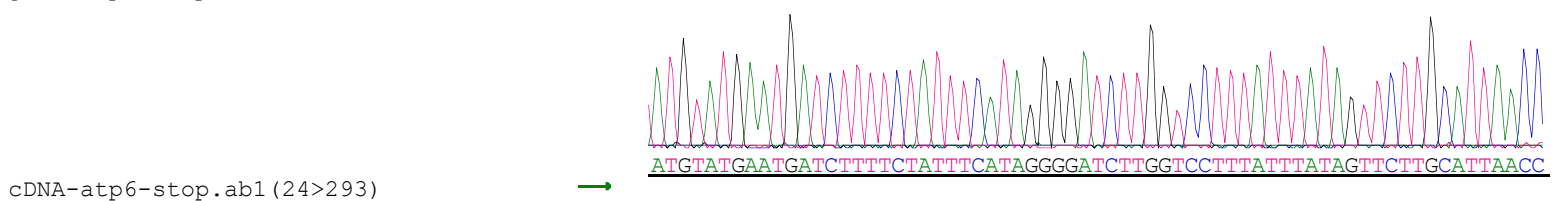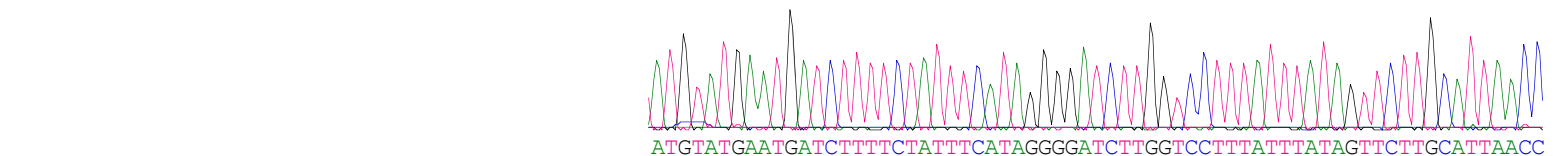

1080 1090 1100 1110 1120 1130  
GGTCCGGAATTAGGTGTAGCTATATCACAAGCTCATGTTTCTACGATCTCAATCTGTATTTACTTGA

Syzygium samarangense contig1 (1>1158) → GGTCCGGAATTAGGTGTAGCTATATCACAAGCTCATGTTTCTACGATCTCAATCTGTATTTACTTGA  
gDNA-atp6-stop.ab1 (22>291) →

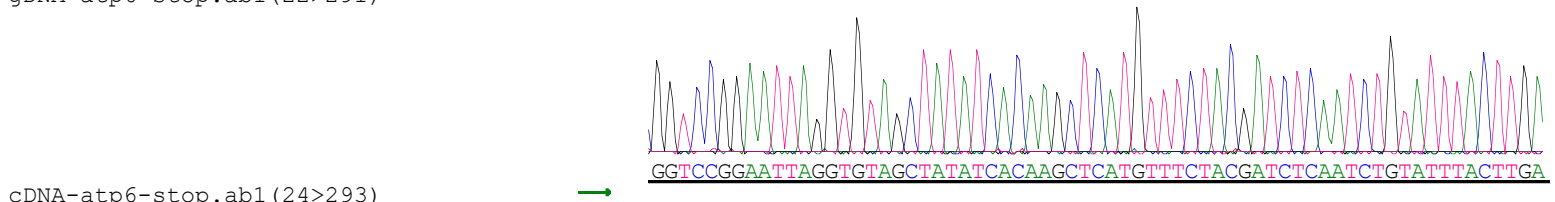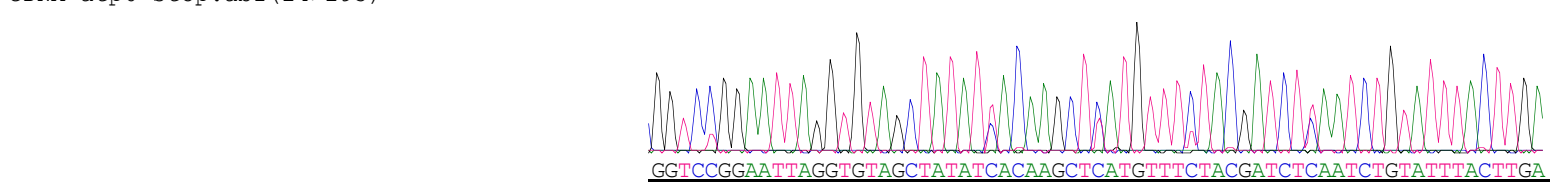

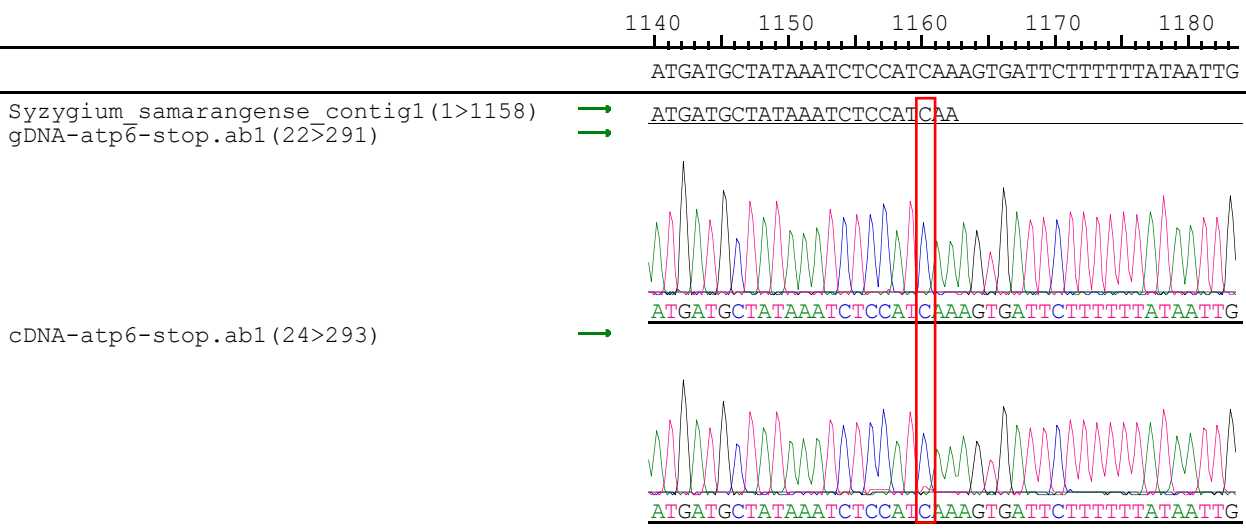

Supplement: Data_Sheet_1.zip [file Data_Sheet_1.zip]
