# Supplementary material for: Complete mitochondrial genome of Syzygium samarangense reveals genomic recombination, gene transfer, and RNA editing events
Source: Frontiers journal article supplement (doi:10.3389/fpls.2023.1301164), 2024-01-09

|                                        |   |                                                                       |
|----------------------------------------|---|-----------------------------------------------------------------------|
|                                        |   | 102030405060                                                          |
|                                        |   | ATGGTCCAAC TACATAACTTTTCTTTTTCATTACTTCCATGGTCGTCGCTCGTGGCACGGCAGCAC   |
| Syzygium_samarangense_contig1 (1>1317) | → | ATGGTCCAAC TACATAACTTTTCTTTTTCATTACTTCCATGGTCGTCGCTCGTGGCACGGCAGCAC   |
|                                        |   | 708090100110120130                                                    |
|                                        |   | CCGTACTATTGAAATGGTTTCGT CAGTAGAGATGTTCCACAGGTGCCCTTCTTCCAATGGAAC TAT  |
| Syzygium_samarangense_contig1 (1>1317) | → | CCGTACTATTGAAATGGTTTCGT CAGTAGAGATGTTCCACAGGTGCCCTTCTTCCAATGGAAC TAT  |
|                                        |   | 140150160170180190200                                                 |
|                                        |   | AATTCCTATT CCTATCCCTTCATTCCCTCTTTTGGTCTATCTACATTCCAGGAAATTCATACGCTCC  |
| Syzygium_samarangense_contig1 (1>1317) | → | AATTCCTATT CCTATCCCTTCATTCCCTCTTTTGGTCTATCTACATTCCAGGAAATTCATACGCTCC  |
|                                        |   | 210220230240250260                                                    |
|                                        |   | ATGGACGGAGCAAAAAGTGGAGTCTTGGTCAGAGCAAGCCACCCTAT TCTATTACCAGACATAATTG  |
| Syzygium_samarangense_contig1 (1>1317) | → | ATGGACGGAGCAAAAAGTGGAGTCTTGGTCAGAGCAAGCCACCCTAT TCTATTACCAGACATAATTG  |
|                                        |   | 270280290300310320330                                                 |
|                                        |   | GGAGAAGCTCATCCGAAACTAGAGCTAGAAAGGCCTCAT TTCGTTTCGTTCCCGT TTTTATTATCCT |
| Syzygium_samarangense_contig1 (1>1317) | → | GGAGAAGCTCATCCGAAACTAGAGCTAGAAAGGCCTCAT TTCGTTTCGTTCCCGT TTTTATTATCCT |
|                                        |   | 340350360370380390400                                                 |
|                                        |   | TCTTCTCGAATCCAAGGGGACTTATCATATTTAGAATCTT TCTGCGGTGTGCTCCGTTTACTATTC   |
| Syzygium_samarangense_contig1 (1>1317) | → | TCTTCTCGAATCCAAGGGGACTTATCATATTTAGAATCTT TCTGCGGTGTGCTCCGTTTACTATTC   |
|                                        |   | 410420430440450460                                                    |
|                                        |   | TTTCGTACTCTCTTCTCTTTACCACGCGATAGGTCAGCGAAGCGTGAGCGGGCGCGGAGAAGGAAAAG  |
| Syzygium_samarangense_contig1 (1>1317) | → | TTTCGTACTCTCTTCTCTTTACCACGCGATAGGTCAGCGAAGCGTGAGCGGGCGCGGAGAAGGAAAAG  |
|                                        |   | 470480490500510520530                                                 |
|                                        |   | GCCAAAGACTTCGGCCTAAGGGAAATGAGCAACGACGAAATGACAAAATGAGGTGCTCCGGGCACTC   |
| Syzygium_samarangense_contig1 (1>1317) | → | GCCAAAGACTTCGGCCTAAGGGAAATGAGCAACGACGAAATGACAAAATGAGGTGCTCCGGGCACTC   |
|                                        |   | 540550560570580590600                                                 |
|                                        |   | CCATTTAGAAAGAAGTTTAGAAGGTTTTGGGCCGTGTAGCTTTTCCCGTCCCCCTTCATCGGGTGGT   |
| Syzygium_samarangense_contig1 (1>1317) | → | CCATTTAGAAAGAAGTTTAGAAGGTTTTGGGCCGTGTAGCTTTTCCCGTCCCCCTTCATCGGGTGGT   |
|                                        |   | 610620630640650660670                                                 |
|                                        |   | GCTTGTGTGGGGGTGTGCCACCAGAAATCGGGCTTGAAGCTCTCGCCTTACCAACGAGCCGACAGC    |
| Syzygium_samarangense_contig1 (1>1317) | → | GCTTGTGTGGGGGTGTGCCACCAGAAATCGGGCTTGAAGCTCTCGCCTTACCAACGAGCCGACAGC    |
|                                        |   | 680690700710720730                                                    |
|                                        |   | TGATGGCTGTTGGTCAGACTACTACCAAAAAGCTCCAATGAAGATGAATATTTACATGTAGGAGT     |
| Syzygium_samarangense_contig1 (1>1317) | → | TGATGGCTGTTGGTCAGACTACTACCAAAAAGCTCCAATGAAGATGAATATTTACATGTAGGAGT     |
|                                        |   | 740750760770780790800                                                 |
|                                        |   | GTGCATCTCTATGTTGGGTGTTCTTCTGTCTAACACAAAGAAGATAGAGTTCACTCAACGATTGCCT   |
| Syzygium_samarangense_contig1 (1>1317) | → | GTGCATCTCTATGTTGGGTGTTCTTCTGTCTAACACAAAGAAGATAGAGTTCACTCAACGATTGCCT   |
|                                        |   | 810820830840850860870                                                 |
|                                        |   | TTGGGTTCGAACTCCATATGGGGAAGGAGCGTTGTTGTTTGCGAGGTCTCGATCATT TACATGGGC   |
| Syzygium_samarangense_contig1 (1>1317) | → | TTGGGTTCGAACTCCATATGGGGAAGGAGCGTTGTTGTTTGCGAGGTCTCGATCATT TACATGGGC   |
|                                        |   | 880890900910920930                                                    |
|                                        |   | CCACTTCTCATTCCATTTGTGGGAATTTGATGATCTATAAACCGTCCCTAAGGAACGATCGGCTCAT   |
| Syzygium_samarangense_contig1 (1>1317) | → | CCACTTCTCATTCCATTTGTGGGAATTTGATGATCTATAAACCGTCCCTAAGGAACGATCGGCTCAT   |
|                                        |   | 9409509609709809901000                                                |
|                                        |   | GTTTGAGCATGATGAATCACTTCGTGCCGACCTGTTGCCAATAAACTTTGCGGCCTCATATGAGAAT   |
| Syzygium_samarangense_contig1 (1>1317) | → | GTTTGAGCATGATGAATCACTTCGTGCCGACCTGTTGCCAATAAACTTTGCGGCCTCATATGAGAAT   |

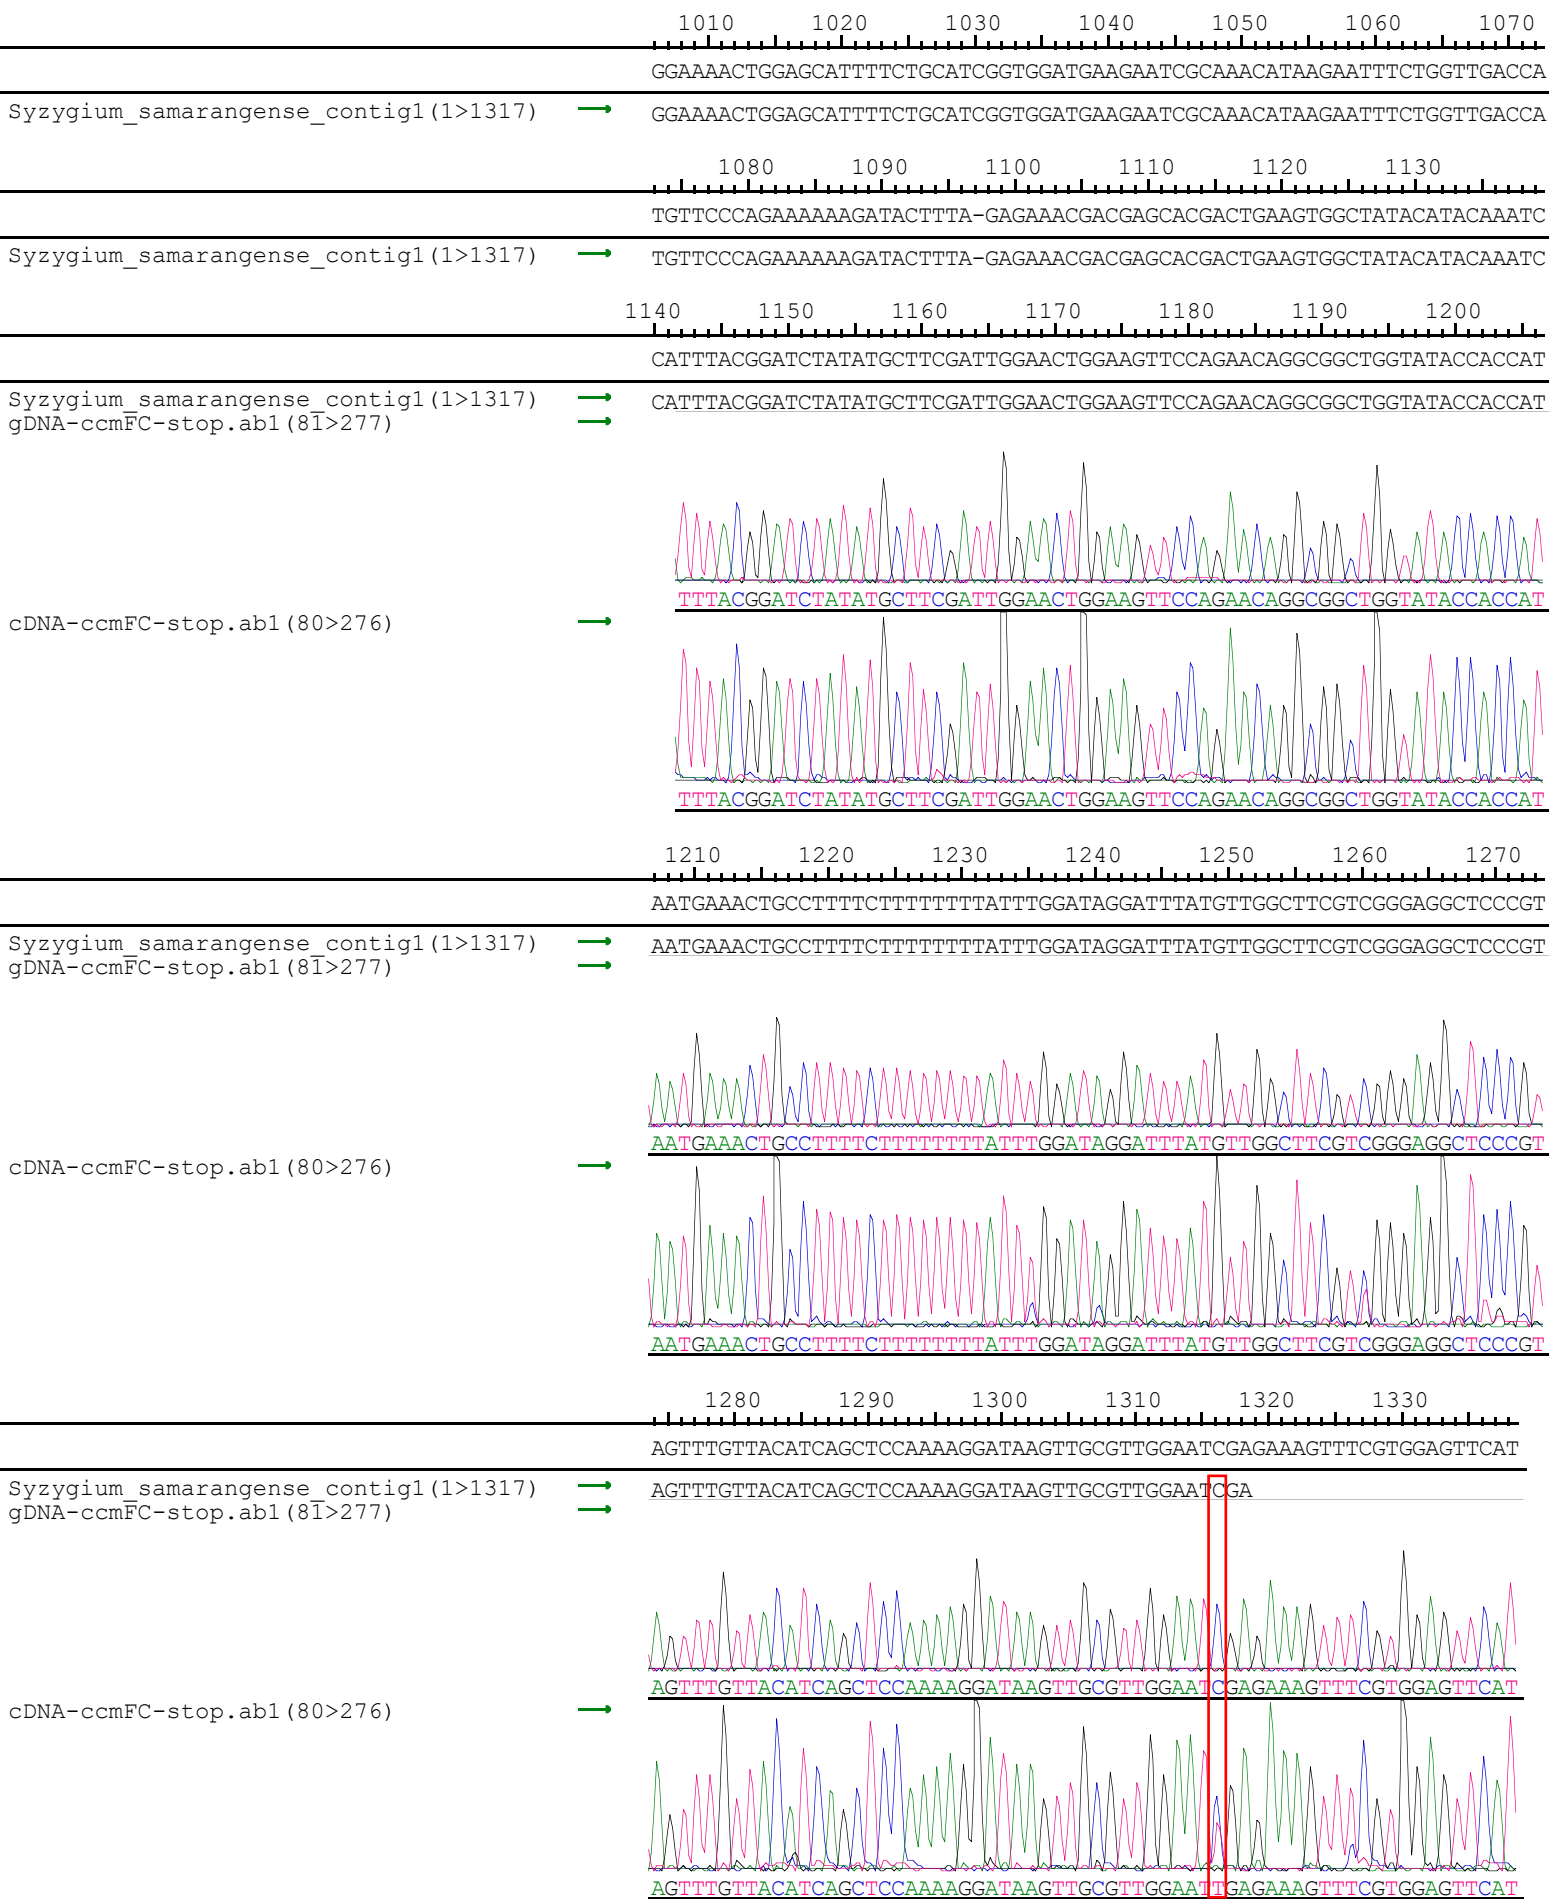

Supplement: Data_Sheet_1.zip [file Data_Sheet_1.zip]
