# Supplementary material for: Complete mitochondrial genome of Syzygium samarangense reveals genomic recombination, gene transfer, and RNA editing events
Source: Frontiers journal article supplement (doi:10.3389/fpls.2023.1301164), 2024-01-09

10 20 30 40 50 60  
AATCAAAACCACCAAAAGTAACGACTACCAAGATACGCATAGTGATTTCGATCTTTTGATCACCCATT

Syzygium samarangense contig1 (1>333) → ACGACTACCAAGATACGCATAGTGATTTCGATCTTTTGATCACCCATT  
gDNA-rps10-start.ab1 (161>402) →

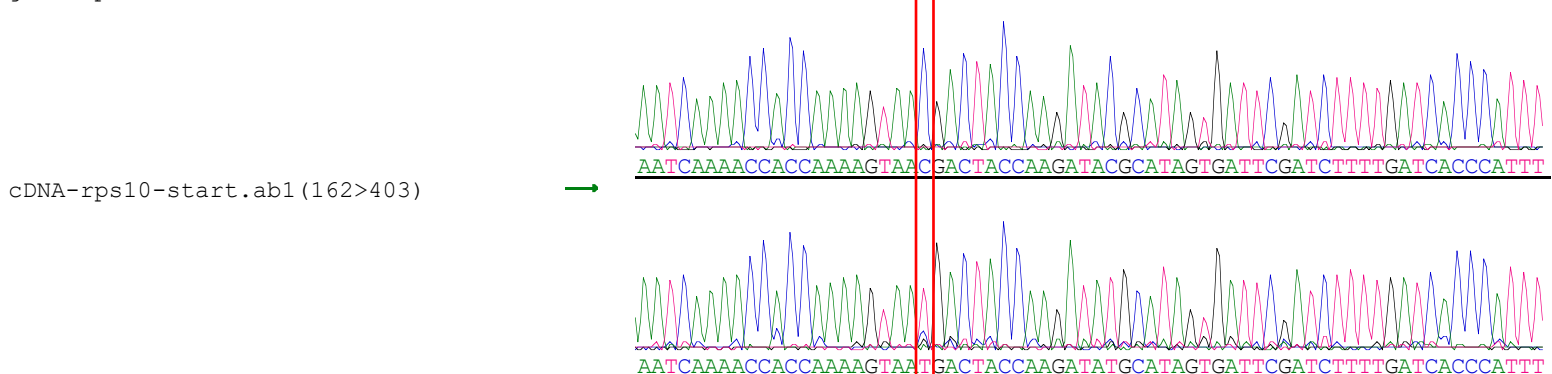

70 80 90 100 110 120 130  
TTGGAAAACCATTTTTTGGGGCTTCCGCCTTACACACGGAAGATTGGATTGCCTGAATCACGAGTATT

Syzygium samarangense contig1 (1>333) → TTGGAAAACCATTTTTTGGGGCTTCCGCCTTACACACGGAAGATTGGATTGCCTGAATCACGAGTATT  
gDNA-rps10-start.ab1 (161>402) →

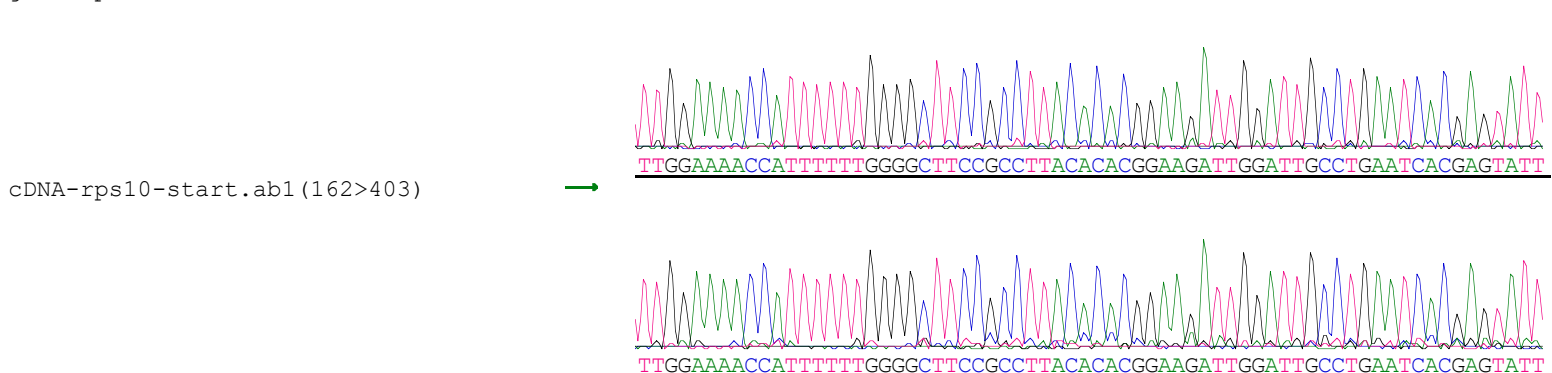

140 150 160 170 180 190 200  
ATATACTGTGTACGATCACCTCATATTGATAAAAAGTCCAGAGAACAATTTGAAATGGAAATCAAGA

Syzygium samarangense contig1 (1>333) → ATATACTGTGTACGATCACCTCATATTGATAAAAAGTCCAGAGAACAATTTGAAATGGAAATCAAGA  
gDNA-rps10-start.ab1 (161>402) →

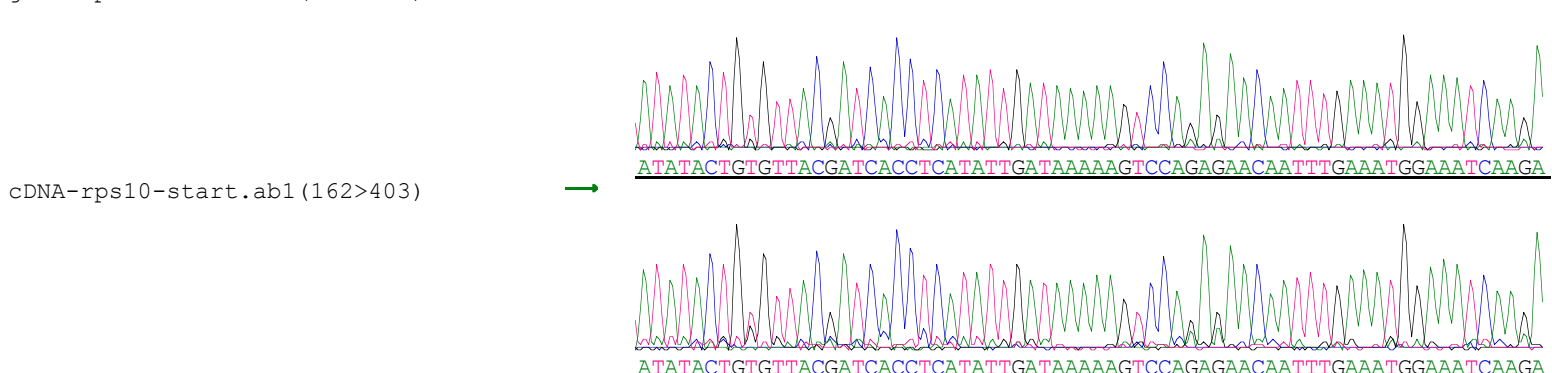

210 220 230 240 250 260 270  
AAGAATTTCTGGTCATAAAAACAGAAAGGCATGAATTGCGCAAGAAGTTCTTTTCGGTTAAAACGCCAG

Syzygium samarangense contig1 (1>333) → AAGAATTTCTGGTCATAAAAACAGAAAGGCATGAATTGCGCAAGAAGTTCTTTTCGGTTAAAACGCCAG  
gDNA-rps10-start.ab1 (161>402) →

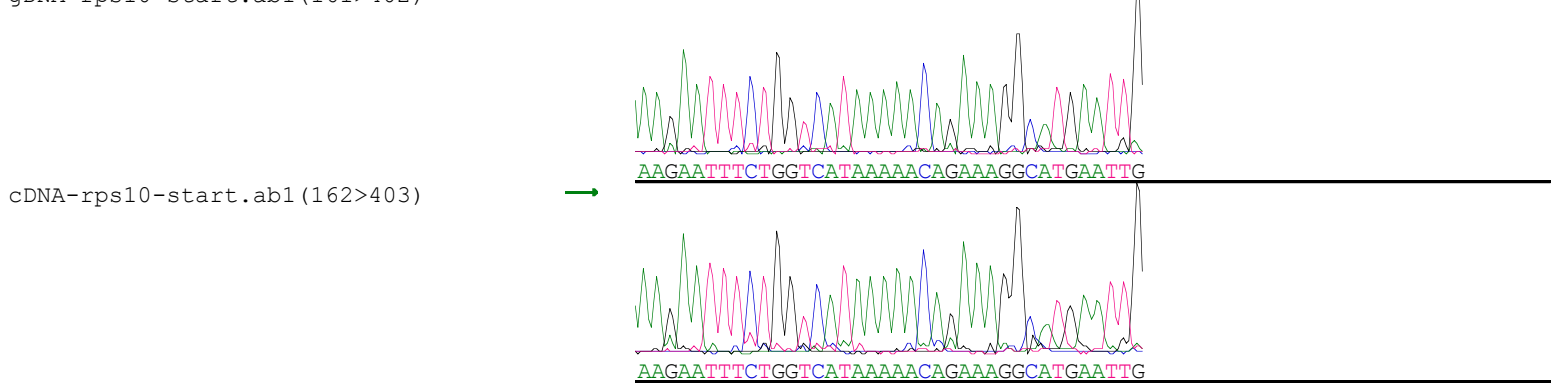

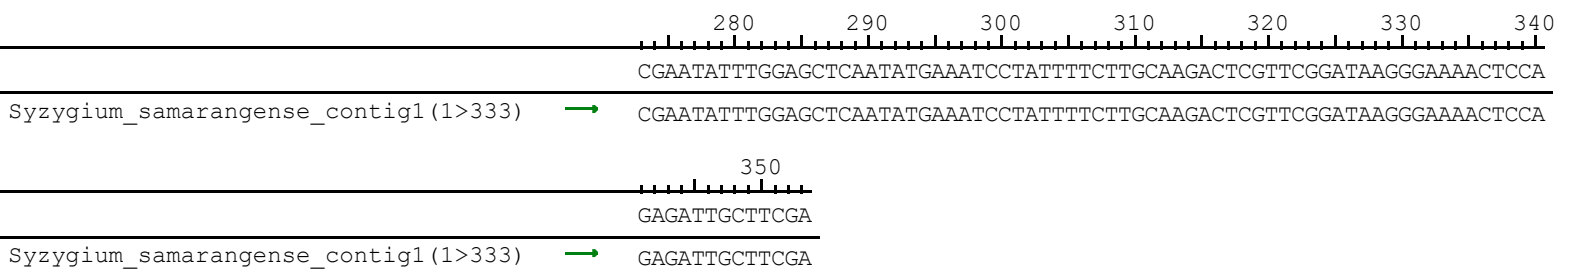

Supplement: Data_Sheet_1.zip [file Data_Sheet_1.zip]
