# Supplementary material for: Complete mitochondrial genome of Syzygium samarangense reveals genomic recombination, gene transfer, and RNA editing events
Source: Frontiers journal article supplement (doi:10.3389/fpls.2023.1301164), 2024-01-09
Supplement: Data_Sheet_1.zip [file Data_Sheet_1.zip]

## Sheet: Table S1
Table S1. Related genera of Syzygium samarangense and their complete mitogenome in GenBank
Order	Genus	GenBank
Myrtales	Syzygium samarangense	OQ701348.1
	Rhodomyrtus tomentosa	NC_071968.1
	Melastoma candidum	NC_071383.1
	Melastoma sanguineum	NC_071384.1
	Melastoma dodecandrum	NC_071385.1
	Punica granatum	NC_071229.1
	Oenothera biennis	MZ934756.1
	Oenothera villaricae	MZ934755.1
	Oenothera elata subsp. Hookeri	MZ934757.1
	Medinilla magnifica	MT043351.1
	Eucalyptus grandis	NC_040010.1
	Lagerstroemia indica	NC_035616.1
Sapindales	Cotinus coggygria	NC_064986.1
	Toona ciliata	NC_065060.1
	Toona sinensis	NC_065061.1
	Mangifera longipes	NC_060990.1
	Nitraria tangutorum	MK431824.1
	Acer miaotaiense	MZ636518.1
	Acer truncatum	MZ318049.1
	Citrus unshiu	NC_057142.1
	Citrus maxima	NC_057143.1
	Citrus sinensis	NC_037463.1
	Spondias tuberosa	NC_045036.1
	Spondias mombin	NC_045035.1
	Peganum harmala	MK431826.1
	Xanthoceras sorbifolium	MK333231.1
	Sapindus mukorossi	NC_050850.1
	Mangifera sylvatica	MZ751077.1
	Mangifera persiciforma	MZ751076.1
Zygophyllales	Zygophyllum fabago	MK431827.1
	Tribulus terrestris	MK431825.1

## Sheet: Table S2
Table S2. Primer sequences used for RNA editing
Gene Name- Editing Site	Forward primer (5'-3')	Reverse primer (5'-3')
nad1-2	ATGAGCGTGAGAAATGC	CAAGCGACCAGACTTAA
nad4L-2	TGCTGGAACGGGTGGA	CCTCGGACTCGGAAAG
rps10-2	CTCGGATGGAGTGTTCG	CAATTCATGCCTTTCTGTT
atp6-1156	TGCCGTTAGCACCTT	CTCGTGGTAAAGACAGATA
ccmFC-1315	GTGGATGAAGAATCGCAAAC	AAGGCTCTGGGCAACG
rps10-331	GGGTGACGGAATAAGGC	ATGGCACCGAAGATGAA

## Sheet: Table S3
Table S3. Relative synonymous codon usage values of each amino acid in the Syzygium samarangense mitogenome
Amino	Codon 1 RSCU	Codon 2 RSCU	Codon 3 RSCU	Codon 4 RSCU	Codon 5 RSCU	Codon 6 RSCU
Ala	GCU	GCA	GCC	GCG
	1.56	1.03	0.98	0.44
Arg	AGA	CGA	CGU	AGG	CGG	CGC
	1.44	1.3	1.13	0.81	0.74	0.59
Asn	AAU	AAC
	1.37	0.63
Asp	GAU	GAC
	1.38	0.62
Cys	UGU	UGC
	1.17	0.83
End	UAA	UGA	UAG
	1.24	1.15	0.62
Gln	CAA	CAG
	1.49	0.51
Glu	GAA	GAG
	1.37	0.63
Gly	GGA	GGU	GGG	GGC
	1.45	1.25	0.75	0.55
His	CAU	CAC
	1.52	0.48
Ile	AUU	AUC	AUA
	1.31	0.87	0.82
Leu	UUA	CUU	UUG	CUA	CUC	CUG
	1.4	1.29	1.24	0.91	0.59	0.56
Lys	AAA	AAG
	1.16	0.84
Met	AUG
	1
Phe	UUU	UUC
	1.13	0.87
Pro	CCU	CCA	CCC	CCG
	1.47	1.14	0.77	0.62
Ser	UCU	UCA	UCC	AGU	UCG	AGC
	1.38	1.08	1.05	1.05	0.83	0.61
Thr	ACU	ACC	ACA	ACG
	1.44	0.97	0.96	0.62
Trp	UGG
	1
Tyr	UAU	UAC
	1.52	0.48
Val	GUU	GUA	GUG	GUC
	1.17	1.16	0.88	0.79

## Sheet: Table S4
Table S4. Simple sequence repeats of the Syzygium samarangense mitogenome
Mitochondrial genome	SSR nr.	SSR type	SSR	size	start	end
Syzygium samarangense	1	p3	(AGC)4	12	1343	1354
Syzygium samarangense	2	p4	(TGAA)3	12	3092	3103
Syzygium samarangense	3	p4	(ATAA)3	12	4366	4377
Syzygium samarangense	4	p5	(ATGGG)3	15	5212	5226
Syzygium samarangense	5	p1	(A)10	10	14788	14797
Syzygium samarangense	6	p2	(TC)6	12	14943	14954
Syzygium samarangense	7	p1	(A)10	10	18659	18668
Syzygium samarangense	8	p1	(A)11	11	18975	18985
Syzygium samarangense	9	p4	(TTTC)3	12	19916	19927
Syzygium samarangense	10	p4	(TCTT)3	12	23026	23037
Syzygium samarangense	11	p1	(T)11	11	24787	24797
Syzygium samarangense	12	p2	(AT)7	14	26694	26707
Syzygium samarangense	13	p1	(T)11	11	26870	26880
Syzygium samarangense	14	p4	(AGCA)3	12	28872	28883
Syzygium samarangense	15	p1	(T)10	10	37707	37716
Syzygium samarangense	16	p4	(AAGA)3	12	43370	43381
Syzygium samarangense	17	p4	(GGCC)3	12	46358	46369
Syzygium samarangense	18	p1	(A)10	10	48836	48845
Syzygium samarangense	19	p3	(CTT)4	12	49216	49227
Syzygium samarangense	20	p1	(A)12	12	50876	50887
Syzygium samarangense	21	p1	(T)12	12	55157	55168
Syzygium samarangense	22	p4	(TTAA)3	12	55769	55780
Syzygium samarangense	23	p4	(GATA)3	12	56917	56928
Syzygium samarangense	24	p4	(TTTG)3	12	59866	59877
Syzygium samarangense	25	p2	(TA)5	10	69641	69650
Syzygium samarangense	26	p2	(TC)5	10	72942	72951
Syzygium samarangense	27	p4	(AGAT)3	12	74332	74343
Syzygium samarangense	28	p3	(CTG)4	12	75843	75854
Syzygium samarangense	29	p1	(T)10	10	85649	85658
Syzygium samarangense	30	p1	(T)16	16	89512	89527
Syzygium samarangense	31	p4	(TGAA)3	12	91869	91880
Syzygium samarangense	32	p4	(TCCA)3	12	93107	93118
Syzygium samarangense	33	p4	(GTCA)3	12	94064	94075
Syzygium samarangense	34	p2	(TA)5	10	94957	94966
Syzygium samarangense	35	p1	(A)11	11	98567	98577
Syzygium samarangense	36	p1	(T)11	11	98842	98852
Syzygium samarangense	37	p4	(AAAG)3	12	99002	99013
Syzygium samarangense	38	p3	(AGC)4	12	99625	99636
Syzygium samarangense	39	p1	(A)11	11	108257	108267
Syzygium samarangense	40	p4	(AAGA)3	12	108919	108930
Syzygium samarangense	41	p2	(TC)5	10	109271	109280
Syzygium samarangense	42	p1	(T)10	10	112157	112166
Syzygium samarangense	43	p1	(T)10	10	121283	121292
Syzygium samarangense	44	p2	(TA)5	10	121309	121318
Syzygium samarangense	45	p1	(T)12	12	121449	121460
Syzygium samarangense	46	p4	(TCTT)3	12	127092	127103
Syzygium samarangense	47	p4	(AGGT)3	12	128549	128560
Syzygium samarangense	48	p3	(TTA)4	12	129287	129298
Syzygium samarangense	49	p1	(A)10	10	141079	141088
Syzygium samarangense	50	p2	(CA)5	10	143851	143860
Syzygium samarangense	51	p2	(TA)5	10	153133	153142
Syzygium samarangense	52	p2	(TA)5	10	153477	153486
Syzygium samarangense	53	p2	(AT)5	10	155977	155986
Syzygium samarangense	54	p3	(AGC)4	12	163054	163065
Syzygium samarangense	55	p5	(CATAA)3	15	164032	164046
Syzygium samarangense	56	p4	(AGTC)3	12	168577	168588
Syzygium samarangense	57	p4	(GACT)3	12	175402	175413
Syzygium samarangense	58	p2	(TC)5	10	180350	180359
Syzygium samarangense	59	p1	(T)12	12	184054	184065
Syzygium samarangense	60	p4	(AGTC)3	12	185428	185439
Syzygium samarangense	61	p4	(TCAG)3	12	185442	185453
Syzygium samarangense	62	p4	(AGTA)3	12	186108	186119
Syzygium samarangense	63	p4	(TTCC)3	12	189629	189640
Syzygium samarangense	64	p1	(A)10	10	189734	189743
Syzygium samarangense	65	p4	(AAGA)3	12	190554	190565
Syzygium samarangense	66	p4	(TACT)3	12	190621	190632
Syzygium samarangense	67	p4	(TATT)3	12	191739	191750
Syzygium samarangense	68	p1	(T)10	10	193965	193974
Syzygium samarangense	69	p1	(T)11	11	195663	195673
Syzygium samarangense	70	p4	(CTTT)3	12	202181	202192
Syzygium samarangense	71	p4	(TGGT)3	12	208487	208498
Syzygium samarangense	72	p1	(T)18	18	208679	208696
Syzygium samarangense	73	p3	(GAA)4	12	209137	209148
Syzygium samarangense	74	p1	(A)10	10	209245	209254
Syzygium samarangense	75	p3	(CTT)4	12	212212	212223
Syzygium samarangense	76	p4	(TTCT)3	12	213715	213726
Syzygium samarangense	77	p4	(GCCG)3	12	219323	219334
Syzygium samarangense	78	p4	(CTTC)3	12	225348	225359
Syzygium samarangense	79	p1	(T)12	12	236124	236135
Syzygium samarangense	80	p1	(A)12	12	238485	238496
Syzygium samarangense	81	p4	(ATTC)3	12	239700	239711
Syzygium samarangense	82	p2	(TA)8	16	241748	241763
Syzygium samarangense	83	p1	(A)10	10	242488	242497
Syzygium samarangense	84	p1	(T)10	10	246610	246619
Syzygium samarangense	85	p2	(AT)5	10	253756	253765
Syzygium samarangense	86	p1	(T)12	12	253787	253798
Syzygium samarangense	87	p1	(T)10	10	256419	256428
Syzygium samarangense	88	p4	(AAAT)3	12	264721	264732
Syzygium samarangense	89	p5	(AGTAG)3	15	271581	271595
Syzygium samarangense	90	p3	(CAT)4	12	280621	280632
Syzygium samarangense	91	p4	(AGAA)3	12	285336	285347
Syzygium samarangense	92	p2	(TA)6	12	297490	297501
Syzygium samarangense	93	p1	(T)10	10	297954	297963
Syzygium samarangense	94	p4	(TCCT)3	12	298278	298289
Syzygium samarangense	95	p1	(T)11	11	300051	300061
Syzygium samarangense	96	p3	(CTT)4	12	305589	305600
Syzygium samarangense	97	p4	(ATAC)3	12	307837	307848
Syzygium samarangense	98	p1	(A)10	10	310581	310590
Syzygium samarangense	99	p1	(T)11	11	316389	316399
Syzygium samarangense	100	p1	(T)13	13	316493	316505
Syzygium samarangense	101	p1	(T)12	12	320990	321001
Syzygium samarangense	102	p1	(T)10	10	321997	322006
Syzygium samarangense	103	p1	(A)10	10	323725	323734
Syzygium samarangense	104	p1	(A)13	13	324074	324086
Syzygium samarangense	105	p5	(CATCT)3	15	324538	324552
Syzygium samarangense	106	p3	(TTC)4	12	330167	330178
Syzygium samarangense	107	p2	(CT)5	10	331206	331215
Syzygium samarangense	108	p2	(TA)6	12	338039	338050
Syzygium samarangense	109	p4	(GGTC)3	12	343081	343092
Syzygium samarangense	110	p1	(A)10	10	347283	347292
Syzygium samarangense	111	p2	(GA)5	10	348319	348328
Syzygium samarangense	112	p4	(AGCC)3	12	350648	350659
Syzygium samarangense	113	p4	(TTCA)3	12	350769	350780
Syzygium samarangense	114	p2	(AG)5	10	355999	356008
Syzygium samarangense	115	p5	(ACTAG)3	15	376084	376098
Syzygium samarangense	116	p1	(A)10	10	378745	378754
Syzygium samarangense	117	p4	(ATGA)3	12	381535	381546
Syzygium samarangense	118	p4	(TCGG)3	12	382613	382624
Syzygium samarangense	119	p4	(GCTA)3	12	384596	384607
Syzygium samarangense	120	p4	(GGCC)3	12	389458	389469
Syzygium samarangense	121	p1	(T)10	10	390196	390205
Syzygium samarangense	122	p1	(T)13	13	394841	394853
Syzygium samarangense	123	p1	(A)10	10	397310	397319
Syzygium samarangense	124	p1	(A)13	13	397858	397870
Syzygium samarangense	125	p5	(ATTAC)3	15	399180	399194
Syzygium samarangense	126	p4	(AGAA)3	12	405578	405589
Syzygium samarangense	127	p1	(T)10	10	412770	412779
Syzygium samarangense	128	p4	(GACA)3	12	413646	413657
Syzygium samarangense	129	p1	(T)11	11	416225	416235
Syzygium samarangense	130	p4	(TCTT)3	12	424124	424135
Syzygium samarangense	131	p1	(T)10	10	424134	424143
Syzygium samarangense	132	p3	(CTT)4	12	424962	424973
Syzygium samarangense	133	p4	(AAAG)3	12	429459	429470
Syzygium samarangense	134	p4	(TGAC)3	12	430057	430068
Syzygium samarangense	135	p3	(GAT)4	12	430182	430193
Syzygium samarangense	136	p1	(A)11	11	431127	431137
Syzygium samarangense	137	p1	(T)10	10	434868	434877
Syzygium samarangense	138	p1	(A)10	10	443945	443954
Syzygium samarangense	139	p5	(TTTTC)3	15	444412	444426
Syzygium samarangense	140	p1	(A)13	13	444474	444486
Syzygium samarangense	141	p1	(T)13	13	444542	444554
Syzygium samarangense	142	p1	(A)11	11	445545	445555
Syzygium samarangense	143	p1	(T)10	10	446541	446550
Syzygium samarangense	144	p2	(AG)5	10	446724	446733
Syzygium samarangense	145	p1	(G)14	14	448881	448894
Syzygium samarangense	146	p3	(TGT)4	12	450626	450637
Syzygium samarangense	147	p4	(CGTC)3	12	455581	455592
Syzygium samarangense	148	p4	(CTTT)3	12	459784	459795
Syzygium samarangense	149	p4	(TGGT)3	12	466090	466101
Syzygium samarangense	150	p1	(T)18	18	466282	466299
Syzygium samarangense	151	p3	(GAA)4	12	466740	466751
Syzygium samarangense	152	p1	(A)10	10	466848	466857
Syzygium samarangense	153	p3	(CTT)4	12	469815	469826
Syzygium samarangense	154	p4	(TTCT)3	12	471318	471329
Syzygium samarangense	155	p4	(GCCG)3	12	476926	476937
Syzygium samarangense	156	p4	(CTTC)3	12	482951	482962
Syzygium samarangense	157	p1	(T)12	12	493727	493738
Syzygium samarangense	158	p4	(ATGG)3	12	498229	498240
Syzygium samarangense	159	p4	(ATAG)3	12	499684	499695
Syzygium samarangense	160	p4	(TAAG)3	12	501553	501564
Syzygium samarangense	161	p1	(T)10	10	501727	501736
Syzygium samarangense	162	p4	(AAGC)3	12	504925	504936
Syzygium samarangense	163	p4	(TCTT)3	12	508986	508997
Syzygium samarangense	164	p4	(AGGT)3	12	510443	510454
Syzygium samarangense	165	p3	(TTA)4	12	511181	511192
Syzygium samarangense	166	p1	(A)10	10	522973	522982
Syzygium samarangense	167	p2	(CA)5	10	525745	525754

## Sheet: Table S5
Table S5. Tandem repeat sequences of the Syzygium samarangense mitogenome
Indices	Period Size	Copy Number	Consensus Size	Percent Matches	Percent Indels	Score	A	C	G	T	Entropy (0-2)
48328--48393	33	2	33	100	0	132	24	30	33	12	1.91
66635--66665	16	1.9	16	93	0	53	22	9	48	19	1.78
67242--67283	20	2.1	20	100	0	84	61	9	28	0	1.27
76337--76372	17	2.1	17	90	10	56	11	27	13	47	1.77
100453--100484	16	2	16	93	0	55	37	34	25	3	1.72
135674--135722	19	2.7	19	76	17	59	4	26	14	55	1.57
142512--142545	17	2	17	94	0	59	32	11	47	8	1.71
148751--148802	26	2	26	100	0	104	42	11	38	7	1.7
224498--224545	21	2.3	21	78	7	53	14	35	18	31	1.91
272819--272864	22	2.1	22	100	0	92	13	36	19	30	1.9
400404--400441	19	2	19	100	0	76	47	0	26	26	1.52
425056--425089	15	2.3	15	89	0	50	35	11	29	23	1.9
433996--434027	16	2	16	93	0	55	37	9	15	37	1.8
442557--442589	16	2.1	16	100	0	66	51	24	6	18	1.68
443730--443786	25	2.2	25	96	3	105	35	14	19	31	1.91
482101--482148	21	2.3	21	78	7	53	14	35	18	31	1.91
507186--507220	18	1.9	18	88	0	52	42	22	20	14	1.88
517568--517616	19	2.7	19	76	17	59	4	26	14	55	1.57
524406--524439	17	2	17	94	0	59	32	11	47	8	1.71

## Sheet: Table S6
Table S6. Dispersed repeat sequences of the Syzygium samarangense mitogenome
The repeat length of the first part	The starting site of the first part	Matching direction	The repeat length of the second part	The starting site of the second part	Interval distance of repeats	E-value
35843	201357	F	35843	458960	0	0
22925	125423	F	22925	507317	0	0
3294	260117	P	3294	494627	0	0
591	415799	P	591	430971	-1	0
582	415808	P	582	430971	0	0
465	167563	P	465	390315	0	8.71e-270
273	64995	F	273	310657	0	3.43e-154
265	85692	F	265	181164	0	2.25e-149
215	165738	P	215	432854	0	2.85e-119
199	28381	F	199	126174	0	1.22e-109
199	28381	F	199	508068	0	1.22e-109
202	154135	P	202	507109	-2	3.5e-106
188	263271	F	188	416726	0	5.14e-103
176	237024	P	176	263235	0	8.62e-96
145	237626	P	145	416230	0	3.98e-77
145	237626	F	145	430986	0	3.98e-77
151	85898	F	151	397334	-2	9.89e-76
145	153991	F	145	433069	-1	1.73e-74
140	237024	P	140	416726	0	4.07e-74
140	416726	P	140	494627	0	4.07e-74
138	85911	F	138	397347	0	6.51e-73
149	390898	F	149	433654	-3	2.27e-72
134	56446	P	134	171984	0	1.67e-70
133	56445	P	133	394947	0	6.67e-70
133	171986	F	133	316134	0	6.67e-70
133	209479	P	133	502610	0	6.67e-70
133	467082	P	133	502610	0	6.67e-70
132	56446	P	132	209480	0	2.67e-69
132	56446	P	132	316134	0	2.67e-69
132	56446	P	132	467083	0	2.67e-69
132	56446	F	132	502610	0	2.67e-69
132	171986	F	132	209480	0	2.67e-69
132	171986	F	132	394947	0	2.67e-69
132	171986	F	132	467083	0	2.67e-69
132	171986	P	132	502610	0	2.67e-69
132	209480	F	132	316134	0	2.67e-69
132	209480	F	132	394947	0	2.67e-69
132	316134	F	132	394947	0	2.67e-69
132	316134	F	132	467083	0	2.67e-69
132	316134	P	132	502610	0	2.67e-69
132	394947	F	132	467083	0	2.67e-69
132	394947	P	132	502610	0	2.67e-69
142	391015	F	142	433771	-3	3.21e-68
138	390974	F	138	433730	-3	7.54e-66
131	391007	F	131	433763	-3	1.05e-61
112	154024	F	112	433102	0	2.93e-57
109	391048	F	109	433804	-2	9.94e-51
106	116244	F	106	359385	-2	6.02e-49
103	391299	P	103	406293	-2	3.64e-47
95	391113	P	95	414697	-1	1.44e-44
89	238984	P	89	407830	-1	5.51e-41
92	198259	F	92	457313	-3	1.09e-38
90	49475	P	90	278637	-3	1.64e-37
90	153901	P	90	359366	-3	1.64e-37
76	11640	F	76	239196	0	1.39e-35
82	15887	P	82	300566	-2	1.01e-34
76	391326	P	76	406293	-1	3.16e-33
82	125424	P	82	236684	-3	8.09e-33
82	125424	P	82	494287	-3	8.09e-33
82	236684	P	82	507318	-3	8.09e-33
82	494287	P	82	507318	-3	8.09e-33
75	92330	P	75	433918	-1	1.25e-32
70	153921	P	70	359366	0	5.67e-32
70	239003	P	70	407830	0	5.67e-32
67	121097	F	67	229214	-1	7.3e-28
67	121097	F	67	486817	-1	7.3e-28
62	185099	P	62	331929	0	3.72e-27
68	152091	P	68	268642	-2	1.86e-26
71	149891	P	71	270162	-3	2.19e-26
60	391148	P	60	414697	0	5.95e-26
70	358445	F	70	441315	-3	8.39e-26
63	11647	P	63	357231	-1	1.76e-25
63	239203	P	63	357231	-1	1.76e-25
64	236702	P	64	507318	-2	4.22e-24
64	494305	P	64	507318	-2	4.22e-24
60	244932	F	60	316435	-1	1.07e-23
55	181834	P	55	273324	0	6.09e-23
65	19595	F	65	143436	-3	6.85e-23
65	19595	F	65	525330	-3	6.85e-23
65	19636	F	65	143477	-3	6.85e-23
65	19636	F	65	525371	-3	6.85e-23
65	359019	F	65	441893	-3	6.85e-23
57	86059	F	57	397485	-1	6.51e-22
60	54092	F	60	256296	-2	9.48e-22
53	11657	P	53	357231	0	9.75e-22
53	92352	P	53	433918	0	9.75e-22
53	239213	P	53	357231	0	9.75e-22
63	217010	P	63	311247	-3	9.97e-22
63	311247	P	63	474613	-3	9.97e-22
59	181370	F	59	397334	-2	3.66e-21
62	188639	F	62	257994	-3	3.8e-21
52	173835	P	52	353956	0	3.9e-21
55	198296	F	55	457350	-1	1.01e-20
55	261395	F	55	379475	-1	1.01e-20
55	379475	P	55	496588	-1	1.01e-20
51	116244	P	51	153921	0	1.56e-20
51	125556	F	51	422166	0	1.56e-20
51	422166	F	51	507450	0	1.56e-20
54	98073	F	54	393350	-1	3.95e-20
57	19644	F	57	143485	-2	5.47e-20
57	19644	F	57	525379	-2	5.47e-20
60	19583	F	60	143424	-3	5.5e-20
60	19583	F	60	525318	-3	5.5e-20
60	19611	F	60	143452	-3	5.5e-20
60	19611	F	60	525346	-3	5.5e-20
60	153576	P	60	176181	-3	5.5e-20
50	391206	P	50	414648	0	6.24e-20
49	56577	P	49	96609	0	2.5e-19
58	149908	P	58	270158	-3	7.93e-19
55	375262	P	55	391111	-2	8.14e-19
48	83917	F	48	273733	0	9.98e-19
54	158581	F	54	392125	-2	3.14e-18
54	158596	F	54	392140	-2	3.14e-18
54	188647	F	54	258002	-2	3.14e-18
54	311256	P	54	474613	-2	3.14e-18
47	152112	P	47	268642	0	3.99e-18
50	48168	P	50	124968	-1	9.36e-18
46	181383	F	46	397347	0	1.6e-17
55	5826	P	55	316444	-3	4.32e-17
55	125458	P	55	236677	-3	4.32e-17
55	125458	P	55	494280	-3	4.32e-17
44	185749	F	44	305801	0	2.56e-16
53	358479	F	53	441349	-3	6.16e-16
53	375262	F	53	414739	-3	6.16e-16
43	162069	F	43	322105	0	1.02e-15
43	163952	P	43	505507	0	1.02e-15
43	182814	F	43	193868	0	1.02e-15
43	276585	F	43	378050	0	1.02e-15
42	116308	F	42	359449	0	4.09e-15
42	427176	P	42	451891	0	4.09e-15
45	5836	P	45	244941	-1	8.62e-15
45	5836	P	45	316444	-1	8.62e-15
45	48104	F	45	391042	-1	8.62e-15
45	116195	F	45	359331	-1	8.62e-15
45	375272	P	45	391111	-1	8.62e-15
48	182742	F	48	457265	-2	1.01e-14
48	359036	F	48	441910	-2	1.01e-14
48	414748	P	48	433865	-2	1.01e-14
50	153505	F	50	296083	-3	3.3e-14
44	95674	F	44	381184	-1	3.37e-14
44	142644	F	44	177955	-1	3.37e-14
44	177955	F	44	524538	-1	3.37e-14
44	236722	P	44	507318	-1	3.37e-14
44	391113	F	44	433869	-1	3.37e-14
44	494325	P	44	507318	-1	3.37e-14
40	48178	P	40	124968	0	6.54e-14
49	165117	F	49	436328	-3	1.24e-13
43	54109	F	43	256313	-1	1.32e-13
43	114433	P	43	451948	-1	1.32e-13
43	155208	F	43	197343	-1	1.32e-13
43	311267	P	43	474613	-1	1.32e-13
43	312652	F	43	393242	-1	1.32e-13
46	136688	F	46	220535	-2	1.49e-13
46	136688	F	46	478138	-2	1.49e-13
46	220166	F	46	438570	-2	1.49e-13
46	220535	F	46	518582	-2	1.49e-13
46	438570	F	46	477769	-2	1.49e-13
46	478138	F	46	518582	-2	1.49e-13
42	92854	P	42	239237	-1	5.15e-13
42	154050	P	42	181498	-1	5.15e-13
42	181498	P	42	433128	-1	5.15e-13
45	48104	F	45	433798	-2	5.69e-13
45	149933	P	45	270146	-2	5.69e-13
45	165333	F	45	436546	-2	5.69e-13
38	53002	F	38	271191	0	1.05e-12
38	89812	F	38	341215	0	1.05e-12
38	182707	F	38	199074	0	1.05e-12
38	273475	F	38	304463	0	1.05e-12
38	303291	F	38	357894	0	1.05e-12
41	193744	P	41	359314	-1	2.01e-12
44	125469	P	44	236677	-2	2.18e-12
44	125469	P	44	494280	-2	2.18e-12
37	5844	P	37	244941	0	4.19e-12
37	5844	P	37	316444	0	4.19e-12
37	163916	P	37	505548	0	4.19e-12
37	165684	F	37	358123	0	4.19e-12
37	167302	F	37	362272	0	4.19e-12
46	55789	P	46	113958	-3	6.55e-12
46	164470	F	46	435664	-3	6.55e-12
46	211702	P	46	305857	-3	6.55e-12
46	305857	P	46	469305	-3	6.55e-12
40	19661	F	40	143502	-1	7.85e-12
40	19661	F	40	525396	-1	7.85e-12
40	135500	P	40	359318	-1	7.85e-12
40	170803	F	40	450445	-1	7.85e-12
40	344242	P	40	458173	-1	7.85e-12
40	359318	P	40	517394	-1	7.85e-12
40	394614	P	40	397538	-1	7.85e-12
43	44909	F	43	239424	-2	8.31e-12
43	375272	F	43	414749	-2	8.31e-12
43	375272	P	43	433869	-2	8.31e-12
36	49529	P	36	278637	0	1.67e-11
45	34678	P	45	216422	-3	2.45e-11
45	34678	P	45	474025	-3	2.45e-11
45	61286	F	45	297126	-3	2.45e-11
45	201724	F	45	296361	-3	2.45e-11
45	296361	F	45	459327	-3	2.45e-11
39	153597	P	39	176181	-1	3.06e-11
39	237212	P	39	507275	-1	3.06e-11
42	125420	F	42	263225	-2	3.17e-11
42	125420	P	42	494771	-2	3.17e-11
42	193748	F	42	230123	-2	3.17e-11
42	193748	F	42	487726	-2	3.17e-11
35	181453	P	35	184424	0	6.7e-11
35	181844	P	35	239463	0	6.7e-11
35	190947	F	35	375257	0	6.7e-11
35	239463	F	35	273334	0	6.7e-11
35	362271	P	35	363758	0	6.7e-11
35	384794	F	35	505002	0	6.7e-11
44	34909	F	44	163756	-3	9.14e-11
44	242958	P	44	452811	-3	9.14e-11
38	414758	P	38	433865	-1	1.19e-10
41	270882	P	41	424182	-2	1.21e-10
34	76933	F	34	439864	0	2.68e-10
34	167302	P	34	363758	0	2.68e-10
34	311276	P	34	474613	0	2.68e-10
43	9638	P	43	253690	-3	3.41e-10
43	149967	P	43	270114	-3	3.41e-10
43	159850	P	43	315561	-3	3.41e-10
40	179096	P	40	358937	-2	4.59e-10
37	15932	P	37	300566	-1	4.65e-10
37	135503	F	37	193744	-1	4.65e-10
37	193744	F	37	517397	-1	4.65e-10
33	5970	F	33	106186	0	1.07e-09
33	11681	P	33	92863	0	1.07e-09
33	47205	P	33	85990	0	1.07e-09
33	47205	P	33	397426	0	1.07e-09
33	48327	F	33	48360	0	1.07e-09
33	57121	P	33	307006	0	1.07e-09
33	92863	P	33	239237	0	1.07e-09
33	113209	F	33	244141	0	1.07e-09
33	118931	P	33	358369	0	1.07e-09
33	167654	F	33	333745	0	1.07e-09
33	236733	P	33	507318	0	1.07e-09
33	333745	P	33	390656	0	1.07e-09
33	357382	P	33	452780	0	1.07e-09
33	494336	P	33	507318	0	1.07e-09
42	188629	F	42	257984	-3	1.27e-09
42	230113	P	42	359319	-3	1.27e-09
42	359319	P	42	487716	-3	1.27e-09
39	263228	F	39	507317	-2	1.74e-09
39	272582	F	39	427120	-2	1.74e-09
39	494771	P	39	507317	-2	1.74e-09
36	91684	F	36	297135	-1	1.81e-09
36	116412	F	36	413253	-1	1.81e-09
36	154135	F	36	237215	-1	1.81e-09
32	44920	F	32	239435	0	4.29e-09
32	49065	F	32	49122	0	4.29e-09
32	116453	P	32	367061	0	4.29e-09
32	119218	F	32	143546	0	4.29e-09
32	119218	F	32	525440	0	4.29e-09
32	164332	P	32	304350	0	4.29e-09
41	61299	F	41	91688	-3	4.71e-09
41	116407	P	41	135503	-3	4.71e-09
41	116407	P	41	517397	-3	4.71e-09
41	153576	F	41	296170	-3	4.71e-09
41	182671	P	41	338682	-3	4.71e-09
38	85665	F	38	413549	-2	6.62e-09
38	98325	P	38	125938	-2	6.62e-09
38	98325	P	38	507832	-2	6.62e-09
35	47213	P	35	106288	-1	7.03e-09
31	48794	F	31	198290	0	1.71e-08
31	326370	F	31	392152	0	1.71e-08
40	188580	F	40	257897	-3	1.74e-08
37	92833	F	37	239465	-2	2.51e-08
37	150478	F	37	151863	-2	2.51e-08
34	33734	P	34	184539	-1	2.73e-08
34	182756	F	34	457279	-1	2.73e-08
34	375281	F	34	414758	-1	2.73e-08
34	455401	P	34	506113	-1	2.73e-08
39	48384	P	39	277350	-3	6.46e-08
39	244237	F	39	272496	-3	6.46e-08
30	91699	P	30	242897	0	6.86e-08
30	114446	P	30	451948	0	6.86e-08
30	154001	P	30	359327	0	6.86e-08
30	162444	F	30	362356	0	6.86e-08
30	359328	P	30	517394	0	6.86e-08
36	75644	P	36	423150	-2	9.49e-08
36	230123	P	36	359315	-2	9.49e-08
33	11749	P	33	357195	-1	1.06e-07
33	61307	P	33	242897	-1	1.06e-07
33	119426	F	33	360094	-1	1.06e-07
33	154304	P	33	507109	-1	1.06e-07
33	209793	P	33	292721	-1	1.06e-07
33	292721	P	33	467396	-1	1.06e-07
33	297114	P	33	452915	-1	1.06e-07
38	236728	P	38	263229	-3	2.38e-07
38	236728	F	38	494771	-3	2.38e-07
38	263229	P	38	494331	-3	2.38e-07
38	494331	F	38	494771	-3	2.38e-07
35	46621	F	35	273953	-2	3.59e-07
35	111607	P	35	333622	-2	3.59e-07
35	153520	F	35	296098	-2	3.59e-07
35	253798	F	35	357470	-2	3.59e-07
35	358333	F	35	441202	-2	3.59e-07
32	135507	F	32	230123	-1	4.12e-07
32	135507	F	32	487726	-1	4.12e-07
32	230123	F	32	517401	-1	4.12e-07
32	239473	P	32	357082	-1	4.12e-07
32	357497	F	32	440767	-1	4.12e-07
32	371396	P	32	424689	-1	4.12e-07
32	416393	P	32	430936	-1	4.12e-07
32	487726	F	32	517401	-1	4.12e-07
37	116411	P	37	193744	-3	8.78e-07
37	116411	F	37	359318	-3	8.78e-07
37	181719	P	37	295806	-3	8.78e-07
37	279770	F	37	505002	-3	8.78e-07
34	54053	F	34	256257	-2	1.35e-06
34	76933	F	34	126597	-2	1.35e-06
34	76933	F	34	508491	-2	1.35e-06
34	126597	F	34	439864	-2	1.35e-06
34	211714	P	34	305857	-2	1.35e-06
34	321376	F	34	412577	-2	1.35e-06
34	439864	F	34	508491	-2	1.35e-06
31	92867	F	31	357231	-1	1.59e-06
31	125482	P	31	237117	-1	1.59e-06
31	125482	F	31	263287	-1	1.59e-06
31	125482	F	31	416742	-1	1.59e-06
31	125482	P	31	494720	-1	1.59e-06
31	128851	F	31	369611	-1	1.59e-06
31	237117	P	31	507376	-1	1.59e-06
31	263287	F	31	507376	-1	1.59e-06
31	272590	F	31	427128	-1	1.59e-06
31	275412	F	31	375768	-1	1.59e-06
31	318628	P	31	441979	-1	1.59e-06
31	369611	F	31	510745	-1	1.59e-06
31	416742	F	31	507376	-1	1.59e-06
31	494720	P	31	507376	-1	1.59e-06
31	494779	P	31	507317	-1	1.59e-06
36	110438	F	36	210453	-3	3.23e-06
36	110438	F	36	468056	-3	3.23e-06
36	116257	F	36	328652	-3	3.23e-06
36	153923	P	36	328652	-3	3.23e-06
36	164548	F	36	345479	-3	3.23e-06
36	182680	P	36	338678	-3	3.23e-06
36	221319	P	36	287946	-3	3.23e-06
36	279769	F	36	384793	-3	3.23e-06
36	287950	P	36	478918	-3	3.23e-06
36	328652	F	36	359398	-3	3.23e-06
36	357813	F	36	441038	-3	3.23e-06
33	6806	F	33	106115	-2	5.09e-06
33	57076	P	33	92908	-2	5.09e-06
33	92833	P	33	181844	-2	5.09e-06
33	92833	F	33	273336	-2	5.09e-06
33	153997	F	33	193738	-2	5.09e-06
33	163915	F	33	338616	-2	5.09e-06
33	171865	P	33	401578	-2	5.09e-06
33	321243	P	33	424369	-2	5.09e-06
33	359328	P	33	487716	-2	5.09e-06
30	19672	F	30	143513	-1	6.17e-06
30	19672	F	30	525407	-1	6.17e-06
30	92841	P	30	357084	-1	6.17e-06
30	135500	F	30	154000	-1	6.17e-06
30	149980	P	30	270114	-1	6.17e-06
30	154000	F	30	517394	-1	6.17e-06
30	166984	F	30	437796	-1	6.17e-06
30	190952	P	30	391136	-1	6.17e-06
30	357646	F	30	440869	-1	6.17e-06
30	358872	F	30	441748	-1	6.17e-06
30	359327	P	30	433079	-1	6.17e-06
30	414767	P	30	433864	-1	6.17e-06
35	14543	P	35	216329	-3	1.18e-05
35	14543	P	35	473932	-3	1.18e-05
35	106287	F	35	379429	-3	1.18e-05
35	142653	P	35	331622	-3	1.18e-05
35	164683	F	35	435877	-3	1.18e-05
35	242199	F	35	501924	-3	1.18e-05
35	331622	P	35	524547	-3	1.18e-05
35	358610	F	35	441484	-3	1.18e-05
35	452655	P	35	452655	-3	1.18e-05
32	61299	F	32	297139	-2	1.91e-05
32	120382	P	32	120382	-2	1.91e-05
32	125430	P	32	237168	-2	1.91e-05
32	154456	P	32	506949	-2	1.91e-05
32	163958	F	32	338653	-2	1.91e-05
32	237168	P	32	507324	-2	1.91e-05
32	338617	P	32	505553	-2	1.91e-05
32	338653	P	32	505512	-2	1.91e-05
32	391486	P	32	406180	-2	1.91e-05
34	149277	P	34	236380	-3	4.33e-05
34	149277	P	34	493983	-3	4.33e-05
34	188590	F	34	257907	-3	4.33e-05
34	220204	F	34	438616	-3	4.33e-05
34	358601	F	34	441475	-3	4.33e-05
34	438616	F	34	477807	-3	4.33e-05
31	15860	P	31	300645	-2	7.18e-05
31	34927	F	31	163774	-2	7.18e-05
31	54745	P	31	446831	-2	7.18e-05
31	115015	P	31	245913	-2	7.18e-05
31	153780	F	31	440390	-2	7.18e-05
31	158608	F	31	326370	-2	7.18e-05
31	180423	P	31	326369	-2	7.18e-05
31	181907	P	31	384698	-2	7.18e-05
31	359602	F	31	453351	-2	7.18e-05
31	443734	F	31	443759	-2	7.18e-05
33	20020	F	33	118474	-3	0.000158
33	78891	F	33	349620	-3	0.000158
33	125670	F	33	167852	-3	0.000158
33	125670	P	33	390458	-3	0.000158
33	165145	F	33	436356	-3	0.000158
33	167852	F	33	507564	-3	0.000158
33	181514	P	33	184358	-3	0.000158
33	191305	F	33	428339	-3	0.000158
33	193738	F	33	433075	-3	0.000158
33	211663	F	33	235549	-3	0.000158
33	211663	F	33	493152	-3	0.000158
33	235549	F	33	469266	-3	0.000158
33	357850	F	33	441075	-3	0.000158
33	390458	P	33	507564	-3	0.000158
33	469266	F	33	493152	-3	0.000158
30	1727	F	30	411295	-2	0.000269
30	55682	P	30	114027	-2	0.000269
30	92876	P	30	358107	-2	0.000269
30	114110	P	30	375926	-2	0.000269
30	135500	P	30	413262	-2	0.000269
30	135501	F	30	433079	-2	0.000269
30	159670	F	30	171863	-2	0.000269
30	159863	P	30	315561	-2	0.000269
30	164543	P	30	198218	-2	0.000269
30	180423	P	30	392152	-2	0.000269
30	181554	P	30	433083	-2	0.000269
30	188673	F	30	258028	-2	0.000269
30	190952	F	30	414739	-2	0.000269
30	220183	F	30	438587	-2	0.000269
30	273256	P	30	357412	-2	0.000269
30	285218	F	30	458064	-2	0.000269
30	359328	F	30	413262	-2	0.000269
30	413267	P	30	517389	-2	0.000269
30	433079	F	30	517395	-2	0.000269
30	438587	F	30	477786	-2	0.000269
32	23714	F	32	231632	-3	0.000574
32	23714	F	32	489235	-3	0.000574
32	47728	F	32	226016	-3	0.000574
32	47728	F	32	483619	-3	0.000574
32	48394	P	32	277347	-3	0.000574
32	54076	F	32	256280	-3	0.000574
32	116412	P	32	230123	-3	0.000574
32	116412	P	32	487726	-3	0.000574
32	119782	F	32	157030	-3	0.000574
32	127129	F	32	127180	-3	0.000574
32	127129	F	32	509074	-3	0.000574
32	127180	F	32	509023	-3	0.000574
32	181550	F	32	359319	-3	0.000574
32	190420	F	32	264969	-3	0.000574
32	201749	F	32	296386	-3	0.000574
32	217041	P	32	341868	-3	0.000574
32	235128	F	32	321734	-3	0.000574
32	236728	F	32	237168	-3	0.000574
32	237168	F	32	494331	-3	0.000574
32	296386	F	32	459352	-3	0.000574
32	302214	F	32	391104	-3	0.000574
32	321734	F	32	492731	-3	0.000574
32	341868	P	32	474644	-3	0.000574
32	427215	P	32	451868	-3	0.000574
32	509023	F	32	509074	-3	0.000574
31	34956	F	31	163802	-3	0.00208
31	41350	P	31	45720	-3	0.00208
31	48794	F	31	457344	-3	0.00208
31	54769	F	31	247359	-3	0.00208
31	61278	F	31	297118	-3	0.00208
31	85675	F	31	413559	-3	0.00208
31	85987	F	31	106295	-3	0.00208
31	91002	F	31	115608	-3	0.00208
31	106295	F	31	397423	-3	0.00208
31	113707	P	31	246741	-3	0.00208
31	115613	P	31	272434	-3	0.00208
31	153999	F	31	230115	-3	0.00208
31	153999	F	31	487718	-3	0.00208
31	167416	F	31	438092	-3	0.00208
31	167620	F	31	401543	-3	0.00208
31	217045	P	31	311244	-3	0.00208
31	230586	F	31	401720	-3	0.00208
31	236677	F	31	237117	-3	0.00208
31	236677	P	31	263287	-3	0.00208
31	236677	P	31	416742	-3	0.00208
31	236677	F	31	494720	-3	0.00208
31	237117	F	31	494280	-3	0.00208
31	263287	P	31	494280	-3	0.00208
31	312286	F	31	344389	-3	0.00208
31	390692	P	31	401543	-3	0.00208
31	401720	F	31	488189	-3	0.00208
31	416742	P	31	494280	-3	0.00208
31	494280	F	31	494720	-3	0.00208
30	11646	F	30	310585	-3	0.00752
30	32115	F	30	412492	-3	0.00752
30	39553	F	30	450558	-3	0.00752
30	47615	P	30	98599	-3	0.00752
30	60219	P	30	123565	-3	0.00752
30	91003	P	30	272439	-3	0.00752
30	114945	F	30	340383	-3	0.00752
30	116193	F	30	116422	-3	0.00752
30	116193	P	30	135499	-3	0.00752
30	116193	P	30	153999	-3	0.00752
30	116193	P	30	517393	-3	0.00752
30	116195	P	30	230113	-3	0.00752
30	116195	P	30	487716	-3	0.00752
30	116421	P	30	135500	-3	0.00752
30	116421	P	30	193741	-3	0.00752
30	116421	F	30	359328	-3	0.00752
30	116421	P	30	517394	-3	0.00752
30	123206	F	30	280660	-3	0.00752
30	142649	P	30	209908	-3	0.00752
30	142649	P	30	467511	-3	0.00752
30	148747	F	30	148773	-3	0.00752
30	154001	P	30	413261	-3	0.00752
30	154005	P	30	181554	-3	0.00752
30	154316	P	30	507100	-3	0.00752
30	159672	P	30	401581	-3	0.00752
30	164643	F	30	435837	-3	0.00752
30	166652	F	30	437492	-3	0.00752
30	177960	P	30	209908	-3	0.00752
30	177960	P	30	467511	-3	0.00752
30	201741	F	30	296378	-3	0.00752
30	209908	P	30	524543	-3	0.00752
30	239202	F	30	310585	-3	0.00752
30	270897	P	30	424178	-3	0.00752
30	273286	F	30	358064	-3	0.00752
30	275954	F	30	375924	-3	0.00752
30	276096	P	30	381278	-3	0.00752
30	280336	F	30	282187	-3	0.00752
30	296378	F	30	459344	-3	0.00752
30	302221	P	30	375287	-3	0.00752
30	312044	P	30	424940	-3	0.00752
30	357841	F	30	441066	-3	0.00752
30	359358	F	30	442191	-3	0.00752
30	365748	P	30	366994	-3	0.00752
30	389434	F	30	398146	-3	0.00752
30	455409	P	30	506109	-3	0.00752
30	467511	P	30	524543	-3	0.00752

## Sheet: Table S7
Table S7. Validation primers for repeat‑mediated recombination
Primer Name	Primer Sequence (5'-3')
SM-C4-F1	CGGACATACCCTGAAAC
SM-C4-R1	CCCGAGAAAGGTGGT
SM-C4-F2	TAATGGATAGGGTAACTGA
SM-C4-R2	CGTCGGGACTCTTGT
SM-C4-F3	TATTCATTCTCGTTCGGCTCT
SM-C4-R3	TGGTCCACCCGTTCCAG
SM-C4-F4	ATGGATAGGGTAACTGATT
SM-C4-R4	GTTTGGGTCCTTGCT
SM-C5-F1	AGGTCAGAATGGGTCA
SM-C5-R1	GAATCAGTAATCGCTCC
SM-C5-F2	AGACAGATTAGATAGCCCTCG
SM-C5-R2	CTTCGGGTCTCAAGTCA
SM-C5-F3	TGAATACTCATAAGTCCGATAC
SM-C5-R3	CTTCATTAAGATTGGGTTAG
SM-C5-F4	AAGAAAGGAATGGAGCAG
SM-C5-R4	CGCAGGCAAACAACC
SM: Syzygium samarangense mitochondrial genome; C4=contig4=Repetitive sequence 1, C5=Repetitive sequence 2; F: forward; R: reverse.

## Sheet: Table S8
Table S8. The homologous DNA fragment in the Syzygium samarangense mitogenome
Number	Mitochondrial genome	% Identity	Alignment Length	Mismatches	Gap Openings	Alignment start (chloroplast genome)	Alignment end (chloroplast genome)	Alignment start (mitochondrial genome)	Alignment end (mitochondrial genome)	E-value	Bit Score	MTPT annotation
MTPT1	mtDNA	100	30	0	0	53959	53988	2585	2556	8.16e-07	56.5	IGS (ndhC，trnV-UAC)
MTPT2	mtDNA	100	34	0	0	107175	107208	76967	76934	4.88e-09	63.9	Partial (trnI-GAU)
	mtDNA	100	34	0	0	140057	140090	76934	76967	4.88e-09	63.9	Partial (trnI-GAU)
MTPT3	mtDNA	99.43	351	1	1	35632	35981	2321	2671	0	636	Partial (psaD)
MTPT4	mtDNA	99.414	1877	3	2	157234	159109	7800	9669	0	3398	Partial (rpl23)，Complete (rpl2)
MTPT5	mtDNA	99.412	850	3	1	25844	26693	221165	222012	0	1541	Partial (rpoB)
MTPT6	mtDNA	99.412	850	3	1	25844	26693	478768	479615	0	1541	Partial (rpoB)
MTPT7	mtDNA	99.383	2432	7	2	87601	90031	10224	7800	0	4401	Partial (rpl22，rpl23)，Complete (rps19，rpl2)
MTPT8	mtDNA	97.647	85	1	1	113080	113164	92331	92414	1.69e-33	145	Complete (trnN-GUU)
	mtDNA	97.647	85	1	1	134101	134185	92414	92331	1.69e-33	145	Complete (trnN-GUU)
MTPT9	mtDNA	94.505	91	4	1	1	90	57480	57390	7.88e-32	139	Complete (trnH-GUG)
MTPT10	mtDNA	93.506	77	4	1	55329	55405	240203	240278	4.78e-24	113	Complete (trnM-CAU)
MTPT11	mtDNA	91.954	87	7	0	93269	93355	297036	296950	7.94e-27	122	Partial (ycf2)
	mtDNA	91.954	87	7	0	153910	153996	296950	297036	7.94e-27	122	Partial (ycf2)
MTPT12	mtDNA	86.76	997	69	22	67644	68635	422094	421156	0	1051	Complete (psbJ，psbL，psbF，psbE)
MTPT13	mtDNA	84.071	339	40	6	32477	32807	443816	444148	1.22e-84	315	Complete (trnD-GUC)
Note: MTPT represent the mitochondrial plastid sequences; IGS represent intergenic spacer region.

## Sheet: Table S9
Table S9. Sequence collinearity of Syzygium samarangense and related genera
query	database	identity (%)	alignment	mismatch	gap	q. start	q. end	d. start	d. end	e-value	score
MZ934755.1	NC035616.1	97.237	2678	43	9	404598	407254	166408	163741	0	4506
MZ934755.1	NC035616.1	96.858	2387	62	8	102807	105185	232832	230451	0	3980
MZ934755.1	NC035616.1	95.987	2417	78	5	6318	8721	228936	226526	0	3908
MZ934755.1	NC035616.1	99.329	2086	12	1	76126	78209	118011	120096	0	3773
MZ934755.1	NC035616.1	92.731	2545	82	47	227086	229543	301425	303953	0	3579
MZ934755.1	NC035616.1	94.859	2237	60	22	211522	213716	68729	66506	0	3443
MZ934755.1	NC035616.1	94.684	2201	35	28	71933	74074	243734	245911	0	3341
MZ934755.1	NC035616.1	98.129	1710	31	1	230317	232025	304138	305847	0	2979
MZ934755.1	NC035616.1	98.461	1689	23	1	131461	133149	126523	128208	0	2972
MZ934755.1	NC035616.1	95.134	1829	54	14	201085	202892	237400	235586	0	2852
MZ934755.1	NC035616.1	96.096	1665	54	8	112454	114115	31453	29797	0	2704
MZ934755.1	NC035616.1	92.413	1898	47	32	270473	272282	290321	292209	0	2617
MZ934755.1	NC035616.1	99.43	1403	8	0	52916	54318	261881	260479	0	2547
MZ934755.1	NC035616.1	96.287	1535	46	4	214355	215889	65770	64247	0	2508
MZ934755.1	NC035616.1	95.287	1549	70	2	352100	353648	149718	148173	0	2453
MZ934755.1	NC035616.1	93.629	1601	49	16	287984	289542	331498	333087	0	2342
MZ934755.1	NC035616.1	94.773	1454	48	15	174522	175964	189358	187922	0	2239
MZ934755.1	NC035616.1	97.072	1332	30	5	272288	273616	292255	293580	0	2235
MZ934755.1	NC035616.1	97.894	1282	24	1	180853	182134	135377	134099	0	2215
MZ934755.1	NC035616.1	97.233	1301	30	2	136251	137550	96311	95016	0	2198
MZ934755.1	NC035616.1	93.507	1494	67	19	257795	259271	23965	25445	0	2194
MZ934755.1	NC035616.1	91.36	1551	65	22	116417	117898	256827	258377	0	2058
MZ934755.1	NC035616.1	94.725	1327	44	7	286309	287625	2036	726	0	2039
MZ934755.1	NC035616.1	95.711	1259	43	6	402020	403273	169062	167810	0	2015
MZ934755.1	NC035616.1	96.306	1191	27	3	255044	256217	21038	22228	0	1940
MZ934755.1	NC035616.1	98.706	1082	8	3	51817	52893	263221	262141	0	1916
MZ934755.1	NC035616.1	94.805	1232	35	10	390943	392156	10942	9722	0	1893
MZ934755.1	NC035616.1	96.903	1130	27	4	74979	76104	116828	117953	0	1886
MZ934755.1	NC035616.1	92.674	1324	58	23	403287	404587	167767	166460	0	1871
MZ934755.1	NC035616.1	97.018	1073	26	2	384926	385998	58236	59302	0	1799
MZ934755.1	NC035616.1	95.682	1019	29	6	220700	221709	320972	321984	0	1624
MZ934755.1	NC035616.1	93.358	1084	48	10	156555	157625	129446	128374	0	1581
MZ934755.1	NC035616.1	93.012	1059	40	14	256709	257743	22794	23842	0	1515
MZ934755.1	NC035616.1	91.644	1101	63	16	17126	18216	253407	252326	0	1496
MZ934755.1	NC035616.1	92.669	1064	28	19	336675	337713	298746	299784	0	1487
MZ934755.1	NC035616.1	96.177	837	19	8	269645	270475	289398	290227	0	1356
MZ934755.1	NC035616.1	97.71	786	18	0	374984	375769	181217	180432	0	1352
MZ934755.1	NC035616.1	96.883	802	23	2	366535	367334	190538	191339	0	1341
MZ934755.1	NC035616.1	95.36	819	35	1	76	894	25438	26253	0	1299
MZ934755.1	NC035616.1	95.55	809	25	6	265719	266524	287265	288065	0	1284
MZ934755.1	NC035616.1	95.849	795	29	1	216588	217378	63243	62449	0	1282
MZ934755.1	NC035616.1	97.965	737	8	1	266528	267264	288121	288850	0	1271
MZ934755.1	NC035616.1	97.429	739	18	1	176004	176741	187812	187074	0	1258
MZ934755.1	NC035616.1	94.451	793	29	10	102013	102795	233703	232916	0	1206
MZ934755.1	NC035616.1	97.947	682	11	2	394141	394819	1	682	0	1179
MZ934755.1	NC035616.1	94.517	766	28	6	253163	253914	2210	2975	0	1170
MZ934755.1	NC035616.1	94.609	742	37	2	298682	299420	88553	89294	0	1146
MZ934755.1	NC035616.1	98.596	641	7	2	374135	374773	182177	181537	0	1133
MZ934755.1	NC035616.1	93.324	749	20	7	135496	136236	97085	96359	0	1079
MZ934755.1	NC035616.1	94.842	698	16	6	264168	264851	285829	286520	0	1072
MZ934755.1	NC035616.1	93.378	740	19	16	337731	338459	299835	300555	0	1068
MZ934755.1	NC035616.1	89.843	827	54	15	122893	123711	4786	3982	0	1035
MZ934755.1	NC035616.1	97.512	603	10	2	375780	376381	180372	179774	0	1026
MZ934755.1	NC035616.1	96.48	625	13	3	197089	197712	238989	239605	0	1024
MZ934755.1	NC035616.1	94.868	643	18	6	183062	183693	132666	132028	0	990
MZ934755.1	NC035616.1	96.639	595	20	0	308876	309470	255084	254490	0	989
MZ934755.1	NC035616.1	94.393	642	24	6	211057	211692	146384	147019	0	976
MZ934755.1	NC035616.1	96.581	585	13	2	101425	102008	234327	233749	0	963
MZ934755.1	NC035616.1	90.444	743	45	12	325220	325945	42411	41678	0	955
MZ934755.1	NC035616.1	93.252	652	33	4	34396	35038	324558	323909	0	950
MZ934755.1	NC035616.1	99.048	525	4	1	134914	135437	97775	97251	0	941
MZ934755.1	NC035616.1	95.826	575	24	0	281290	281864	132013	131439	0	929
MZ934755.1	NC035616.1	92.736	647	30	8	21139	21777	250651	250014	0	918
MZ934755.1	NC035616.1	94.746	590	19	4	232544	233125	306455	307040	0	907
MZ934755.1	NC035616.1	91.454	667	29	9	407296	407944	163660	163004	0	891
MZ934755.1	NC035616.1	95.858	507	12	4	383868	384374	57271	57768	0	811
MZ934755.1	NC035616.1	88.823	671	54	7	118119	118777	258506	259167	0	804
MZ934755.1	NC035616.1	93.309	538	13	5	22548	23085	249022	248508	0	773
MZ934755.1	NC035616.1	93.449	519	13	2	203168	203665	235404	234886	0	750
MZ934755.1	NC035616.1	89.07	613	40	8	254409	255014	20296	20888	0	736
MZ934755.1	NC035616.1	92.146	522	25	9	283149	283667	5355	4847	0	723
MZ934755.1	NC035616.1	83.708	534	43	22	392215	392709	9725	9197	1.85e-129	464
MZ934755.1	NC035616.1	74.667	750	145	34	72367	73094	333222	333948	3.33e-77	291
NC035616.1	NC071229.1	97.831	3411	33	14	238843	242218	2238	5642	0	5851
NC035616.1	NC071229.1	97.831	3411	33	14	238843	242218	97622	101026	0	5851
NC035616.1	NC071229.1	97.729	2818	20	16	289398	292209	149225	152004	0	4809
NC035616.1	NC071229.1	98.566	2719	17	9	163704	166408	348992	351702	0	4785
NC035616.1	NC071229.1	98.504	2607	30	3	226435	229032	251433	248827	0	4590
NC035616.1	NC071229.1	97.549	2693	21	17	301425	304091	390883	388210	0	4566
NC035616.1	NC071229.1	99.035	2384	20	3	230451	232832	259672	262054	0	4272
NC035616.1	NC071229.1	97.927	2460	25	7	331499	333948	234003	231560	0	4237
NC035616.1	NC071229.1	98.771	2279	23	3	125906	128184	335800	338073	0	4048
NC035616.1	NC071229.1	99.243	2245	10	3	118011	120250	16384	18626	0	4045
NC035616.1	NC071229.1	99.243	2245	10	3	118011	120250	111768	114010	0	4045
NC035616.1	NC071229.1	97.427	2371	23	9	66357	68718	288648	290989	0	4006
NC035616.1	NC071229.1	98.763	2263	7	8	243734	245990	43974	41727	0	4004
NC035616.1	NC071229.1	99.005	2212	16	2	87793	89999	375460	377670	0	3958
NC035616.1	NC071229.1	98.889	1891	9	5	64247	66129	286609	288495	0	3365
NC035616.1	NC071229.1	95.632	2106	69	15	147679	149770	129887	127791	0	3358
NC035616.1	NC071229.1	96.529	1988	30	15	235473	237446	163852	161890	0	3253
NC035616.1	NC071229.1	98.738	1822	6	4	116149	117953	14541	16362	0	3221
NC035616.1	NC071229.1	98.738	1822	6	4	116149	117953	109925	111746	0	3221
NC035616.1	NC071229.1	98.244	1765	17	3	29713	31468	402028	403787	0	3075
NC035616.1	NC071229.1	98.841	1725	7	5	304138	305855	388194	386476	0	3062
NC035616.1	NC071229.1	99.405	1681	10	0	260371	262051	312092	310412	0	3049
NC035616.1	NC071229.1	97.051	1797	24	11	240446	242218	229083	230874	0	2998
NC035616.1	NC071229.1	96.44	1798	28	17	9186	10975	181771	180002	0	2933
NC035616.1	NC071229.1	98.826	1619	9	4	256667	258275	191461	193079	0	2876
NC035616.1	NC071229.1	98.373	1598	13	6	187904	189489	281945	280349	0	2795
NC035616.1	NC071229.1	98.791	1572	13	2	210243	211809	172817	174387	0	2793
NC035616.1	NC071229.1	97.263	1498	18	5	298308	299786	60225	58732	0	2518
NC035616.1	NC071229.1	96.308	1544	20	11	90857	92381	378438	379963	0	2501
NC035616.1	NC071229.1	95.669	1547	40	18	23912	25445	51095	49563	0	2460
NC035616.1	NC071229.1	99.554	1346	5	1	726	2070	234274	235619	0	2451
NC035616.1	NC071229.1	95.382	1559	20	14	329583	331129	369917	371435	0	2433
NC035616.1	NC071229.1	97.604	1419	23	5	322112	323520	359100	360517	0	2422
NC035616.1	NC071229.1	99.171	1327	9	1	292258	293582	152016	153342	0	2388
NC035616.1	NC071229.1	99.542	1310	6	0	128493	129802	199761	198452	0	2386
NC035616.1	NC071229.1	99.233	1303	5	1	95016	96313	203050	204352	0	2346
NC035616.1	NC071229.1	99.61	1283	5	0	131384	132666	225172	226454	0	2342
NC035616.1	NC071229.1	98.824	1275	12	2	134099	135370	226928	228202	0	2268
NC035616.1	NC071229.1	99.351	1233	3	1	332721	333948	7560	6328	0	2228
NC035616.1	NC071229.1	99.351	1233	3	1	332721	333948	102944	101712	0	2228
NC035616.1	NC071229.1	99.748	1191	3	0	21038	22228	53822	52632	0	2183
NC035616.1	NC071229.1	97.408	1273	16	5	167810	169066	352993	354264	0	2152
NC035616.1	NC071229.1	99.822	1125	2	0	262100	263224	310403	309279	0	2067
NC035616.1	NC071229.1	99.123	1140	9	1	326761	327899	367473	368612	0	2049
NC035616.1	NC071229.1	99.638	1104	4	0	58199	59302	139203	140306	0	2017
NC035616.1	NC071229.1	99.724	1087	3	0	320974	322060	397575	396489	0	1991
NC035616.1	NC071229.1	98.048	1127	13	8	254378	255496	188603	189728	0	1951
NC035616.1	NC071229.1	97.548	1101	2	3	252326	253422	240107	239028	0	1860
NC035616.1	NC071229.1	98.575	1053	11	1	30420	31468	77202	76150	0	1858
NC035616.1	NC071229.1	98.09	1047	6	7	22797	23838	52140	51103	0	1810
NC035616.1	NC071229.1	99.494	989	5	0	121634	122622	161388	160400	0	1799
NC035616.1	NC071229.1	96.449	1070	15	11	299832	300889	58719	57661	0	1744
NC035616.1	NC071229.1	99.358	934	6	0	190531	191464	269668	268735	0	1692
NC035616.1	NC071229.1	97.951	976	5	5	41436	42410	373454	372493	0	1677
NC035616.1	NC071229.1	99.564	918	4	0	166850	167767	352062	352979	0	1674
NC035616.1	NC071229.1	98.015	957	14	3	125906	126862	74178	75129	0	1657
NC035616.1	NC071229.1	96.256	1015	17	11	19223	20237	55531	54538	0	1644
NC035616.1	NC071229.1	98.06	928	8	2	248110	249031	245214	244291	0	1605
NC035616.1	NC071229.1	99.419	861	5	0	297169	298029	84426	83566	0	1563
NC035616.1	NC071229.1	99.877	816	1	0	125017	125832	73355	74170	0	1502
NC035616.1	NC071229.1	99.877	816	1	0	125017	125832	334977	335792	0	1502
NC035616.1	NC071229.1	99.633	818	3	0	25438	26255	49411	48594	0	1495
NC035616.1	NC071229.1	97.9	857	15	1	2119	2975	235626	236479	0	1480
NC035616.1	NC071229.1	99.873	786	1	0	180432	181217	28114	27329	0	1447
NC035616.1	NC071229.1	99.873	786	1	0	180432	181217	123498	122713	0	1447
NC035616.1	NC071229.1	99.747	790	1	1	285731	286520	143504	144292	0	1447
NC035616.1	NC071229.1	98.415	820	9	2	59673	60488	140556	141375	0	1439
NC035616.1	NC071229.1	98.515	808	10	1	62438	63243	284913	285720	0	1424
NC035616.1	NC071229.1	98.753	802	6	4	287265	288065	145258	146056	0	1423
NC035616.1	NC071229.1	98.731	788	10	0	232916	233703	262066	262853	0	1400
NC035616.1	NC071229.1	94.667	900	37	9	246331	247226	41318	40426	0	1386
NC035616.1	NC071229.1	99.332	748	4	1	60535	61282	141384	142130	0	1352
NC035616.1	NC071229.1	98.935	751	3	2	63303	64048	285738	286488	0	1338
NC035616.1	NC071229.1	96.552	812	8	5	249170	249965	244226	243419	0	1327
NC035616.1	NC071229.1	94.263	889	9	10	328448	329326	369048	369904	0	1321
NC035616.1	NC071229.1	98.643	737	3	1	288121	288850	146060	146796	0	1299
NC035616.1	NC071229.1	95.198	833	10	7	294487	295297	153907	154731	0	1290
NC035616.1	NC071229.1	97.538	731	11	3	68783	69507	130396	131125	0	1243
NC035616.1	NC071229.1	98.31	710	8	1	61336	62041	313398	314107	0	1242
NC035616.1	NC071229.1	98.849	695	7	1	20296	20990	54527	53834	0	1238
NC035616.1	NC071229.1	96.913	745	5	3	96359	97085	204365	205109	0	1232
NC035616.1	NC071229.1	99.12	682	3	2	1	682	6327	5649	0	1223
NC035616.1	NC071229.1	99.12	682	3	2	1	682	101711	101033	0	1223
NC035616.1	NC071229.1	99.12	682	3	2	1	682	231559	230881	0	1223
NC035616.1	NC071229.1	98.694	689	9	0	146331	147019	291519	290831	0	1223
NC035616.1	NC071229.1	98.975	683	5	2	187156	187837	282640	281959	0	1221
NC035616.1	NC071229.1	98.02	707	4	1	169599	170305	354820	355516	0	1219
NC035616.1	NC071229.1	99.401	668	3	1	179705	180372	28791	28125	0	1210
NC035616.1	NC071229.1	99.401	668	3	1	179705	180372	124175	123509	0	1210
NC035616.1	NC071229.1	98.82	678	8	0	258526	259203	193070	193747	0	1208
NC035616.1	NC071229.1	100	641	0	0	181537	182177	27113	26473	0	1184
NC035616.1	NC071229.1	100	641	0	0	181537	182177	122497	121857	0	1184
NC035616.1	NC071229.1	98.938	659	1	2	323906	324558	362342	363000	0	1173
NC035616.1	NC071229.1	98.204	668	7	3	264705	265370	88586	87922	0	1162
NC035616.1	NC071229.1	97.173	672	10	5	250014	250679	243404	242736	0	1127
NC035616.1	NC071229.1	99.038	624	3	1	233749	234369	262858	263481	0	1116
NC035616.1	NC071229.1	97.674	645	11	1	255945	256585	190812	191456	0	1105
NC035616.1	NC071229.1	96.505	658	9	8	163004	163660	348341	348985	0	1075
NC035616.1	NC071229.1	94.492	708	11	15	251576	252277	240801	240116	0	1066
NC035616.1	NC071229.1	95.118	676	22	4	283552	284227	217197	216533	0	1055
NC035616.1	NC071229.1	96.855	636	8	5	242879	243507	44741	44111	0	1053
NC035616.1	NC071229.1	94.883	684	14	5	319560	320243	86227	85565	0	1050
NC035616.1	NC071229.1	97.858	607	10	1	3964	4570	237857	238460	0	1046
NC035616.1	NC071229.1	99.13	575	1	1	266254	266828	61279	61849	0	1031
NC035616.1	NC071229.1	97.054	611	15	1	295482	296089	154861	155471	0	1026
NC035616.1	NC071229.1	97.959	588	10	1	306455	307042	385967	385382	0	1018
NC035616.1	NC071229.1	96.705	607	9	4	112748	113347	21244	21846	0	1000
NC035616.1	NC071229.1	96.705	607	9	4	112748	113347	116628	117230	0	1000
NC035616.1	NC071229.1	99.815	542	1	0	234886	235427	164392	163851	0	996
NC035616.1	NC071229.1	99.63	540	2	0	93221	93760	381218	380679	0	987
NC035616.1	NC071229.1	95.338	622	11	5	307088	307694	385362	384744	0	972
NC035616.1	NC071229.1	91.81	696	22	8	225170	225859	65196	65862	0	937
NC035616.1	NC071229.1	91.81	696	22	8	225170	225859	326818	327484	0	937
NC035616.1	NC071229.1	98.857	525	5	1	97251	97775	205167	205690	0	935
NC035616.1	NC071229.1	98.141	538	6	2	26406	26942	321846	321312	0	935
NC035616.1	NC071229.1	95.254	590	12	4	253722	254306	188020	188598	0	920
NC035616.1	NC071229.1	98.828	512	6	0	42492	43003	372441	371930	0	913
NC035616.1	NC071229.1	93.881	621	8	9	296137	296727	155485	156105	0	909
NC035616.1	NC071229.1	98.444	514	3	1	115378	115886	13839	14352	0	900
NC035616.1	NC071229.1	98.444	514	3	1	115378	115886	109223	109736	0	900
NC035616.1	NC071229.1	95.825	503	1	1	90052	90534	377685	378187	0	795
NC035616.1	NC071229.1	93.621	533	10	9	182908	183440	25480	24972	0	774
NC035616.1	NC071229.1	93.621	533	10	9	182908	183440	120864	120356	0	774
NC035616.1	NC071229.1	92.415	501	9	14	83020	83516	90649	91124	0	688
NC035616.1	NC071229.1	74.016	889	176	41	244163	245021	7059	6196	2.53e-83	311
NC035616.1	NC071229.1	74.016	889	176	41	244163	245021	102443	101580	2.53e-83	311
NC035616.1	NC071229.1	74.016	889	176	41	244163	245021	232291	231428	2.53e-83	311
NC035616.1	NC071229.1	74.7	751	143	35	333222	333948	43550	42823	3.29e-77	291
NC071229.1	NC071385.1	97.234	4845	89	19	55	4869	121083	116254	0	8163
NC071229.1	NC071385.1	93.734	4309	154	49	149113	153362	334204	338455	0	6355
NC071229.1	NC071385.1	97.57	3622	60	12	96649	100253	119864	116254	0	6176
NC071229.1	NC071385.1	94.761	3989	163	12	259406	263385	193027	189076	0	6167
NC071229.1	NC071385.1	96.828	3405	85	9	110577	113968	402281	398887	0	5668
NC071229.1	NC071385.1	96.828	3405	85	9	15193	18584	402281	398887	0	5668
NC071229.1	NC071385.1	94.405	3664	126	36	121050	124684	215017	211404	0	5557
NC071229.1	NC071385.1	94.405	3664	126	36	25666	29300	215017	211404	0	5557
NC071229.1	NC071385.1	93.976	3536	148	32	348317	351822	105933	109433	0	5289
NC071229.1	NC071385.1	97.351	3096	39	9	308905	311984	285	3353	0	5223
NC071229.1	NC071385.1	97.056	2921	52	11	230200	233094	116253	113341	0	4887
NC071229.1	NC071385.1	97.597	2622	42	9	100352	102960	116253	113640	0	4473
NC071229.1	NC071385.1	97.597	2622	42	9	4968	7576	116253	113640	0	4473
NC071229.1	NC071385.1	92.262	2998	144	43	144326	147297	329712	332647	0	4170
NC071229.1	NC071385.1	94.988	2574	102	13	248855	251416	321961	324519	0	4013
NC071229.1	NC071385.1	98.299	1940	24	4	41738	43671	178968	180904	0	3391
NC071229.1	NC071385.1	93.174	2344	99	24	202837	205148	44649	42335	0	3386
NC071229.1	NC071385.1	92.028	2308	95	30	289151	291433	87869	85626	0	3160
NC071229.1	NC071385.1	91.145	2270	109	31	243928	246176	355889	353691	0	2994
NC071229.1	NC071385.1	96.165	1799	52	6	352098	353884	109419	111212	0	2924
NC071229.1	NC071385.1	96.15	1792	59	2	161936	163717	349619	351410	0	2918
NC071229.1	NC071385.1	93.992	1914	99	9	52377	54288	368754	370653	0	2883
NC071229.1	NC071385.1	91.647	2119	89	34	391936	394016	222208	224276	0	2852
NC071229.1	NC071385.1	96.886	1670	47	2	336413	338078	38588	40256	0	2791
NC071229.1	NC071385.1	95.69	1717	57	10	386432	388139	216550	218258	0	2745
NC071229.1	NC071385.1	95.634	1718	59	8	388482	390192	219250	220958	0	2743
NC071229.1	NC071385.1	91.529	1936	91	13	246180	248062	353645	351730	0	2599
NC071229.1	NC071385.1	94.835	1549	65	6	376205	377747	227031	228570	0	2403
NC071229.1	NC071385.1	94.11	1545	90	1	127850	129393	238718	240262	0	2348
NC071229.1	NC071385.1	93.677	1550	54	18	225172	226686	5818	7358	0	2279
NC071229.1	NC071385.1	90.844	1671	86	24	363020	364673	293159	291539	0	2176
NC071229.1	NC071385.1	95.421	1354	52	8	191640	192992	242004	240660	0	2148
NC071229.1	NC071385.1	87.003	1962	114	55	153716	155611	338955	340841	0	2080
NC071229.1	NC071385.1	96.774	1209	35	3	226997	228202	8094	9301	0	2013
NC071229.1	NC071385.1	90.415	1544	83	25	58729	60249	368361	366860	0	1971
NC071229.1	NC071385.1	93.64	1195	54	8	139240	140412	123434	122240	0	1766
NC071229.1	NC071385.1	92.898	1225	59	12	280693	281909	203067	201863	0	1755
NC071229.1	NC071385.1	93.46	1162	64	4	49829	50988	71431	70280	0	1714
NC071229.1	NC071385.1	92.32	1211	62	13	180069	181257	271766	272967	0	1692
NC071229.1	NC071385.1	96.203	1027	20	6	229086	230101	117272	116254	0	1663
NC071229.1	NC071385.1	90.996	1255	47	19	390534	391775	221027	222228	0	1631
NC071229.1	NC071385.1	91.695	1168	50	18	287529	288660	89047	87891	0	1576
NC071229.1	NC071385.1	91.238	1107	64	12	237376	238460	64949	66044	0	1476
NC071229.1	NC071385.1	93.857	993	40	12	138270	139254	124572	123593	0	1476
NC071229.1	NC071385.1	95.795	880	31	4	281943	282821	149324	148450	0	1415
NC071229.1	NC071385.1	95.372	886	40	1	173395	174279	61771	62656	0	1408
NC071229.1	NC071385.1	95.283	848	30	5	73361	74203	166897	167739	0	1336
NC071229.1	NC071385.1	95.283	848	30	5	334983	335825	166897	167739	0	1336
NC071229.1	NC071385.1	95.363	841	26	4	235650	236490	230341	229514	0	1325
NC071229.1	NC071385.1	95.404	805	33	1	268865	269669	357695	356895	0	1279
NC071229.1	NC071385.1	95.63	778	31	3	76188	76964	188511	187736	0	1245
NC071229.1	NC071385.1	95.63	778	31	3	402973	403749	187736	188511	0	1245
NC071229.1	NC071385.1	94.24	816	36	4	402032	402843	170005	169197	0	1236
NC071229.1	NC071385.1	97.103	725	19	2	281943	282666	201758	201035	0	1221
NC071229.1	NC071385.1	94.381	783	43	1	198967	199748	21063	20281	0	1201
NC071229.1	NC071385.1	95.151	763	28	4	248106	248861	321174	321934	0	1195
NC071229.1	NC071385.1	94.868	760	23	6	188608	189359	137050	136299	0	1173
NC071229.1	NC071385.1	91.359	868	58	9	239738	240596	162657	161798	0	1171
NC071229.1	NC071385.1	92.75	800	36	7	234825	235615	187455	186669	0	1136
NC071229.1	NC071385.1	93.683	744	24	8	83246	83975	326161	326895	0	1092
NC071229.1	NC071385.1	90.338	859	42	16	233133	233972	113332	112496	0	1088
NC071229.1	NC071385.1	95.94	665	24	3	48595	49258	72257	71595	0	1075
NC071229.1	NC071385.1	91.775	766	37	12	90330	91088	296739	295993	0	1042
NC071229.1	NC071385.1	90.944	784	39	13	378459	379232	228557	229318	0	1026
NC071229.1	NC071385.1	97.099	586	16	1	347564	348149	105289	105873	0	987
NC071229.1	NC071385.1	92.939	694	24	5	141105	141788	122249	121571	0	987
NC071229.1	NC071385.1	88.956	824	52	15	394654	395448	224450	225263	0	981
NC071229.1	NC071385.1	89.453	768	36	13	360694	361457	294756	294030	0	928
NC071229.1	NC071385.1	95.789	570	22	2	205255	205822	42340	41771	0	918
NC071229.1	NC071385.1	90.661	696	44	6	372508	373201	5808	5132	0	905
NC071229.1	NC071385.1	96.762	525	12	2	143608	144132	329209	329728	0	870
NC071229.1	NC071385.1	95.379	541	15	5	385430	385966	215374	215908	0	852
NC071229.1	NC071385.1	88.613	685	37	17	54311	54968	370640	371310	0	795
NC071229.1	NC071385.1	89.319	646	33	13	147872	148499	333012	333639	0	778
NC071229.1	NC071385.1	92.571	525	36	3	193133	193655	286956	287479	0	750
NC071229.1	NC071385.1	92.621	515	35	3	193133	193645	168862	168349	0	737
NC071229.1	NC071385.1	89.82	501	20	6	361527	362027	294032	293563	2.12e-174	614
NC071229.1	NC071385.1	81.605	511	61	20	116324	116825	346296	345810	1.08e-107	392
NC071229.1	NC071385.1	81.605	511	61	20	20940	21441	346296	345810	1.08e-107	392
NC071229.1	NC071385.1	74.212	888	174	40	6196	7059	179927	180783	5.18e-86	320
NC071229.1	NC071385.1	74.212	888	174	40	101580	102443	179927	180783	5.18e-86	320
NC071229.1	NC071385.1	74.212	888	174	40	231428	232291	179927	180783	5.18e-86	320
NC071229.1	NC071385.1	74.07	887	179	39	42692	43550	115020	114157	6.71e-85	316
NC071385.1	MT043351.1	98.961	12706	79	10	376573	389247	41868	29185	0	22683
NC071385.1	MT043351.1	98.687	11801	81	19	188890	200634	94021	82239	0	20866
NC071385.1	MT043351.1	98.15	11513	107	32	346746	358184	307954	296474	0	19983
NC071385.1	MT043351.1	98.803	10864	70	19	211404	222228	195646	206488	0	19287
NC071385.1	MT043351.1	98.439	9547	70	19	82442	91934	338824	329303	0	16731
NC071385.1	MT043351.1	98.759	7733	66	10	104537	112255	124156	131872	0	13721
NC071385.1	MT043351.1	98.734	6321	60	12	38598	44911	1	6308	0	11212
NC071385.1	MT043351.1	97.92	6251	51	13	293162	299372	67886	61675	0	10750
NC071385.1	MT043351.1	99.532	5764	21	1	1	5764	269637	275394	0	10490
NC071385.1	MT043351.1	95.986	6228	191	16	390406	396590	240234	234023	0	10061
NC071385.1	MT043351.1	97.398	5764	124	9	313138	318878	347804	353564	0	9790
NC071385.1	MT043351.1	98.102	5269	36	15	406790	412026	264400	269636	0	9118
NC071385.1	MT043351.1	98.006	4964	44	18	340146	345061	244352	249308	0	8567
NC071385.1	MT043351.1	98.303	4892	48	10	322032	326895	314262	319146	0	8541
NC071385.1	MT043351.1	98.593	4620	32	9	121454	126056	353575	358178	0	8141
NC071385.1	MT043351.1	98.21	4245	40	10	334204	338444	23195	18983	0	7385
NC071385.1	MT043351.1	98.994	3976	36	3	329720	333693	27673	23700	0	7118
NC071385.1	MT043351.1	98.575	4000	41	9	368695	372687	185637	189627	0	7057
NC071385.1	MT043351.1	98.172	3938	44	8	140845	144760	76325	72394	0	6848
NC071385.1	MT043351.1	99.048	3782	19	4	5793	9574	137979	134215	0	6769
NC071385.1	MT043351.1	98.78	3607	43	1	69975	73581	141453	145058	0	6416
NC071385.1	MT043351.1	94.636	4120	165	36	98578	102672	291674	287586	0	6333
NC071385.1	MT043351.1	98.957	3546	18	10	52453	55985	324745	321206	0	6325
NC071385.1	MT043351.1	99.487	3314	17	0	398887	402200	14331	11018	0	6026
NC071385.1	MT043351.1	98.117	3240	23	8	280496	283712	118732	121956	0	5611
NC071385.1	MT043351.1	97.228	3175	37	24	302922	306080	160181	157042	0	5328
NC071385.1	MT043351.1	99.512	2867	14	0	178617	181483	47421	44555	0	5217
NC071385.1	MT043351.1	98.445	2893	20	5	10005	12890	263545	260671	0	5070
NC071385.1	MT043351.1	97.952	2929	21	6	129434	132325	342452	345378	0	5040
NC071385.1	MT043351.1	97.719	2894	50	4	64038	66922	101992	99106	0	4964
NC071385.1	MT043351.1	97.877	2732	21	8	45298	48004	165573	168292	0	4689
NC071385.1	MT043351.1	98.141	2690	28	5	165442	168119	375032	377711	0	4671
NC071385.1	MT043351.1	98.735	2609	24	2	240673	243280	151281	153881	0	4626
NC071385.1	MT043351.1	98.804	2591	16	4	155165	157748	342415	339833	0	4599
NC071385.1	MT043351.1	98.034	2645	31	6	299468	302093	162813	160171	0	4577
NC071385.1	MT043351.1	97.643	2673	34	11	134881	137546	17795	15145	0	4560
NC071385.1	MT043351.1	94.658	2883	93	17	310277	313117	244352	241489	0	4414
NC071385.1	MT043351.1	97.292	2474	29	17	200626	203067	81823	79356	0	4163
NC071385.1	MT043351.1	98.537	2255	23	4	222208	224457	206649	208898	0	3973
NC071385.1	MT043351.1	95.227	2535	70	18	229388	231911	54429	51935	0	3964
NC071385.1	MT043351.1	99.212	2156	16	1	112250	114404	132060	134215	0	3886
NC071385.1	MT043351.1	97.485	2187	28	6	138681	140843	78610	76427	0	3709
NC071385.1	MT043351.1	98.438	2112	24	2	238409	240516	226029	223923	0	3709
NC071385.1	MT043351.1	98.039	2091	22	8	186745	188827	162808	164887	0	3616
NC071385.1	MT043351.1	99.528	1907	9	0	132949	134855	286856	284950	0	3472
NC071385.1	MT043351.1	96.83	1861	30	7	366860	368697	54614	56468	0	3083
NC071385.1	MT043351.1	97.874	1787	30	7	276123	277906	253192	251411	0	3083
NC071385.1	MT043351.1	96.55	1855	34	12	271700	273540	345320	347158	0	3044
NC071385.1	MT043351.1	88.889	2475	241	17	183335	185788	280544	278083	0	3016
NC071385.1	MT043351.1	97.989	1740	19	3	78419	80146	307944	309679	0	3005
NC071385.1	MT043351.1	98.827	1620	8	3	152713	154323	192233	193850	0	2876
NC071385.1	MT043351.1	96.676	1715	38	6	231895	233591	48626	50339	0	2833
NC071385.1	MT043351.1	98.212	1622	15	6	226960	228570	182290	183908	0	2822
NC071385.1	MT043351.1	98.444	1607	10	5	283844	285443	121948	123546	0	2815
NC071385.1	MT043351.1	97.132	1639	24	5	291543	293159	70050	68413	0	2745
NC071385.1	MT043351.1	84.883	2785	336	58	16561	19288	284712	281956	0	2732
NC071385.1	MT043351.1	96.958	1578	37	4	233580	235148	50358	51933	0	2638
NC071385.1	MT043351.1	93.986	1746	73	15	160926	162655	374972	373243	0	2614
NC071385.1	MT043351.1	99.781	1368	2	1	180116	181483	113044	114410	0	2508
NC071385.1	MT043351.1	98.851	1305	10	1	345345	346649	72774	71475	0	2322
NC071385.1	MT043351.1	98.179	1318	21	3	274075	275391	295556	294241	0	2298
NC071385.1	MT043351.1	98.212	1286	13	1	277884	279159	7218	8503	0	2239
NC071385.1	MT043351.1	98.484	1253	10	1	236690	237933	359422	358170	0	2200
NC071385.1	MT043351.1	97.559	1270	20	6	290126	291390	71312	70049	0	2163
NC071385.1	MT043351.1	98.348	1211	13	2	103346	104549	255783	256993	0	2119
NC071385.1	MT043351.1	96.875	1216	27	8	68411	69618	321044	319832	0	2025
NC071385.1	MT043351.1	97.38	1183	9	5	181468	182636	117174	118348	0	1993
NC071385.1	MT043351.1	97.485	1153	23	5	286421	287568	151457	150306	0	1964
NC071385.1	MT043351.1	98.495	1063	16	0	61769	62831	109411	108349	0	1875
NC071385.1	MT043351.1	96.631	1128	15	5	81073	82188	175786	174670	0	1851
NC071385.1	MT043351.1	95.403	1153	39	3	97266	98409	292811	291664	0	1823
NC071385.1	MT043351.1	96.861	1083	32	2	20268	21349	110392	109311	0	1810
NC071385.1	MT043351.1	97.165	1023	13	4	338477	339483	18800	17778	0	1714
NC071385.1	MT043351.1	99.161	953	7	1	51448	52400	325700	324749	0	1714
NC071385.1	MT043351.1	99.044	941	5	1	50209	51145	370737	369797	0	1685
NC071385.1	MT043351.1	97.792	951	8	4	49156	50093	371728	370778	0	1628
NC071385.1	MT043351.1	94.305	1036	50	3	168988	170014	112558	111523	0	1578
NC071385.1	MT043351.1	98.969	873	9	0	148601	149473	81405	80533	0	1563
NC071385.1	MT043351.1	97.978	890	12	5	397682	398565	56999	57888	0	1539
NC071385.1	MT043351.1	90.267	1161	96	14	253214	254368	154306	155455	0	1502
NC071385.1	MT043351.1	98.467	848	9	3	228557	229402	184496	185341	0	1491
NC071385.1	MT043351.1	99.143	817	3	1	224447	225263	209133	209945	0	1467
NC071385.1	MT043351.1	94.34	954	42	3	389237	390190	241163	240222	0	1452
NC071385.1	MT043351.1	99.239	788	6	0	67635	68422	223009	223796	0	1423
NC071385.1	MT043351.1	97.736	795	11	3	74253	75047	6463	7250	0	1362
NC071385.1	MT043351.1	97.536	771	16	3	168349	169117	150409	151178	0	1315
NC071385.1	MT043351.1	93.788	821	34	11	162689	163503	373253	372444	0	1218
NC071385.1	MT043351.1	96.734	643	5	3	406095	406727	263775	264411	0	1057
NC071385.1	MT043351.1	99.145	585	5	0	157768	158352	339843	339259	0	1053
NC071385.1	MT043351.1	96.918	584	12	5	38004	38581	295990	296573	0	974
NC071385.1	MT043351.1	97.396	576	3	7	333663	334235	23164	23730	0	970
NC071385.1	MT043351.1	84.004	1094	73	51	150344	151385	66731	67774	0	957
NC071385.1	MT043351.1	99.048	525	5	0	329204	329728	28391	27867	0	942
NC071385.1	MT043351.1	97.26	511	8	2	328713	329222	9056	8551	0	861
NC071385.1	MT043351.1	95.514	535	12	7	226498	227032	227426	226904	0	845
NC071385.1	MT043351.1	87.895	727	38	14	92126	92850	29197	28519	0	809
NC071385.1	MT043351.1	73.957	887	178	41	114157	115020	45255	46111	1.05e-82	309
NC071385.1	MT043351.1	73.333	690	143	36	114157	114828	113710	113044	6.53e-55	217
NC071385.1	MT043351.1	71.271	905	224	24	183628	184523	212484	213361	2.37e-49	198
MT043351.1	mtDNA	93.273	6229	243	52	18636	24759	446923	453080	0	9020
MT043351.1	mtDNA	95.458	4778	155	23	196043	200772	82431	87194	0	7564
MT043351.1	mtDNA	93.987	4457	158	36	200798	205209	87190	91581	0	6645
MT043351.1	mtDNA	95.284	4029	147	14	89882	93876	379293	375274	0	6348
MT043351.1	mtDNA	97.641	3476	76	4	11018	14493	216314	219783	0	5960
MT043351.1	mtDNA	97.641	3476	76	4	11018	14493	473917	477386	0	5960
MT043351.1	mtDNA	91.454	4271	202	67	298792	302973	239488	243684	0	5714
MT043351.1	mtDNA	95.619	3561	76	25	269929	273430	167284	163745	0	5638
MT043351.1	mtDNA	95.362	3536	110	26	125561	129060	337952	341469	0	5572
MT043351.1	mtDNA	94.065	3488	128	31	205274	208717	91902	95354	0	5221
MT043351.1	mtDNA	96.316	2470	78	7	314262	316721	244951	247417	0	4045
MT043351.1	mtDNA	94.444	2574	102	17	3731	6265	274766	272195	0	3923
MT043351.1	mtDNA	94.732	2278	68	14	333398	335642	310373	308115	0	3494
MT043351.1	mtDNA	96.41	2117	74	1	303302	305416	389455	387339	0	3487
MT043351.1	mtDNA	95.559	2184	66	12	135799	137962	122852	125024	0	3467
MT043351.1	mtDNA	95.326	2161	84	13	25084	27233	453735	455889	0	3415
MT043351.1	mtDNA	98.046	1945	32	5	45134	47076	359263	357323	0	3376
MT043351.1	mtDNA	94.939	2114	74	14	354599	356691	280724	278623	0	3280
MT043351.1	mtDNA	97.159	1795	45	2	1	1789	199727	201521	0	3027
MT043351.1	mtDNA	96.288	1805	54	5	129046	130840	341740	343541	0	2950
MT043351.1	mtDNA	92.741	2094	59	25	132183	134215	443830	441769	0	2939
MT043351.1	mtDNA	90.694	2235	108	29	67888	70053	384164	381961	0	2883
MT043351.1	mtDNA	96.455	1749	44	8	29191	30934	9535	7800	0	2870
MT043351.1	mtDNA	90.35	2145	157	32	296475	298593	237118	239238	0	2769
MT043351.1	mtDNA	96.015	1606	52	6	182440	184043	507194	505599	0	2601
MT043351.1	mtDNA	95.208	1586	60	6	185605	187186	116098	114525	0	2494
MT043351.1	mtDNA	94.017	1571	90	4	224159	225725	432748	431178	0	2377
MT043351.1	mtDNA	91.385	1776	84	23	345351	347080	296162	297914	0	2368
MT043351.1	mtDNA	95.792	1402	49	2	151265	152656	261466	260065	0	2254
MT043351.1	mtDNA	96.222	1350	41	2	151265	152604	496573	497922	0	2202
MT043351.1	mtDNA	97.531	1215	30	0	134481	135695	121533	122747	0	2078
MT043351.1	mtDNA	92.107	1419	50	9	309152	310520	327747	326341	0	1943
MT043351.1	mtDNA	96.87	1150	33	2	2589	3736	276022	274874	0	1921
MT043351.1	mtDNA	95.09	1161	37	13	141758	142908	182812	183962	0	1810
MT043351.1	mtDNA	91.861	1327	49	24	376484	377771	198297	199603	0	1797
MT043351.1	mtDNA	91.861	1241	63	21	79348	80573	157206	155989	0	1698
MT043351.1	mtDNA	92.824	1087	49	12	55077	56145	43774	44849	0	1548
MT043351.1	mtDNA	92.75	1062	49	11	372759	373804	55227	56276	0	1509
MT043351.1	mtDNA	91.812	1087	57	16	99766	100833	399325	398252	0	1485
MT043351.1	mtDNA	91.869	1070	56	17	332304	333367	311958	310914	0	1465
MT043351.1	mtDNA	95.735	891	36	2	108523	109413	48098	47210	0	1434
MT043351.1	mtDNA	96.82	849	20	2	163755	164596	332123	332971	0	1411
MT043351.1	mtDNA	98.733	789	9	1	113044	113831	358475	359263	0	1400
MT043351.1	mtDNA	95.039	887	35	4	109596	110480	105451	106330	0	1386
MT043351.1	mtDNA	97.315	782	21	0	53529	54310	458950	458169	0	1328
MT043351.1	mtDNA	86.143	1299	89	34	244358	245599	445080	443816	0	1317
MT043351.1	mtDNA	95.63	778	28	3	111566	112341	6004	6777	0	1243
MT043351.1	mtDNA	91.037	926	45	14	320100	321007	39344	38439	0	1216
MT043351.1	mtDNA	95.612	752	22	4	80682	81426	155929	155182	0	1195
MT043351.1	mtDNA	94.094	762	20	9	307944	308689	329044	328292	0	1134
MT043351.1	mtDNA	93.666	742	37	3	15659	16390	202181	202922	0	1101
MT043351.1	mtDNA	93.666	742	37	3	15659	16390	459784	460525	0	1101
MT043351.1	mtDNA	90.717	851	31	15	64328	65153	7669	6842	0	1090
MT043351.1	mtDNA	96.246	666	22	3	143072	143735	184522	185186	0	1088
MT043351.1	mtDNA	94.879	703	20	4	27691	28386	456562	457255	0	1085
MT043351.1	mtDNA	93.831	697	33	4	353691	354382	282463	281772	0	1040
MT043351.1	mtDNA	96.463	622	21	1	1940	2561	276629	276009	0	1026
MT043351.1	mtDNA	93.807	662	41	0	274733	275394	48792	49453	0	996
MT043351.1	mtDNA	93.722	669	32	5	374309	374972	57254	57917	0	994
MT043351.1	mtDNA	96.315	597	14	4	124905	125493	337185	337781	0	974
MT043351.1	mtDNA	92.319	677	34	9	66345	67008	385882	385211	0	946
MT043351.1	mtDNA	93.844	601	27	3	209123	209713	95989	96589	0	896
MT043351.1	mtDNA	91.641	658	35	6	187584	188232	114167	113521	0	893
MT043351.1	mtDNA	87.5	800	51	20	184500	185270	505532	504753	0	878
MT043351.1	mtDNA	95.954	519	21	0	162895	163413	414801	415319	0	843
MT043351.1	mtDNA	91.545	615	15	14	222070	222671	227563	226973	0	813
MT043351.1	mtDNA	91.545	615	15	14	222070	222671	485166	484576	0	813
MT043351.1	mtDNA	88.973	662	41	13	17933	18587	445880	446516	0	789
MT043351.1	mtDNA	89.902	614	49	11	150321	150930	263318	262714	0	778
MT043351.1	mtDNA	89.902	614	49	11	150321	150930	494721	495325	0	778
MT043351.1	mtDNA	85.942	754	73	18	71845	72577	269442	270183	0	774
MT043351.1	mtDNA	90.698	559	51	1	234023	234581	221726	221169	0	743
MT043351.1	mtDNA	90.698	559	51	1	234023	234581	479329	478772	0	743
MT043351.1	mtDNA	93.028	502	17	7	67007	67490	385140	384639	0	717
MT043351.1	mtDNA	90.167	539	22	10	269405	269917	167874	167341	0	673
MT043351.1	mtDNA	84.1	522	66	13	28679	29197	10224	9717	1.61e-136	488
MT043351.1	mtDNA	74.124	885	180	39	45255	46111	442016	441153	6.23e-86	320
MT043351.1	mtDNA	73.508	687	147	32	113044	113710	441345	442016	3.88e-58	228
mtDNA	NC040010.1	99.249	20783	119	9	77675	98422	334264	355044	0	37480
mtDNA	NC040010.1	99.234	18007	97	11	98326	116304	355037	373030	0	32450
mtDNA	NC040010.1	98.843	16600	131	12	363759	380315	473098	456517	0	29534
mtDNA	NC040010.1	98.897	14777	127	12	297300	312048	178824	164056	0	26352
mtDNA	NC040010.1	99.399	13634	49	10	158375	171986	209002	195380	0	24692
mtDNA	NC040010.1	98.693	12627	111	17	34670	47255	81973	69360	0	22354
mtDNA	NC040010.1	98.683	12150	123	14	181339	193460	95818	107958	0	21516
mtDNA	NC040010.1	98.787	11545	105	13	446044	457566	145497	133966	0	20511
mtDNA	NC040010.1	98.58	10989	109	9	252070	263013	7400	18386	0	19385
mtDNA	NC040010.1	99.342	10481	54	6	272166	282633	255065	265543	0	18958
mtDNA	NC040010.1	98.783	10438	79	13	237025	247417	224373	234807	0	18528
mtDNA	NC040010.1	99.442	10030	50	2	380302	390329	445539	455564	0	18207
mtDNA	NC040010.1	98.87	8849	63	16	125470	134285	427147	435991	0	15753
mtDNA	NC040010.1	98.87	8849	63	16	507364	516179	427147	435991	0	15753
mtDNA	NC040010.1	99.446	8480	42	2	324526	333000	295903	304382	0	15394
mtDNA	NC040010.1	99.061	8524	44	10	337173	345671	289514	281002	0	15265
mtDNA	NC040010.1	98.995	8158	52	12	213882	222012	44762	52916	0	14584
mtDNA	NC040010.1	98.995	8158	52	12	471485	479615	44762	52916	0	14584
mtDNA	NC040010.1	98.357	8032	83	15	288621	296624	187596	179586	0	14055
mtDNA	NC040010.1	98.838	7747	77	8	263239	270976	224545	216803	0	13795
mtDNA	NC040010.1	98.988	7609	62	3	198251	205848	108676	116280	0	13610
mtDNA	NC040010.1	99.087	7444	46	5	56578	64004	325530	332968	0	13350
mtDNA	NC040010.1	98.813	7414	60	9	407934	415326	54702	62108	0	13178
mtDNA	NC040010.1	98.893	6865	61	4	48328	55179	409302	402440	0	12242
mtDNA	NC040010.1	99.447	5964	17	4	433919	439868	319926	313965	0	10816
mtDNA	NC040010.1	98.184	5508	66	17	444776	450258	158107	152609	0	9587
mtDNA	NC040010.1	99.191	5070	21	4	425687	430741	390583	395647	0	9118
mtDNA	NC040010.1	98.573	4766	55	3	14888	19644	269009	273770	0	8412
mtDNA	NC040010.1	98.732	4494	35	8	390467	394947	31051	26567	0	7963
mtDNA	NC040010.1	99.318	4397	27	1	502742	507135	295466	291070	0	7950
mtDNA	NC040010.1	98.512	4502	52	3	458961	463451	111783	116280	0	7928
mtDNA	NC040010.1	98.826	4259	41	2	332942	337192	63139	67396	0	7579
mtDNA	NC040010.1	96.737	4444	105	17	121163	125581	213695	209267	0	7367
mtDNA	NC040010.1	99.274	3994	29	0	172119	176112	195262	191269	0	7215
mtDNA	NC040010.1	98.306	4072	27	9	154283	158318	414920	410855	0	7099
mtDNA	NC040010.1	98.633	3950	43	3	232172	236115	91871	95815	0	6985
mtDNA	NC040010.1	98.633	3950	43	3	489775	493718	91871	95815	0	6985
mtDNA	NC040010.1	99.116	3169	14	3	2667	5821	242617	245785	0	5685
mtDNA	NC040010.1	98.522	2909	30	1	495026	497921	18386	15478	0	5121
mtDNA	NC040010.1	97.73	2863	43	8	25552	28407	129713	132560	0	4907
mtDNA	NC040010.1	99.142	2330	6	3	397579	399900	190480	188157	0	4180
mtDNA	NC040010.1	99.502	2211	11	0	356099	358309	3799	1589	0	4023
mtDNA	NC040010.1	98.546	2063	19	5	22817	24868	275833	273771	0	3633
mtDNA	NC040010.1	99.533	1929	9	0	422212	424140	443074	445002	0	3513
mtDNA	NC040010.1	98.571	1889	12	6	430990	432863	426635	424747	0	3325
mtDNA	NC040010.1	95.481	2058	74	13	358284	360329	123051	121001	0	3267
mtDNA	NC040010.1	99.602	1758	7	0	467216	468973	26445	24688	0	3208
mtDNA	NC040010.1	99.602	1758	7	0	209613	211370	26445	24688	0	3208
mtDNA	NC040010.1	97.244	1778	34	3	360544	362306	476332	474555	0	2998
mtDNA	NC040010.1	97.77	1704	30	2	7800	9496	22206	23908	0	2929
mtDNA	NC040010.1	99.301	1573	7	1	525789	527361	309419	307851	0	2841
mtDNA	NC040010.1	99.301	1573	7	1	143895	145467	309419	307851	0	2841
mtDNA	NC040010.1	98.69	1527	14	2	362272	363793	473064	474589	0	2704
mtDNA	NC040010.1	93.876	1731	84	10	222014	223730	252096	253818	0	2590
mtDNA	NC040010.1	93.876	1731	84	10	479617	481333	252096	253818	0	2590
mtDNA	NC040010.1	98.149	1405	26	0	457560	458964	133942	132538	0	2451
mtDNA	NC040010.1	97.747	1376	7	2	442355	443722	477690	476331	0	2348
mtDNA	NC040010.1	99.493	1184	5	1	47210	48393	410452	409270	0	2152
mtDNA	NC040010.1	90.719	1627	115	28	440408	442016	123796	122188	0	2135
mtDNA	NC040010.1	99.228	1166	7	2	252070	253234	128552	129716	0	2102
mtDNA	NC040010.1	99.223	1158	8	1	356099	357256	124952	123796	0	2087
mtDNA	NC040010.1	98.393	1182	12	6	522077	523252	311801	310621	0	2071
mtDNA	NC040010.1	98.393	1182	12	6	140183	141358	311801	310621	0	2071
mtDNA	NC040010.1	99.903	1035	1	0	441422	442456	478724	477690	0	1906
mtDNA	NC040010.1	99.835	605	0	1	439895	440498	313894	313290	0	1110
mtDNA	NC040010.1	96.285	646	16	4	120458	121102	42509	43147	0	1053
mtDNA	NC040010.1	97.039	608	13	2	469479	470086	310250	309648	0	1018
mtDNA	NC040010.1	97.039	608	13	2	211876	212483	310250	309648	0	1018
mtDNA	NC040010.1	93.694	666	31	3	65158	65814	333614	334277	0	987
mtDNA	NC040010.1	97.569	576	6	1	193452	194019	108033	108608	0	979
mtDNA	NC040010.1	96.277	591	20	2	227905	228494	3788	4377	0	968
mtDNA	NC040010.1	96.277	591	20	2	485508	486097	3788	4377	0	968
mtDNA	NC040010.1	96.108	591	20	3	227905	228494	124941	125529	0	961
mtDNA	NC040010.1	96.108	591	20	3	485508	486097	124941	125529	0	961
mtDNA	NC040010.1	96.416	586	14	3	415794	416372	426050	426635	0	959
mtDNA	NC040010.1	89.027	565	41	8	228846	229390	86852	87415	0	680
mtDNA	NC040010.1	89.027	565	41	8	486449	486993	86852	87415	0	680
NC040010.1	NC071968.1	99.155	16571	106	12	338477	355044	312916	329455	0	29794
NC040010.1	NC071968.1	98.722	16582	183	10	456108	472676	95154	78589	0	29420
NC040010.1	NC071968.1	98.297	15792	204	21	100511	116280	33244	17496	0	27612
NC040010.1	NC071968.1	98.749	11272	86	17	255066	266328	253108	264333	0	19983
NC040010.1	NC071968.1	98.328	11002	139	16	7400	18386	229077	218106	0	19256
NC040010.1	NC071968.1	98.373	10385	105	16	224465	234845	244070	233746	0	18183
NC040010.1	NC071968.1	98.551	10145	109	13	132511	142641	10701	581	0	17885
NC040010.1	NC071968.1	99.012	9821	72	10	190212	200024	366402	376205	0	17575
NC040010.1	NC071968.1	98.571	9307	117	5	400002	409302	131772	141068	0	16436
NC040010.1	NC071968.1	98.534	8322	108	6	216241	224558	33491	41802	0	14680
NC040010.1	NC071968.1	99.028	8126	61	11	44762	52874	272447	264327	0	14552
NC040010.1	NC071968.1	99.348	7671	44	2	200062	207732	376215	383879	0	13884
NC040010.1	NC071968.1	98.961	6834	59	4	359962	366793	334251	341074	0	12216
NC040010.1	NC071968.1	98.848	6771	60	7	54702	61465	386951	393710	0	12056
NC040010.1	NC071968.1	97.787	7003	121	19	282511	289504	97176	104153	0	12043
NC040010.1	NC071968.1	98.306	6495	65	13	297895	304382	146493	152949	0	11343
NC040010.1	NC071968.1	98.581	6343	65	6	378219	384550	341063	347391	0	11191
NC040010.1	NC071968.1	98.508	6101	71	9	179586	185678	196121	202209	0	10744
NC040010.1	NC071968.1	98.8	5998	67	1	63139	69131	152891	158888	0	10672
NC040010.1	NC071968.1	99.109	5500	41	2	326464	331963	305204	299713	0	9878
NC040010.1	NC071968.1	99.207	5045	33	2	164056	169100	163952	158915	0	9088
NC040010.1	NC071968.1	98.943	4919	45	5	355037	359950	329359	334275	0	8789
NC040010.1	NC071968.1	98.307	4726	54	6	388029	392752	286427	281726	0	8261
NC040010.1	NC071968.1	99.106	4362	33	4	69360	73719	142146	146503	0	7834
NC040010.1	NC071968.1	98.838	4130	38	4	418157	422281	112218	108094	0	7352
NC040010.1	NC071968.1	98.833	3942	37	2	422520	426461	108098	104166	0	7016
NC040010.1	NC071968.1	98.556	3947	51	2	91871	95817	184051	187991	0	6968
NC040010.1	NC071968.1	98.99	3761	32	5	452018	455775	125753	121996	0	6730
NC040010.1	NC071968.1	98.216	3867	27	5	95818	99683	71431	75256	0	6721
NC040010.1	NC071968.1	98.794	3566	29	3	445365	448930	131274	127723	0	6335
NC040010.1	NC071968.1	99.008	3530	34	1	209904	213433	41823	45351	0	6324
NC040010.1	NC071968.1	98.461	3574	41	4	277568	281137	350941	347378	0	6283
NC040010.1	NC071968.1	97.964	3438	34	9	299940	303372	78578	75172	0	5928
NC040010.1	NC071968.1	98.904	3194	33	2	410864	414056	65376	62184	0	5703
NC040010.1	NC071968.1	98.388	2916	46	1	439147	442062	279189	276275	0	5123
NC040010.1	NC071968.1	96.534	2943	55	18	116269	119172	120700	117766	0	4826
NC040010.1	NC071968.1	98.036	2749	43	10	154507	157253	400547	397808	0	4767
NC040010.1	NC071968.1	98.623	2541	25	4	415603	418133	114726	112186	0	4490
NC040010.1	NC071968.1	98.432	2551	21	3	367611	370161	351753	354284	0	4471
NC040010.1	NC071968.1	94.476	2788	108	13	81898	84668	361674	358916	0	4253
NC040010.1	NC071968.1	98.627	2331	27	5	143168	145497	400547	398221	0	4122
NC040010.1	NC071968.1	99.638	2211	8	0	1589	3799	292331	290121	0	4039
NC040010.1	NC071968.1	99.353	2164	14	0	370937	373100	354850	357013	0	3919
NC040010.1	NC071968.1	99.501	2004	9	1	291070	293072	115174	117177	0	3644
NC040010.1	NC071968.1	98.991	1982	20	0	449386	451367	127735	125754	0	3550
NC040010.1	NC071968.1	99.53	1913	5	1	188163	190071	363591	361679	0	3480
NC040010.1	NC071968.1	95.391	2061	76	13	120998	123051	294354	292306	0	3262
NC040010.1	NC071968.1	99.565	1611	7	0	386370	387980	288040	286430	0	2937
NC040010.1	NC071968.1	98.673	1582	17	1	89019	90600	248787	247210	0	2802
NC040010.1	NC071968.1	99.125	1372	8	1	152609	153980	1948	581	0	2464
NC040010.1	NC071968.1	98.935	1315	14	0	243050	244364	193175	194489	0	2351
NC040010.1	NC071968.1	98.419	1328	21	0	306052	307379	296298	297625	0	2337
NC040010.1	NC071968.1	98.682	1214	12	1	325226	326439	306503	305294	0	2150
NC040010.1	NC071968.1	99.243	1189	3	2	409270	410452	141003	142191	0	2141
NC040010.1	NC071968.1	99.396	1158	6	1	123796	124952	291278	290121	0	2098
NC040010.1	NC071968.1	97.709	1222	21	3	473344	474563	296305	295089	0	2095
NC040010.1	NC071968.1	98.889	1170	10	3	128552	129719	229077	227909	0	2085
NC040010.1	NC071968.1	98.687	1142	13	2	241907	243046	191892	193033	0	2025
NC040010.1	NC071968.1	98.841	1122	9	1	90601	91722	247071	245954	0	1997
NC040010.1	NC071968.1	96.244	1065	27	8	42000	43055	249906	250966	0	1733
NC040010.1	NC071968.1	98.959	961	9	1	177864	178824	194490	195449	0	1718
NC040010.1	NC071968.1	98.107	898	17	0	308522	309419	358915	358018	0	1565
NC040010.1	NC071968.1	99.176	849	4	1	24688	25533	274959	275807	0	1526
NC040010.1	NC071968.1	95.299	936	36	4	29311	30245	384512	385440	0	1478
NC040010.1	NC071968.1	91.682	1070	63	9	252020	253069	249841	248778	0	1459
NC040010.1	NC071968.1	97.541	854	16	2	427505	428354	203929	203077	0	1456
NC040010.1	NC071968.1	97.564	780	14	3	157331	158105	397817	397038	0	1330
NC040010.1	NC071968.1	97.841	741	8	2	208079	208819	383871	384603	0	1273
NC040010.1	NC071968.1	98.793	663	8	0	236874	237536	189562	190224	0	1181
NC040010.1	NC071968.1	97.917	672	4	3	444691	445362	131781	131120	0	1155
NC040010.1	NC071968.1	96.765	680	12	4	236010	236683	120899	121574	0	1125
NC040010.1	NC071968.1	96.497	628	21	1	213453	214079	45420	46047	0	1037
NC040010.1	NC071968.1	96.875	608	14	2	309648	310250	273846	274453	0	1013
NC040010.1	NC071968.1	95.433	635	19	3	61514	62142	393711	394341	0	1003
NC040010.1	NC071968.1	98.214	560	9	1	153947	154505	561	2	0	977
NC040010.1	NC071968.1	98.214	560	9	1	142608	143166	561	2	0	977
NC040010.1	NC071968.1	98.723	548	7	0	370238	370785	354319	354866	0	974
NC040010.1	NC071968.1	90.985	721	53	4	23913	24629	252239	252951	0	961
NC040010.1	NC071968.1	99.051	527	5	0	331996	332522	299571	299045	0	946
NC040010.1	NC071968.1	97.619	546	7	2	281751	282290	164736	164191	0	931
NC040010.1	NC071968.1	96.038	530	21	0	475803	476332	295092	294563	0	863
NC040010.1	NC071968.1	87.443	653	63	12	44122	44771	14002	13366	0	734
NC040010.1	NC071968.1	86.299	708	55	15	254014	254688	12251	11553	0	732
NC040010.1	NC071968.1	85.905	674	62	11	209267	209917	96472	97135	0	688

## Sheet: Table S10
Table S10. RNA editing events predicted in the Syzygium samarangense mitogenome
Region	Position	Amino position	Codon change	Amino change	Coverage-q30	MeanQ	BaseCount[A,C,G,T]	AllSubs	Frequency
atp1	347	116	CCU→CUU	Pro→Leu	18885	36.87	[4, 8002, 7, 10872]	CT CG CA	0.58
atp1	1017	339	GCC→GCU	Ala→Ala	14873	36.78	[7, 10379, 4, 4483]	CT CA CG	0.3
atp1	1029	343	ACC→ACU	Thr→Thr	19909	37.07	[0, 13795, 1, 6113]	CT CG	0.31
atp1	1038	346	AUC→AUU	Ile→Ile	22059	36.82	[0, 16140, 3, 5916]	CT CG	0.27
atp1	1524	508	UUC→UUU	Phe→Phe	13087	36.62	[1, 10366, 5, 2715]	CT CG CA	0.21
atp4	59	20	UCU→UUU	Ser→Phe	32058	36.92	[0, 722, 2, 31334]	CT CG	0.98
atp4	138	46	AUC→AUU	Ile→Ile	29886	36.97	[2, 19934, 1, 9949]	CT CA CG	0.33
atp4	179	60	ACU→AUU	Thr→Ile	40313	36.51	[1, 35815, 12, 4485]	CT CG CA	0.11
atp4	215	72	UCG→UUG	Ser→Leu	35479	36.88	[1, 336, 2, 35140]	CT CG CA	0.99
atp4	227	76	CCC→CUC	Pro→Leu	35692	36.74	[6, 379, 3, 35304]	CT CA CG	0.99
atp4	248	83	CCU→CUU	Pro→Leu	38419	36.96	[0, 378, 2, 38039]	CT CG	0.99
atp4	251	84	CCG→CUG	Pro→Leu	40072	37.23	[0, 304, 0, 39768]	CT	0.99
atp4	395	132	UCA→UUA	Ser→Leu	35697	36.96	[4, 196, 2, 35495]	CT CA CG	0.99
atp4	407	136	CCA→CUA	Pro→Leu	39754	37.36	[2, 394, 3, 39355]	CT CG CA	0.99
atp4	416	139	ACU→AUU	Thr→Ile	37835	36.7	[14, 120, 9, 37692]	CT CA CG	1
atp6	16	6	CCA→UCA	Pro→Ser	15245	36.88	[0, 764, 0, 14481]	CT	0.95
atp6	470	157	ACA→AUA	Thr→Ile	20452	37.13	[0, 16602, 0, 3850]	CT	0.19
atp6	475	159	CCA→UCA	Pro→Ser	20503	37.11	[1, 462, 0, 20040]	CT CA	0.98
atp6	554	185	UCA→UUA	Ser→Leu	6561	37.03	[0, 343, 0, 6218]	CT	0.95
atp6	692	231	UCG→UUG	Ser→Leu	15238	37.26	[0, 474, 0, 14764]	CT	0.97
atp6	700	234	CGU→UGU	Arg→Cys	16698	37.26	[0, 682, 0, 16016]	CT	0.96
atp6	707	236	CCC→CUU	Pro→Leu	14313	36.91	[0, 775, 1, 13537]	CT CG	0.95
atp6	708	236	CCC→CUU	Pro→Leu	14010	36.73	[1, 1821, 0, 12188]	CT CA	0.87
atp6	898	300	CCU→UCU	Pro→Ser	15100	37	[1, 249, 0, 14850]	CT CA	0.98
atp6	901	301	CAU→UAU	His→Tyr	15385	37.16	[2, 408, 0, 14975]	CT CA	0.97
atp6	923	308	UCA→UUA	Ser→Leu	17048	37.15	[0, 343, 1, 16704]	CT CG	0.98
atp6	965	322	CCA→CUA	Pro→Leu	17740	37.35	[1, 208, 0, 17531]	CT CA	0.99
atp6	986	329	UCC→UUC	Ser→Phe	14462	36.55	[9, 300, 6, 14147]	CT CA CG	0.98
atp6	1073	358	CCG→CUG	Pro→Leu	7813	36.95	[29, 412, 11, 7361]	CT CA CG	0.95
atp6	1094	365	UCA→UUA	Ser→Leu	5057	37.28	[1, 121, 0, 4935]	CT CA	0.98
atp6	1102	368	CAU→UAU	His→Tyr	4475	37.01	[1, 152, 0, 4322]	CT CA	0.97
atp6	1109	370	UCU→UUU	Ser→Phe	4277	36.73	[0, 189, 0, 4088]	CT	0.96
atp6	1118	373	UCA→UUA	Ser→Leu	3554	37.31	[0, 95, 0, 3459]	CT	0.97
atp6	1152	384	CUC→CUU	Leu→Leu	1288	35.58	[0, 1147, 1, 140]	CT CG	0.11
atp6	1156	386	CAA→UAA	Gln→End	1328	37.26	[0, 151, 1, 1176]	CT CG	0.89
atp8	47	16	UCA→UUA	Ser→Leu	17592	37.04	[0, 3130, 0, 14462]	CT	0.82
atp8	58	20	CUC→UUC	Leu→Phe	17841	37.18	[1, 3150, 1, 14689]	CT CG CA	0.82
atp8	166	56	CGG→UGG	Arg→Trp	19853	36.94	[26, 5747, 28, 14052]	CT CG CA	0.71
atp8	452	151	CCA→CUA	Pro→Leu	19020	37.08	[0, 2881, 0, 16139]	CT	0.85
atp9	50	17	UCA→UUA	Ser→Leu	95218	37.04	[0, 6815, 0, 88403]	CT	0.93
atp9	115	39	CCA→UCA	Pro→Ser	87659	36.81	[6, 44862, 13, 42778]	CT CG CA	0.49
atp9	134	45	UCA→UUA	Ser→Leu	94620	37.53	[44, 3078, 4, 91494]	CT CA CG	0.97
atp9	156	52	GGC→GGU	Gly→Gly	83862	36.83	[1, 41570, 26, 42265]	CT CG CA	0.5
atp9	189	63	GCC→GCU	Ala→Ala	55971	36.88	[4, 22660, 7, 33300]	CT CG CA	0.6
atp9	191	64	CCA→CUA	Pro→Leu	57154	37.57	[87, 2027, 34, 55006]	CT CA CG	0.96
ccmB	16	6	CUU→UUU	Leu→Phe	4340	36.79	[0, 1990, 0, 2350]	CT	0.54
ccmB	28	10	CAU→UAU	His→Tyr	4596	37.06	[0, 173, 0, 4423]	CT	0.96
ccmB	43	15	CCC→UCC	Pro→Ser	5386	36.79	[0, 162, 0, 5224]	CT	0.97
ccmB	70	24	CCG→UUG	Pro→Leu	5601	36.62	[0, 4825, 0, 776]	CT	0.14
ccmB	71	24	CCG→UUG	Pro→Leu	5934	37.15	[0, 534, 0, 5400]	CT	0.91
ccmB	80	27	UCG→UUG	Ser→Leu	5705	36.72	[0, 4762, 0, 943]	CT	0.17
ccmB	87	29	AUC→AUU	Ile→Ile	5398	36.95	[1, 1950, 1, 3446]	CT CG CA	0.64
ccmB	90	30	GUC→GUU	Val→Val	5337	36.82	[0, 2683, 0, 2654]	CT	0.5
ccmB	128	43	UCA→UUA	Ser→Leu	4362	37.11	[1, 59, 0, 4302]	CT CA	0.99
ccmB	137	46	UCC→UUC	Ser→Phe	4216	36.8	[0, 162, 0, 4054]	CT	0.96
ccmB	148	50	CCG→UUG	Pro→Leu	4464	36.49	[0, 151, 0, 4313]	CT	0.97
ccmB	149	50	CCG→UUG	Pro→Leu	4627	37.02	[0, 337, 0, 4290]	CT	0.93
ccmB	160	54	CCU→UCU	Pro→Ser	4812	36.56	[0, 546, 0, 4266]	CT	0.89
ccmB	164	55	CCG→CUG	Pro→Leu	5255	37.08	[0, 511, 0, 4744]	CT	0.9
ccmB	172	58	CCU→UCU	Pro→Ser	5333	36.63	[0, 231, 0, 5102]	CT	0.96
ccmB	179	60	CCU→CUU	Pro→Leu	5133	36.62	[1, 1063, 0, 4069]	CT CA	0.79
ccmB	181	61	CCC→UCC	Pro→Ser	5018	36.53	[0, 1198, 0, 3820]	CT	0.76
ccmB	193	65	CCU→UUU	Pro→Phe	4518	36.36	[0, 3220, 2, 1296]	CT CG	0.29
ccmB	194	65	CCU→UUU	Pro→Phe	4765	36.67	[1, 1574, 1, 3189]	CT CA CG	0.67
ccmB	286	96	CGG→UGG	Arg→Trp	6343	36.87	[0, 1514, 2, 4827]	CT CG	0.76
ccmB	304	102	CGU→UGU	Arg→Cys	6655	36.82	[0, 1068, 0, 5587]	CT	0.84
ccmB	313	105	CGU→UGU	Arg→Cys	6783	36.96	[1, 1828, 0, 4954]	CT CA	0.73
ccmB	324	108	CCC→CCU	Pro→Pro	6962	37.06	[1, 1025, 1, 5935]	CT CA CG	0.85
ccmB	337	113	CUG→UUG	Leu→Leu	6976	36.68	[0, 6042, 1, 933]	CT CG	0.13
ccmB	367	123	CGG→UGG	Arg→Trp	9429	36.93	[0, 282, 1, 9146]	CT CG	0.97
ccmB	379	127	CUA→UUA	Leu→Leu	9435	36.91	[0, 356, 0, 9079]	CT	0.96
ccmB	392	131	CCG→CUG	Pro→Leu	9091	36.97	[0, 313, 0, 8778]	CT	0.97
ccmB	406	136	CUG→UUG	Leu→Leu	8714	36.64	[0, 2720, 0, 5994]	CT	0.69
ccmB	424	142	CGU→UGU	Arg→Cys	8771	37.08	[0, 334, 1, 8436]	CT CG	0.96
ccmB	428	143	UCG→UUG	Ser→Leu	8709	36.93	[0, 78, 1, 8630]	CT CG	0.99
ccmB	467	156	UCG→UUG	Ser→Leu	7355	36.75	[4, 775, 0, 6576]	CT CA	0.89
ccmB	475	159	CCA→UUA	Pro→Leu	6879	36.65	[0, 285, 1, 6593]	CT CG	0.96
ccmB	476	159	CCA→UUA	Pro→Leu	7087	37.03	[0, 334, 0, 6753]	CT	0.95
ccmB	485	162	UCA→UUA	Ser→Leu	7354	37	[0, 800, 1, 6553]	CT CG	0.89
ccmB	494	165	UCA→UUA	Ser→Leu	7826	37.13	[0, 907, 0, 6919]	CT	0.88
ccmB	502	168	CCA→UUA	Pro→Leu	5297	36.71	[51, 3006, 12, 2228]	CT CA CG	0.43
ccmB	503	168	CCA→UUA	Pro→Leu	4935	36.97	[60, 1023, 21, 3831]	CT CA CG	0.79
ccmB	506	169	ACC→AUC	Thr→Ile	4470	36.66	[1, 1390, 1, 3078]	CT CA CG	0.69
ccmB	512	171	UCU→UUU	Ser→Phe	4683	36.96	[0, 739, 0, 3944]	CT	0.84
ccmB	514	172	CGU→UGU	Arg→Cys	4826	37.24	[0, 28, 1, 4797]	CT CG	0.99
ccmB	551	184	UCA→UUA	Ser→Leu	7793	37.41	[0, 144, 0, 7649]	CT	0.98
ccmB	554	185	UCG→UUG	Ser→Leu	8047	37.42	[0, 177, 0, 7870]	CT	0.98
ccmB	566	189	UCC→UUC	Ser→Phe	7166	36.86	[1, 2223, 1, 4941]	CT CA CG	0.69
ccmB	569	190	UCU→UUU	Ser→Phe	7523	37.12	[0, 1086, 1, 6436]	CT CG	0.86
ccmB	572	191	CCG→CUG	Pro→Leu	7691	37.41	[0, 427, 1, 7263]	CT CG	0.94
ccmB	596	199	UCG→UUG	Ser→Leu	8417	37.33	[0, 71, 0, 8346]	CT	0.99
ccmB	611	204	UCA→UUA	Ser→Leu	7793	36.88	[0, 871, 0, 6922]	CT	0.89
ccmC	5	2	UCC→UUC	Ser→Phe	4935	36.57	[0, 3953, 0, 982]	CT	0.2
ccmC	54	18	UAC→UAU	Tyr→Tyr	4875	36.81	[1, 1077, 1, 3796]	CT CA CG	0.78
ccmC	76	26	CGG→UGG	Arg→Trp	5578	37.17	[0, 117, 0, 5461]	CT	0.98
ccmC	103	35	CAU→UAU	His→Tyr	5716	37.11	[0, 920, 1, 4795]	CT CG	0.84
ccmC	115	39	CGG→UGG	Arg→Trp	5874	36.99	[0, 837, 0, 5037]	CT	0.86
ccmC	133	45	CUU→UUU	Leu→Phe	5835	36.61	[0, 289, 0, 5546]	CT	0.95
ccmC	161	54	CCA→CUA	Pro→Leu	6317	37.19	[0, 189, 0, 6128]	CT	0.97
ccmC	179	60	GCG→GUG	Ala→Val	6234	36.76	[3, 243, 2, 5986]	CT CA CG	0.96
ccmC	184	62	CGG→UGG	Arg→Trp	6292	36.89	[2, 178, 0, 6112]	CT CA	0.97
ccmC	331	111	CGG→UGG	Arg→Trp	8217	36.78	[1, 648, 0, 7568]	CT CA	0.92
ccmC	395	132	UCG→UUG	Ser→Leu	12258	37	[1, 501, 0, 11756]	CT CA	0.96
ccmC	436	146	CCU→UCU	Pro→Ser	15367	36.9	[0, 467, 0, 14900]	CT	0.97
ccmC	446	149	CCG→CUG	Pro→Leu	15872	37.17	[1, 832, 4, 15035]	CT CG CA	0.95
ccmC	458	153	UCA→UUA	Ser→Leu	16491	37.29	[0, 1069, 0, 15422]	CT	0.94
ccmC	463	155	CGU→UGU	Arg→Cys	16502	37.36	[2, 858, 0, 15642]	CT CA	0.95
ccmC	467	156	GCU→GUU	Ala→Val	15320	36.61	[0, 4706, 3, 10611]	CT CG	0.69
ccmC	473	158	CCG→CUG	Pro→Leu	17134	37.17	[4, 894, 2, 16234]	CT CA CG	0.95
ccmC	497	166	UCU→UUU	Ser→Phe	17862	36.75	[0, 1239, 1, 16622]	CT CG	0.93
ccmC	521	174	UCG→UUG	Ser→Leu	16056	37.21	[0, 482, 0, 15574]	CT	0.97
ccmC	568	190	CCU→UCU	Pro→Ser	13303	36.83	[3, 6891, 0, 6409]	CT CA	0.48
ccmC	575	192	CCC→CUC	Pro→Leu	12860	36.77	[0, 4802, 1, 8057]	CT CG	0.63
ccmC	605	202	UCC→UUC	Ser→Phe	12423	36.95	[1, 277, 0, 12145]	CT CA	0.98
ccmC	608	203	CCC→CUC	Pro→Leu	12505	37.16	[0, 225, 1, 12279]	CT CG	0.98
ccmC	614	205	UCA→UUA	Ser→Leu	12586	37.47	[0, 2967, 0, 9619]	CT	0.76
ccmC	619	207	CCU→UCU	Pro→Ser	11337	37.13	[2, 916, 2, 10417]	CT CG CA	0.92
ccmC	624	208	AUC→AUU	Ile→Ile	11060	37.26	[1, 407, 0, 10652]	CT CA	0.96
ccmC	650	217	CCU→CUU	Pro→Leu	7849	37.36	[2, 142, 1, 7704]	CT CA CG	0.98
ccmC	665	222	CCC→CUC	Pro→Leu	6896	36.92	[0, 256, 1, 6639]	CT CG	0.96
ccmFC	38	13	UCC→UUU	Ser→Phe	4333	37.04	[0, 134, 0, 4199]	CT	0.97
ccmFC	39	13	UCC→UUU	Ser→Phe	4323	37.16	[0, 1393, 0, 2930]	CT	0.68
ccmFC	50	17	CCU→CUU	Pro→Leu	4305	36.65	[0, 276, 2, 4027]	CT CG	0.94
ccmFC	52	18	CGU→UGU	Arg→Cys	4515	37.07	[1, 318, 1, 4195]	CT CA CG	0.93
ccmFC	87	29	UUC→UUU	Phe→Phe	4162	36.68	[0, 3202, 0, 960]	CT	0.23
ccmFC	103	35	CCC→UCC	Pro→Ser	4571	36.66	[1, 140, 0, 4430]	CT CA	0.97
ccmFC	119	40	UCU→UUU	Ser→Phe	4348	36.97	[1, 365, 0, 3982]	CT CA	0.92
ccmFC	122	41	UCC→UUC	Ser→Phe	4414	36.94	[0, 382, 0, 4032]	CT	0.91
ccmFC	146	49	CCU→CUU	Pro→Leu	4727	37.14	[0, 137, 0, 4590]	CT	0.97
ccmFC	151	51	CCU→UCU	Pro→Ser	4593	37.1	[0, 157, 0, 4436]	CT	0.97
ccmFC	155	52	UCA→UUA	Ser→Leu	4876	37.29	[0, 393, 0, 4483]	CT	0.92
ccmFC	160	54	CCU→UCU	Pro→Ser	4702	37.03	[1, 755, 0, 3946]	CT CA	0.84
ccmFC	305	102	UCA→UUA	Ser→Leu	4592	37.25	[1, 319, 0, 4272]	CT CA	0.93
ccmFC	310	104	CGU→UGU	Arg→Cys	4833	37.42	[0, 122, 0, 4711]	CT	0.97
ccmFC	315	105	UUC→UUU	Phe→Phe	4515	36.95	[0, 2793, 1, 1721]	CT CG	0.38
ccmFC	391	131	CGU→UGU	Arg→Cys	3251	37.25	[0, 212, 0, 3039]	CT	0.93
ccmFC	406	136	CGU→UGU	Arg→Cys	3260	37.38	[0, 241, 0, 3019]	CT	0.93
ccmFC	412	138	CUC→UUC	Leu→Phe	3068	36.88	[0, 773, 1, 2294]	CT CG	0.75
ccmFC	706	236	CCA→UCA	Pro→Ser	4809	36.47	[0, 1391, 0, 3418]	CT	0.71
ccmFC	878	293	UCU→UUU	Ser→Phe	7333	36.96	[0, 369, 0, 6964]	CT	0.95
ccmFC	1139	380	CCA→CUA	Pro→Leu	5391	37.29	[0, 118, 0, 5273]	CT	0.98
ccmFC	1160	387	UCG→UUG	Ser→Leu	5419	37.31	[1, 93, 0, 5325]	CT CA	0.98
ccmFC	1259	420	UCG→UUG	Ser→Leu	4026	36.96	[1, 96, 0, 3929]	CT CA	0.98
ccmFC	1268	423	UCC→UUC	Ser→Phe	3224	35.85	[0, 79, 0, 3145]	CT	0.98
ccmFC	1315	439	CGA→UGA	Arg→End	2082	37.24	[0, 59, 0, 2023]	CT	0.97
ccmFN	29	10	UCG→UUG	Ser→Leu	7205	36.74	[0, 6374, 1, 830]	CT CG	0.12
ccmFN	38	13	CCG→CUG	Pro→Leu	8546	37.07	[0, 204, 0, 8342]	CT	0.98
ccmFN	98	33	CCU→CUU	Pro→Leu	10790	36.82	[0, 220, 1, 10569]	CT CG	0.98
ccmFN	137	46	UCG→UUG	Ser→Leu	8600	37.41	[0, 730, 0, 7870]	CT	0.92
ccmFN	142	48	CGU→UGU	Arg→Cys	8444	37.39	[2, 741, 0, 7701]	CT CA	0.91
ccmFN	151	51	CCU→UCU	Pro→Ser	9232	37.14	[0, 1062, 0, 8170]	CT	0.88
ccmFN	165	55	UCC→UCU	Ser→Ser	9305	37	[3, 8318, 2, 982]	CT CA CG	0.11
ccmFN	248	83	UCA→UUA	Ser→Leu	6868	37.23	[0, 224, 0, 6644]	CT	0.97
ccmFN	256	86	CGG→UGG	Arg→Trp	6780	36.78	[0, 130, 0, 6650]	CT	0.98
ccmFN	263	88	CCA→CUA	Pro→Leu	7283	37.2	[0, 153, 0, 7130]	CT	0.98
ccmFN	279	93	UUC→UUU	Phe→Phe	7495	36.63	[0, 218, 0, 7277]	CT	0.97
ccmFN	283	95	CUU→UUU	Leu→Phe	7816	36.98	[0, 566, 0, 7250]	CT	0.93
ccmFN	372	124	UUC→UUU	Phe→Phe	9200	36.67	[0, 7825, 2, 1373]	CT CG	0.15
ccmFN	384	128	UCC→UCU	Ser→Ser	10253	36.84	[0, 9126, 0, 1127]	CT	0.11
ccmFN	607	203	CAU→UAU	His→Tyr	8504	37.01	[1, 239, 0, 8264]	CT CA	0.97
ccmFN	610	204	CCU→UCU	Pro→Ser	8529	36.77	[0, 942, 0, 7587]	CT	0.89
ccmFN	707	236	CCU→CUU	Pro→Leu	11185	36.97	[1, 351, 0, 10833]	CT CA	0.97
ccmFN	716	239	UCA→UUA	Ser→Leu	11342	37.11	[0, 1535, 1, 9806]	CT CG	0.86
ccmFN	754	252	CGU→UGU	Arg→Cys	13169	37.1	[0, 441, 0, 12728]	CT	0.97
ccmFN	759	253	ACC→ACU	Thr→Thr	12686	36.67	[0, 10315, 2, 2369]	CT CG	0.19
ccmFN	776	259	UCA→UUA	Ser→Leu	13027	36.99	[1, 171, 0, 12855]	CT CA	0.99
ccmFN	788	263	CCA→CUA	Pro→Leu	13669	37.09	[0, 394, 1, 13274]	CT CG	0.97
ccmFN	803	268	UCA→UUA	Ser→Leu	14590	37.03	[0, 214, 0, 14376]	CT	0.99
ccmFN	952	318	CGC→UGC	Arg→Cys	12342	36.68	[0, 198, 0, 12144]	CT	0.98
ccmFN	1193	398	UCG→UUG	Ser→Leu	7297	36.82	[0, 2705, 0, 4592]	CT	0.63
ccmFN	1276	426	CGG→UGG	Arg→Trp	6109	36.93	[0, 511, 3, 5595]	CT CG	0.92
ccmFN	1304	435	CCA→CUA	Pro→Leu	6257	36.91	[9, 76, 1, 6171]	CT CA CG	0.99
ccmFN	1321	441	CAU→UAU	His→Tyr	5862	36.73	[6, 63, 1, 5792]	CT CA CG	0.99
ccmFN	1336	446	CGG→UGG	Arg→Trp	6534	36.66	[0, 166, 6, 6362]	CT CG	0.97
ccmFN	1354	452	CGG→UGG	Arg→Trp	9590	36.37	[0, 251, 8, 9331]	CT CG	0.97
ccmFN	1387	463	CGG→UGG	Arg→Trp	13036	36.83	[1, 482, 3, 12550]	CT CG CA	0.96
ccmFN	1405	469	CGU→UGU	Arg→Cys	16688	36.93	[0, 457, 1, 16230]	CT CG	0.97
ccmFN	1448	483	UCG→UUG	Ser→Leu	17880	37.06	[2, 463, 0, 17415]	CT CA	0.97
cob	180	60	UAC→UAU	Tyr→Tyr	21893	36.72	[0, 18367, 2, 3524]	CT CG	0.16
cob	286	96	CUC→UUC	Leu→Phe	20322	36.78	[0, 573, 1, 19748]	CT CG	0.97
cob	298	100	CAC→UAC	His→Tyr	20671	36.85	[1, 586, 0, 20084]	CT CA	0.97
cob	325	109	CAU→UAU	His→Tyr	21017	37.11	[0, 561, 1, 20455]	CT CG	0.97
cob	358	120	CGG→UGG	Arg→Trp	20916	37.14	[2, 490, 1, 20423]	CT CA CG	0.98
cob	407	136	ACA→AUA	Thr→Ile	19377	37.13	[0, 441, 0, 18936]	CT	0.98
cob	568	190	CAU→UAU	His→Tyr	13823	37.16	[1, 384, 1, 13437]	CT CA CG	0.97
cob	715	239	CGG→UGG	Arg→Trp	15049	36.78	[5, 276, 6, 14762]	CT CG CA	0.98
cob	725	242	UCU→UUU	Ser→Phe	15223	36.49	[0, 558, 0, 14665]	CT	0.96
cob	908	303	CCA→CUA	Pro→Leu	17747	36.99	[4, 327, 3, 17413]	CT CA CG	0.98
cob	982	328	CAU→UAU	His→Tyr	18482	36.88	[0, 523, 2, 17957]	CT CG	0.97
cob	1084	362	CCU→UCU	Pro→Ser	25776	37.02	[2, 446, 0, 25328]	CT CA	0.98
cob	1104	368	UUC→UUU	Phe→Phe	24208	36.61	[0, 21546, 11, 2651]	CT CG	0.11
cox1	11	4	CCG→CUG	Pro→Leu	14685	37.12	[0, 1127, 0, 13558]	CT	0.92
cox1	15	5	GUC→GUU	Val→Val	13063	36.38	[1, 9292, 8, 3762]	CT CG CA	0.29
cox1	242	81	UCU→UUU	Ser→Phe	21690	36.43	[1, 277, 0, 21412]	CT CA	0.99
cox1	254	85	UCU→UUU	Ser→Phe	22157	36.37	[0, 473, 0, 21684]	CT	0.98
cox1	352	118	CCA→UCA	Pro→Ser	31609	36.52	[4, 937, 0, 30668]	CT CA	0.97
cox1	443	148	UCA→UUA	Ser→Leu	28981	37.1	[0, 356, 0, 28625]	CT	0.99
cox1	452	151	UCU→UUU	Ser→Phe	29048	36.99	[0, 327, 1, 28720]	CT CG	0.99
cox1	515	172	UCC→UUC	Ser→Phe	35589	36.85	[3, 460, 1, 35125]	CT CA CG	0.99
cox1	551	184	UCA→UUA	Ser→Leu	35959	37.18	[1, 466, 0, 35492]	CT CA	0.99
cox1	575	192	CCA→CUA	Pro→Leu	32618	37.33	[4, 415, 0, 32199]	CT CA	0.99
cox1	590	197	CCA→CUA	Pro→Leu	30743	37.44	[0, 393, 4, 30346]	CT CG	0.99
cox1	668	223	UCU→UUU	Ser→Phe	18164	36.95	[0, 302, 0, 17862]	CT	0.98
cox1	715	239	CGG→UGG	Arg→Trp	20220	37	[0, 231, 0, 19989]	CT	0.99
cox1	746	249	CCC→CUC	Pro→Leu	26241	37.09	[4, 192, 0, 26045]	CT CA	0.99
cox1	761	254	UCC→UUC	Ser→Phe	25725	36.7	[0, 240, 0, 25485]	CT	0.99
cox1	868	290	CGG→UGG	Arg→Trp	35445	36.98	[1, 334, 1, 35109]	CT CG CA	0.99
cox1	1037	346	UCC→UUC	Ser→Phe	21415	36.25	[3, 461, 4, 20947]	CT CG CA	0.98
cox1	1079	360	CCG→CUG	Pro→Leu	28246	36.36	[2, 272, 3, 27969]	CT CG CA	0.99
cox1	1124	375	GCG→GUG	Ala→Val	27900	36.61	[0, 152, 1, 27747]	CT CG	0.99
cox1	1186	396	CAC→UAC	His→Tyr	33693	37.01	[0, 205, 0, 33488]	CT	0.99
cox1	1402	468	CGU→UGU	Arg→Cys	44295	37.32	[0, 195, 2, 44098]	CT CG	1
cox1	1433	478	UCA→UUA	Ser→Leu	39444	37.39	[1, 314, 0, 39129]	CT CA	0.99
cox2	16	6	CCA→UCA	Pro→Ser	11332	36.8	[1, 2418, 1, 8912]	CT CA CG	0.79
cox2	152	51	UCU→UUU	Ser→Phe	13240	36.56	[2, 158, 0, 13080]	CT CA	0.99
cox2	164	55	GCA→GUA	Ala→Val	10631	36.53	[24, 8591, 17, 1999]	CT CA CG	0.19
cox2	242	81	UCA→UUA	Ser→Leu	11886	37.07	[0, 1136, 0, 10750]	CT	0.9
cox2	244	82	CGG→UGG	Arg→Trp	11711	36.82	[0, 349, 0, 11362]	CT	0.97
cox2	334	112	CGG→UGG	Arg→Trp	17829	37.17	[1, 2840, 982, 14006]	CT CG CA	0.83
cox2	359	120	CCG→CUG	Pro→Leu	17469	37.27	[3, 1039, 1, 16426]	CT CA CG	0.94
cox2	460	154	CGG→UGG	Arg→Trp	17045	37.12	[0, 632, 1, 16412]	CT CG	0.96
cox2	524	175	ACG→AUG	Thr→Met	16601	37.21	[0, 1550, 0, 15051]	CT	0.91
cox2	557	186	UCA→UUA	Ser→Leu	15067	36.99	[2, 996, 0, 14069]	CT CA	0.93
cox2	638	213	CCU→CUU	Pro→Leu	18212	37.04	[2, 920, 0, 17290]	CT CA	0.95
cox2	713	238	UCG→UUG	Ser→Leu	17141	37.43	[0, 1570, 1, 15570]	CT CG	0.91
cox2	779	260	ACG→AUG	Thr→Met	10039	37.27	[1, 301, 1, 9736]	CT CG CA	0.97
cox2	802	268	CCU→UCU	Pro→Ser	7822	36.66	[0, 168, 0, 7654]	CT	0.98
cox2	823	275	CGG→UGG	Arg→Trp	7603	37.24	[0, 281, 0, 7322]	CT	0.96
cox3	112	38	CCA→UCA	Pro→Ser	22184	36.75	[7, 1146, 1, 21030]	CT CA CG	0.95
cox3	245	82	CCU→CUU	Pro→Leu	13300	36.32	[10, 449, 3, 12838]	CT CA CG	0.97
cox3	257	86	UCU→UUU	Ser→Phe	13586	36.48	[0, 1242, 1, 12343]	CT CG	0.91
cox3	263	88	CCG→CUG	Pro→Leu	14372	36.87	[0, 1277, 1, 13094]	CT CG	0.91
cox3	289	97	CUU→UUU	Leu→Phe	13499	36.59	[0, 939, 1, 12559]	CT CG	0.93
cox3	304	102	CGG→UGG	Arg→Trp	12424	36.84	[0, 831, 33, 11560]	CT CG	0.93
cox3	311	104	UCU→UUU	Ser→Phe	10461	36.34	[2, 1175, 2, 9282]	CT CA CG	0.89
cox3	314	105	UCU→UUU	Ser→Phe	11258	36.59	[0, 898, 0, 10360]	CT	0.92
cox3	388	130	CGG→UGG	Arg→Trp	15049	36.72	[3, 1201, 4, 13841]	CT CG CA	0.92
cox3	413	138	CCU→CUU	Pro→Leu	19271	36.8	[9, 623, 6, 18633]	CT CA CG	0.97
cox3	512	171	UCA→UUA	Ser→Leu	33418	37.04	[0, 1423, 0, 31995]	CT	0.96
cox3	566	189	UCC→UUC	Ser→Phe	36406	37	[8, 818, 3, 35577]	CT CA CG	0.98
cox3	602	201	UCC→UUC	Ser→Phe	52792	37.23	[1, 1858, 2, 50931]	CT CG CA	0.96
cox3	653	218	UCG→UUG	Ser→Leu	46380	37.56	[1, 1009, 1, 45369]	CT CG CA	0.98
cox3	754	252	CGG→UGG	Arg→Trp	11763	37.12	[0, 173, 1, 11589]	CT CG	0.99
matR	32	11	UCC→UUC	Ser→Phe	5993	36.42	[0, 1341, 1, 4651]	CT CG	0.78
matR	43	15	CCC→UCC	Pro→Ser	6173	36.33	[0, 3941, 1, 2231]	CT CG	0.36
matR	193	65	CCA→UCA	Pro→Ser	5559	36.72	[3, 1332, 0, 4224]	CT CA	0.76
matR	413	138	UCG→UUG	Ser→Leu	4022	36.85	[0, 1428, 0, 2594]	CT	0.64
matR	1700	567	CCU→CUU	Pro→Leu	8237	36.9	[1, 2298, 0, 5938]	CT CA	0.72
matR	1734	578	UAC→UAU	Tyr→Tyr	7733	36.94	[0, 440, 0, 7293]	CT	0.94
matR	1844	615	UCA→UUA	Ser→Leu	5694	37.37	[2, 489, 0, 5203]	CT CA	0.91
matR	1914	638	CUC→CUU	Leu→Leu	4478	37.16	[0, 3788, 0, 690]	CT	0.15
matR	1931	644	CCG→CUG	Pro→Leu	3594	37.05	[0, 1754, 0, 1840]	CT	0.51
mttB	42	14	UUC→UUU	Phe→Phe	3376	36.82	[0, 783, 0, 2593]	CT	0.77
mttB	79	27	CAU→UAU	His→Tyr	3759	36.99	[0, 1570, 0, 2189]	CT	0.58
mttB	88	30	CCG→UUG	Pro→Leu	3525	36.38	[1, 2223, 1, 1300]	CT CG CA	0.37
mttB	89	30	CCG→UUG	Pro→Leu	3677	36.84	[0, 1009, 2, 2666]	CT CG	0.73
mttB	100	34	CUA→UUA	Leu→Leu	3873	36.77	[1, 1680, 2, 2190]	CT CG CA	0.57
mttB	127	43	CGG→UGG	Arg→Trp	4539	36.95	[0, 587, 0, 3952]	CT	0.87
mttB	138	46	AUC→AUU	Ile→Ile	4576	36.6	[0, 4073, 2, 501]	CT CG	0.11
mttB	163	55	CGU→UGU	Arg→Cys	4774	36.74	[0, 1345, 0, 3429]	CT	0.72
mttB	174	58	UUC→UUU	Phe→Phe	4473	36.36	[0, 3962, 1, 510]	CT CG	0.11
mttB	175	59	CCG→UCG	Pro→Ser	4602	36.55	[0, 1340, 4, 3258]	CT CG	0.71
mttB	191	64	UCU→UUU	Ser→Phe	4832	36.87	[0, 377, 0, 4455]	CT	0.92
mttB	194	65	CCA→CUA	Pro→Leu	5015	37.22	[0, 947, 0, 4068]	CT	0.81
mttB	251	84	UCA→UUA	Ser→Leu	4553	37.04	[0, 88, 0, 4465]	CT	0.98
mttB	263	88	UCC→UUC	Ser→Phe	4000	36.6	[1, 174, 0, 3825]	CT CA	0.96
mttB	265	89	CCG→UCG	Pro→Ser	4081	36.81	[1, 331, 1, 3748]	CT CA CG	0.92
mttB	299	100	UCU→UUU	Ser→Phe	5077	36.6	[1, 777, 1, 4298]	CT CA CG	0.85
mttB	306	102	UUC→UUU	Phe→Phe	4974	36.59	[0, 4457, 1, 516]	CT CG	0.1
mttB	325	109	CAU→UAU	His→Tyr	5703	36.91	[0, 354, 0, 5349]	CT	0.94
mttB	390	130	UUC→UUU	Phe→Phe	6079	36.31	[0, 5357, 1, 721]	CT CG	0.12
mttB	407	136	UCU→UUU	Ser→Phe	5996	36.37	[1, 4607, 1, 1387]	CT CG CA	0.23
mttB	409	137	CGC→UGC	Arg→Cys	6497	36.99	[0, 123, 0, 6374]	CT	0.98
mttB	416	139	UCC→UUC	Ser→Phe	6405	36.81	[0, 874, 0, 5531]	CT	0.86
mttB	423	141	UUC→UUU	Phe→Phe	5967	36.23	[1, 5081, 0, 885]	CT CA	0.15
mttB	436	146	CCU→UUU	Pro→Phe	5041	36.67	[0, 757, 0, 4284]	CT	0.85
mttB	437	146	CCU→UUU	Pro→Phe	5067	36.73	[0, 579, 0, 4488]	CT	0.89
mttB	439	147	CCC→UCC	Pro→Ser	5127	36.9	[0, 68, 0, 5059]	CT	0.99
mttB	442	148	CGG→UGG	Arg→Trp	5267	37.09	[0, 441, 1, 4825]	CT CG	0.92
mttB	470	157	CCA→CUA	Pro→Leu	7132	37.26	[0, 312, 0, 6820]	CT	0.96
mttB	500	167	UCG→UUG	Ser→Leu	6894	36.97	[2, 492, 0, 6400]	CT CA	0.93
mttB	535	179	CAU→UAU	His→Tyr	6541	37.15	[2, 52, 1, 6486]	CT CA CG	0.99
mttB	560	187	UCG→UUG	Ser→Leu	8351	37.03	[0, 1567, 3, 6781]	CT CG	0.81
mttB	568	190	CUA→UUA	Leu→Leu	8037	36.49	[0, 6965, 2, 1070]	CT CG	0.13
mttB	604	202	CGU→UGU	Arg→Cys	7758	37.09	[0, 152, 1, 7605]	CT CG	0.98
mttB	611	204	CCA→CUA	Pro→Leu	7523	36.71	[0, 4752, 0, 2771]	CT	0.37
mttB	617	206	CCA→CUA	Pro→Leu	7603	37.05	[0, 277, 0, 7326]	CT	0.96
mttB	673	225	CCG→UCG	Pro→Ser	9332	36.57	[0, 1037, 0, 8295]	CT	0.89
mttB	730	244	CCU→UCU	Pro→Ser	8783	36.51	[2, 203, 8, 8570]	CT CG CA	0.98
mttB	776	259	UCG→UUG	Ser→Leu	9798	36.81	[1, 877, 2, 8918]	CT CG CA	0.91
nad1	2	1	ACG→AUG	Thr→Met	9031	36.8	[1, 3194, 0, 5836]	CT CA	0.65
nad1	40	14	CUA→UUA	Leu→Leu	9529	36.63	[0, 2638, 0, 6891]	CT	0.72
nad1	167	56	UCG→UUG	Ser→Leu	11178	36.62	[2, 405, 1, 10770]	CT CA CG	0.96
nad1	215	72	UCC→UUC	Ser→Phe	14042	36.91	[1, 324, 1, 13716]	CT CG CA	0.98
nad1	307	103	CUG→UUG	Leu→Leu	15465	36.72	[0, 645, 0, 14820]	CT	0.96
nad1	376	126	CGG→UGG	Arg→Trp	12634	36.88	[3, 293, 3, 12335]	CT CA CG	0.98
nad1	490	164	CCC→UCU	Pro→Ser	13760	36.54	[1, 472, 1, 13286]	CT CA CG	0.97
nad1	492	164	CCC→UCU	Pro→Ser	13744	36.8	[5, 3754, 0, 9985]	CT CA	0.73
nad1	493	165	CGU→UGU	Arg→Cys	14630	37.15	[2, 272, 0, 14356]	CT CA	0.98
nad1	500	167	UCG→UUG	Ser→Leu	15983	37.22	[1, 712, 0, 15270]	CT CA	0.96
nad1	536	179	UCC→UUU	Ser→Phe	16158	36.31	[2, 633, 4, 15519]	CT CG CA	0.96
nad1	537	179	UCC→UUU	Ser→Phe	16803	36.65	[2, 11563, 2, 5236]	CT CA CG	0.31
nad1	573	191	UUC→UUU	Phe→Phe	20262	37.12	[0, 475, 0, 19787]	CT	0.98
nad1	580	194	CGU→UGU	Arg→Cys	20444	37.15	[0, 933, 1, 19510]	CT CG	0.95
nad1	635	212	UCA→UUA	Ser→Leu	20986	36.99	[0, 692, 1, 20293]	CT CG	0.97
nad1	674	225	UCU→UUU	Ser→Phe	17258	36.26	[4, 1094, 2, 16158]	CT CA CG	0.94
nad1	734	245	UCG→UUG	Ser→Leu	23704	37.01	[0, 337, 0, 23367]	CT	0.99
nad1	740	247	UCU→UUU	Ser→Phe	23323	36.91	[2, 480, 0, 22841]	CT CA	0.98
nad1	743	248	CCA→CUA	Pro→Leu	25263	37.32	[0, 444, 0, 24819]	CT	0.98
nad1	755	252	CCG→CUG	Pro→Leu	25614	36.6	[10, 684, 8, 24912]	CT CA CG	0.97
nad1	802	268	CGG→UGG	Arg→Trp	21907	37.3	[2, 543, 0, 21362]	CT CA	0.98
nad1	823	275	CUC→UUC	Leu→Phe	20357	36.97	[0, 1098, 1, 19258]	CT CG	0.95
nad1	898	300	CGG→UGG	Arg→Trp	13733	36.92	[8, 166, 1, 13558]	CT CA CG	0.99
nad1	909	303	UUC→UUU	Phe→Phe	12290	36.78	[0, 10549, 1, 1740]	CT CG	0.14
nad1	928	310	CGG→UGG	Arg→Trp	11671	37.23	[12, 452, 6, 11201]	CT CA CG	0.96
nad1	937	313	CCC→UCC	Pro→Ser	10270	36.66	[5, 269, 1, 9995]	CT CA CG	0.97
nad2	26	9	UCC→UUC	Ser→Phe	6345	36.73	[3, 319, 0, 6023]	CT CA	0.95
nad2	56	19	UCC→UUC	Ser→Phe	7448	36.97	[0, 95, 0, 7353]	CT	0.99
nad2	223	75	CUU→UUU	Leu→Phe	6339	36.83	[1, 483, 0, 5855]	CT CA	0.92
nad2	252	84	UUC→UUU	Phe→Phe	6158	36.71	[0, 78, 1, 6079]	CT CG	0.99
nad2	303	101	UUC→UUU	Phe→Phe	4285	36.67	[0, 1995, 0, 2290]	CT	0.53
nad2	308	103	UCU→UUU	Ser→Phe	4359	36.64	[0, 85, 0, 4274]	CT	0.98
nad2	311	104	UCC→UUC	Ser→Phe	4454	36.69	[0, 239, 0, 4215]	CT	0.95
nad2	356	119	CCA→CUA	Pro→Leu	5417	37.12	[0, 82, 0, 5335]	CT	0.98
nad2	361	121	CCU→UCU	Pro→Ser	5321	36.85	[0, 206, 0, 5115]	CT	0.96
nad2	367	123	CGC→UGC	Arg→Cys	5553	37	[1, 318, 0, 5234]	CT CA	0.94
nad2	394	132	CAU→UAU	His→Tyr	5613	36.99	[0, 121, 0, 5492]	CT	0.98
nad2	401	134	UCA→UUA	Ser→Leu	5957	37.09	[2, 162, 0, 5793]	CT CA	0.97
nad2	428	143	CCU→CUU	Pro→Leu	6216	36.69	[1, 73, 0, 6142]	CT CA	0.99
nad2	497	166	UCG→UUG	Ser→Leu	7811	36.78	[0, 129, 1, 7681]	CT CG	0.98
nad2	523	175	CCC→UCC	Pro→Ser	9035	36.69	[0, 72, 0, 8963]	CT	0.99
nad2	788	263	UCU→UUU	Ser→Phe	10065	36.89	[0, 539, 0, 9526]	CT	0.95
nad2	800	267	UCA→UUA	Ser→Leu	10763	37.2	[1, 225, 0, 10537]	CT CA	0.98
nad2	809	270	UCU→UUU	Ser→Phe	10531	36.97	[0, 225, 0, 10306]	CT	0.98
nad2	920	307	CCU→CUU	Pro→Leu	11008	36.8	[0, 245, 0, 10763]	CT	0.98
nad2	928	310	CAU→UAU	His→Tyr	11798	37.13	[0, 426, 0, 11372]	CT	0.96
nad2	958	320	CGU→UGU	Arg→Cys	13235	37.33	[0, 189, 0, 13046]	CT	0.99
nad2	962	321	ACU→AUU	Thr→Ile	12626	36.8	[0, 440, 0, 12186]	CT	0.97
nad2	1058	353	UCA→UUA	Ser→Leu	12690	37.19	[0, 577, 0, 12113]	CT	0.95
nad2	1074	358	ACC→ACU	Thr→Thr	9717	36.25	[4, 8231, 3, 1479]	CT CA CG	0.15
nad2	1127	376	UCG→UUG	Ser→Leu	9516	37.07	[0, 460, 0, 9056]	CT	0.95
nad2	1246	416	CCA→UUA	Pro→Leu	5747	36.53	[0, 522, 2, 5223]	CT CG	0.91
nad2	1247	416	CCA→UUA	Pro→Leu	5968	36.93	[0, 659, 0, 5309]	CT	0.89
nad2	1298	433	GCG→GUG	Ala→Val	7950	36.83	[0, 73, 0, 7877]	CT	0.99
nad2	1336	446	CUA→UUA	Leu→Leu	8889	36.66	[0, 7658, 3, 1228]	CT CG	0.14
nad2	1400	467	UCA→UUA	Ser→Leu	10301	37.48	[0, 176, 0, 10125]	CT	0.98
nad2	1403	468	UCC→UUC	Ser→Phe	10178	37.31	[0, 138, 0, 10040]	CT	0.99
nad2	1416	472	CCC→CCU	Pro→Pro	9279	37.03	[2, 940, 0, 8337]	CT CA	0.9
nad2	1457	486	UCA→UUA	Ser→Leu	7112	37.47	[0, 42, 1, 7069]	CT CG	0.99
nad3	5	2	UCA→UUA	Ser→Leu	6209	36.72	[0, 636, 0, 5573]	CT	0.9
nad3	44	15	CCG→CUG	Pro→Leu	7273	36.91	[1, 406, 0, 6866]	CT CA	0.94
nad3	80	27	CCA→CUA	Pro→Leu	7459	37.11	[0, 961, 0, 6498]	CT	0.87
nad3	146	49	UCC→UUC	Ser→Phe	8406	36.74	[0, 624, 1, 7781]	CT CG	0.93
nad3	208	70	CCU→UUU	Pro→Phe	7374	37.05	[0, 715, 1, 6658]	CT CG	0.9
nad3	209	70	CCU→UUU	Pro→Phe	7329	37.04	[1, 689, 0, 6639]	CT CA	0.91
nad3	215	72	CCG→CUG	Pro→Leu	7211	37.13	[0, 1062, 1, 6148]	CT CG	0.85
nad3	247	83	CCU→UCU	Pro→Ser	6271	36.57	[1, 1305, 1, 4964]	CT CA CG	0.79
nad3	251	84	CCC→CUC	Pro→Leu	6177	36.66	[2, 625, 1, 5549]	CT CA CG	0.9
nad3	266	89	UCG→UUG	Ser→Leu	6786	37.26	[0, 937, 1, 5848]	CT CG	0.86
nad3	275	92	UCU→UUU	Ser→Phe	6339	36.68	[0, 919, 0, 5420]	CT	0.86
nad3	317	106	UCU→UUU	Ser→Phe	4216	36.64	[0, 574, 0, 3642]	CT	0.86
nad3	344	115	UCG→UUG	Ser→Leu	3559	37	[0, 620, 0, 2939]	CT	0.83
nad3	349	117	CGG→UGG	Arg→Trp	3525	37.04	[0, 906, 0, 2619]	CT	0.74
nad4	29	10	UCU→UUU	Ser→Phe	9240	37.14	[0, 695, 0, 8545]	CT	0.92
nad4	44	15	CCU→CUU	Pro→Leu	11007	36.97	[6, 310, 4, 10687]	CT CA CG	0.97
nad4	74	25	ACU→AUU	Thr→Ile	8702	36.8	[0, 798, 0, 7904]	CT	0.91
nad4	107	36	CCG→CUG	Pro→Leu	8313	36.98	[1, 325, 8, 7979]	CT CG CA	0.96
nad4	158	53	CCU→CUU	Pro→Leu	7819	36.91	[4, 79, 0, 7736]	CT CA	0.99
nad4	164	55	CCU→CUU	Pro→Leu	7408	36.61	[0, 719, 0, 6689]	CT	0.9
nad4	166	56	CGG→UGG	Arg→Trp	7706	37.05	[0, 311, 1, 7394]	CT CG	0.96
nad4	197	66	UCU→UUU	Ser→Phe	5691	36.63	[0, 318, 0, 5373]	CT	0.94
nad4	362	121	ACA→AUA	Thr→Ile	6750	36.96	[0, 416, 2, 6332]	CT CG	0.94
nad4	368	123	UCU→UUU	Ser→Phe	6691	36.72	[0, 276, 2, 6413]	CT CG	0.96
nad4	376	126	CGU→UGU	Arg→Cys	7102	37.16	[1, 452, 0, 6649]	CT CA	0.94
nad4	385	129	CUA→UUA	Leu→Leu	6909	36.4	[0, 6148, 4, 757]	CT CG	0.11
nad4	403	135	CGC→UGC	Arg→Cys	6697	36.94	[1, 367, 0, 6329]	CT CA	0.95
nad4	416	139	CCU→CUU	Pro→Leu	6166	36.88	[0, 542, 0, 5624]	CT	0.91
nad4	433	145	CUU→UUU	Leu→Phe	5741	36.83	[0, 709, 0, 5032]	CT	0.88
nad4	436	146	CCC→UUC	Pro→Phe	5667	37.02	[0, 347, 1, 5319]	CT CG	0.94
nad4	437	146	CCC→UUC	Pro→Phe	5568	36.84	[0, 389, 0, 5179]	CT	0.93
nad4	449	150	CCA→CUA	Pro→Leu	5832	37.09	[12, 337, 9, 5474]	CT CA CG	0.94
nad4	501	167	AUC→AUU	Ile→Ile	7341	36.8	[0, 6174, 0, 1167]	CT	0.16
nad4	608	203	UCA→UUA	Ser→Leu	7244	37.25	[0, 82, 0, 7162]	CT	0.99
nad4	659	220	UCU→UUU	Ser→Phe	6218	36.66	[0, 200, 0, 6018]	CT	0.97
nad4	836	279	UCC→UUC	Ser→Phe	5863	36.68	[1, 327, 0, 5535]	CT CA	0.94
nad4	856	286	CCA→UUA	Pro→Leu	7371	36.86	[0, 216, 0, 7155]	CT	0.97
nad4	857	286	CCA→UUA	Pro→Leu	7493	37.11	[0, 478, 0, 7015]	CT	0.94
nad4	896	299	UCA→UUA	Ser→Leu	9835	37.04	[1, 206, 0, 9628]	CT CA	0.98
nad4	977	326	CCG→CUG	Pro→Leu	10440	36.9	[0, 1361, 65, 9014]	CT CG	0.87
nad4	1006	336	CCA→UUA	Pro→Leu	8562	36.67	[0, 788, 0, 7774]	CT	0.91
nad4	1007	336	CCA→UUA	Pro→Leu	8796	36.92	[0, 356, 0, 8440]	CT	0.96
nad4	1009	337	CCG→UUG	Pro→Leu	8399	36.52	[0, 1942, 0, 6457]	CT	0.77
nad4	1010	337	CCG→UUG	Pro→Leu	9252	37.08	[0, 689, 0, 8563]	CT	0.93
nad4	1101	367	UAC→UAU	Tyr→Tyr	15015	36.89	[0, 1748, 2, 13265]	CT CG	0.88
nad4	1109	370	UCA→UUA	Ser→Leu	15336	36.94	[0, 420, 0, 14916]	CT	0.97
nad4	1129	377	CUC→UUC	Leu→Phe	15122	36.65	[0, 303, 1, 14818]	CT CG	0.98
nad4	1142	381	UCC→UUC	Ser→Phe	14492	36.89	[0, 356, 0, 14136]	CT	0.98
nad4	1148	383	UCU→UUU	Ser→Phe	14099	36.86	[0, 558, 0, 13541]	CT	0.96
nad4	1151	384	UCC→UUU	Ser→Phe	14173	36.88	[0, 626, 0, 13547]	CT	0.96
nad4	1152	384	UCC→UUU	Ser→Phe	13671	36.6	[1, 11676, 0, 1994]	CT CA	0.15
nad4	1172	391	UCA→UUA	Ser→Leu	13068	36.9	[0, 209, 1, 12858]	CT CG	0.98
nad4	1205	402	CCC→CUU	Pro→Leu	11657	36.91	[0, 276, 0, 11381]	CT	0.98
nad4	1206	402	CCC→CUU	Pro→Leu	11631	37.05	[1, 1382, 1, 10247]	CT CG CA	0.88
nad4	1307	436	GCG→GUG	Ala→Val	12447	36.9	[0, 303, 6, 12138]	CT CG	0.98
nad4	1373	458	UCC→UUC	Ser→Phe	10423	37	[0, 487, 0, 9936]	CT	0.95
nad4	1417	473	CAC→UAC	His→Tyr	8406	37.17	[0, 188, 0, 8218]	CT	0.98
nad4	1433	478	CCG→CUG	Pro→Leu	7673	37.17	[3, 97, 7, 7566]	CT CG CA	0.99
nad4L	2	1	ACG→AUG	Thr→Met	4992	36.96	[2, 224, 7, 4759]	CT CG CA	0.96
nad4L	8	3	CCU→CUU	Pro→Leu	4505	36.95	[4, 238, 0, 4263]	CT CA	0.95
nad4L	36	12	AUC→AUU	Ile→Ile	4774	36.62	[0, 3553, 2, 1219]	CT CG	0.26
nad4L	41	14	UCU→UUU	Ser→Phe	5140	36.97	[0, 116, 0, 5024]	CT	0.98
nad4L	55	19	CGG→UGG	Arg→Trp	5169	37.01	[1, 202, 0, 4966]	CT CA	0.96
nad4L	86	29	CCU→CUU	Pro→Leu	5575	36.74	[0, 113, 1, 5461]	CT CG	0.98
nad4L	95	32	UCA→UUA	Ser→Leu	5701	36.72	[0, 210, 0, 5491]	CT	0.96
nad4L	100	34	CCA→UCA	Pro→Ser	5514	36.06	[0, 191, 1, 5322]	CT CG	0.97
nad4L	110	37	UCA→UUA	Ser→Leu	6307	36.77	[0, 90, 1, 6216]	CT CG	0.99
nad4L	158	53	UCG→UUG	Ser→Leu	9161	37.07	[0, 203, 1, 8957]	CT CG	0.98
nad4L	179	60	UCA→UUA	Ser→Leu	10318	36.88	[2, 847, 0, 9469]	CT CA	0.92
nad4L	188	63	UCA→UUA	Ser→Leu	10985	37.07	[1, 710, 0, 10274]	CT CA	0.94
nad4L	197	66	CCA→CUA	Pro→Leu	11189	37.13	[0, 553, 0, 10636]	CT	0.95
nad4L	281	94	UCU→UUU	Ser→Phe	12612	37.14	[0, 85, 0, 12527]	CT	0.99
nad5	155	52	CCG→CUG	Pro→Leu	8936	37.16	[2, 193, 2, 8739]	CT CA CG	0.98
nad5	242	81	CCG→CUG	Pro→Leu	8710	37.05	[11, 756, 3, 7940]	CT CA CG	0.91
nad5	272	91	UCC→UUC	Ser→Phe	8200	36.93	[1, 117, 0, 8082]	CT CA	0.99
nad5	358	120	CUU→UUU	Leu→Phe	5440	37.02	[0, 221, 0, 5219]	CT	0.96
nad5	374	125	CCA→CUA	Pro→Leu	5768	37.21	[0, 261, 0, 5507]	CT	0.95
nad5	398	133	UCU→UUU	Ser→Phe	5879	36.65	[0, 65, 0, 5814]	CT	0.99
nad5	494	165	ACA→AUA	Thr→Ile	9015	36.66	[0, 277, 0, 8738]	CT	0.97
nad5	506	169	CCU→CUU	Pro→Leu	10407	36.62	[0, 532, 0, 9875]	CT	0.95
nad5	539	180	CCU→CUU	Pro→Leu	12093	36.84	[1, 468, 1, 11623]	CT CG CA	0.96
nad5	548	183	UCG→UUG	Ser→Leu	11754	36.89	[0, 472, 2, 11280]	CT CG	0.96
nad5	553	185	CGU→UGU	Arg→Cys	11991	36.65	[0, 628, 2, 11361]	CT CG	0.95
nad5	598	200	CGU→UGU	Arg→Cys	11995	36.99	[1, 140, 0, 11854]	CT CA	0.99
nad5	608	203	GCC→GUU	Ala→Val	10739	36.13	[1, 169, 1, 10568]	CT CG CA	0.98
nad5	609	203	GCC→GUU	Ala→Val	10694	36.22	[0, 5754, 3, 4937]	CT CG	0.46
nad5	629	210	UCU→UUU	Ser→Phe	12428	36.66	[0, 197, 0, 12231]	CT	0.98
nad5	676	226	CUU→UUU	Leu→Phe	12959	37	[0, 129, 1, 12829]	CT CG	0.99
nad5	699	233	UCC→UCU	Ser→Ser	13178	36.63	[4, 8463, 3, 4708]	CT CA CG	0.36
nad5	713	238	UCG→UUG	Ser→Leu	13248	36.62	[0, 137, 0, 13111]	CT	0.99
nad5	725	242	UCA→UUA	Ser→Leu	13693	36.71	[5, 277, 1, 13410]	CT CA CG	0.98
nad5	835	279	CCA→UCA	Pro→Ser	17499	36.92	[1, 166, 1, 17331]	CT CG CA	0.99
nad5	863	288	UCU→UUU	Ser→Phe	15946	36.82	[1, 82, 0, 15863]	CT CA	0.99
nad5	875	292	ACG→AUG	Thr→Met	16278	37.05	[1, 479, 1, 15797]	CT CG CA	0.97
nad5	1400	467	UCA→UUA	Ser→Leu	11329	37.27	[3, 295, 0, 11031]	CT CA	0.97
nad5	1490	497	CCC→CUC	Pro→Leu	14278	36.71	[6, 371, 1, 13900]	CT CA CG	0.97
nad5	1550	517	ACC→AUC	Thr→Ile	17195	36.48	[1, 1011, 0, 16183]	CT CA	0.94
nad5	1568	523	CCG→CUG	Pro→Leu	19904	37.1	[0, 1559, 3, 18342]	CT CG	0.92
nad5	1580	527	UCA→UUA	Ser→Leu	21156	36.96	[0, 1449, 0, 19707]	CT	0.93
nad5	1589	530	UCU→UUU	Ser→Phe	21043	36.72	[1, 1465, 0, 19577]	CT CA	0.93
nad5	1610	537	CCC→CUC	Pro→Leu	23300	36.97	[2, 444, 0, 22854]	CT CA	0.98
nad5	1895	632	UCA→UUA	Ser→Leu	11758	37.27	[6, 476, 3, 11273]	CT CA CG	0.96
nad5	1916	639	UCU→UUU	Ser→Phe	8800	37.23	[0, 215, 0, 8585]	CT	0.98
nad5	1918	640	CGU→UGU	Arg→Cys	8836	37.49	[0, 274, 0, 8562]	CT	0.97
nad5	1958	653	UCG→UUG	Ser→Leu	7128	37.2	[0, 127, 0, 7001]	CT	0.98
nad6	26	9	CCU→CUU	Pro→Leu	10986	36.72	[4, 113, 0, 10869]	CT CA	0.99
nad6	53	18	GCA→GUA	Ala→Val	11596	36.88	[0, 263, 2, 11331]	CT CG	0.98
nad6	88	30	CCC→UUC	Pro→Phe	9906	36.8	[0, 174, 0, 9732]	CT	0.98
nad6	89	30	CCC→UUC	Pro→Phe	9809	36.81	[0, 576, 0, 9233]	CT	0.94
nad6	95	32	CCA→CUA	Pro→Leu	10573	37.25	[0, 343, 0, 10230]	CT	0.97
nad6	103	35	CGC→UGC	Arg→Cys	10547	37.12	[0, 167, 0, 10380]	CT	0.98
nad6	146	49	UCC→UUC	Ser→Phe	10233	36.67	[0, 450, 0, 9783]	CT	0.96
nad6	161	54	CCA→CUA	Pro→Leu	10584	37.24	[2, 471, 1, 10110]	CT CA CG	0.96
nad6	169	57	CAU→UAU	His→Tyr	10365	37.05	[0, 235, 0, 10130]	CT	0.98
nad6	191	64	UCA→UUA	Ser→Leu	9177	37.04	[0, 43, 0, 9134]	CT	1
nad6	446	149	UCC→UUC	Ser→Phe	10873	37.03	[0, 46, 0, 10827]	CT	1
nad6	463	155	CCG→UCG	Pro→Ser	10096	36.4	[1, 79, 0, 10016]	CT CA	0.99
nad7	33	11	UUC→UUU	Phe→Phe	8499	37.14	[0, 7396, 0, 1103]	CT	0.13
nad7	38	13	UCG→UUG	Ser→Leu	8722	37.47	[0, 769, 0, 7953]	CT	0.91
nad7	45	15	UUC→UUU	Phe→Phe	8437	37.24	[0, 7461, 1, 975]	CT CG	0.12
nad7	77	26	UCA→UUA	Ser→Leu	6089	37.49	[0, 321, 0, 5768]	CT	0.95
nad7	83	28	UCA→UUA	Ser→Leu	5911	37.41	[0, 646, 0, 5265]	CT	0.89
nad7	200	67	UCU→UUU	Ser→Phe	5130	36.87	[0, 96, 0, 5034]	CT	0.98
nad7	224	75	ACG→AUG	Thr→Met	8896	36.86	[0, 197, 0, 8699]	CT	0.98
nad7	244	82	CAU→UAU	His→Tyr	10645	36.85	[1, 247, 1, 10396]	CT CA CG	0.98
nad7	251	84	UCA→UUA	Ser→Leu	10829	36.99	[0, 549, 0, 10280]	CT	0.95
nad7	315	105	UUC→UUU	Phe→Phe	12363	36.55	[0, 10729, 0, 1634]	CT	0.13
nad7	316	106	CGU→UGU	Arg→Cys	13477	37.15	[1, 139, 0, 13337]	CT CA	0.99
nad7	335	112	UCA→UUA	Ser→Leu	15057	37.07	[2, 241, 0, 14814]	CT CA	0.98
nad7	344	115	UCA→UUA	Ser→Leu	15566	37.08	[0, 377, 1, 15188]	CT CG	0.98
nad7	383	128	UCA→UUA	Ser→Leu	15067	36.84	[0, 182, 0, 14885]	CT	0.99
nad7	432	144	UUC→UUU	Phe→Phe	19540	36.54	[0, 16102, 4, 3434]	CT CG	0.18
nad7	533	178	UCC→UUC	Ser→Phe	27663	36.89	[4, 567, 1, 27091]	CT CA CG	0.98
nad7	578	193	UCA→UUA	Ser→Leu	24948	37.1	[0, 425, 1, 24522]	CT CG	0.98
nad7	679	227	CCA→UCA	Pro→Ser	12076	36.07	[17, 1514, 10, 10535]	CT CA CG	0.87
nad7	698	233	UCG→UUG	Ser→Leu	12260	36.71	[2, 467, 0, 11791]	CT CA	0.96
nad7	724	242	CAU→UAU	His→Tyr	15943	36.81	[4, 207, 1, 15731]	CT CA CG	0.99
nad7	739	247	CCU→UUU	Pro→Phe	16290	36.49	[0, 288, 1, 16001]	CT CG	0.98
nad7	740	247	CCU→UUU	Pro→Phe	16615	36.58	[0, 214, 1, 16400]	CT CG	0.99
nad7	769	257	CGC→UGC	Arg→Cys	21387	36.43	[0, 381, 2, 21004]	CT CG	0.98
nad7	789	263	AUC→AUU	Ile→Ile	24074	36.46	[1, 7816, 1, 16256]	CT CA CG	0.68
nad7	926	309	UCA→UUA	Ser→Leu	28377	36.85	[6, 2846, 4, 25521]	CT CA CG	0.9
nad7	963	321	UCC→UCU	Ser→Ser	28790	36.97	[0, 4323, 0, 24467]	CT	0.85
nad7	973	325	CCU→UCU	Pro→Ser	26048	36.55	[1, 999, 2, 25046]	CT CG CA	0.96
nad7	1050	350	CCC→CCU	Pro→Pro	26655	36.55	[15, 2183, 10, 24447]	CT CA CG	0.92
nad7	1057	353	CGU→UGU	Arg→Cys	26718	36.8	[1, 196, 2, 26519]	CT CG CA	0.99
nad7	1079	360	UCU→UUU	Ser→Phe	23526	36.05	[7, 223, 1, 23295]	CT CA CG	0.99
nad7	1088	363	UCA→UUA	Ser→Leu	26287	37.09	[1, 1073, 0, 25213]	CT CA	0.96
nad7	1103	368	UCU→UUU	Ser→Phe	24424	36.93	[0, 728, 0, 23696]	CT	0.97
nad7	1124	375	CCA→CUA	Pro→Leu	21127	37.09	[27, 410, 26, 20664]	CT CA CG	0.98
nad7	1137	379	GUC→GUU	Val→Val	14703	37.06	[2, 888, 2, 13811]	CT CA CG	0.94
nad7	1166	389	UCU→UUU	Ser→Phe	12374	36.54	[2, 258, 1, 12113]	CT CA CG	0.98
nad9	92	31	UCU→UUU	Ser→Phe	13557	36.52	[0, 835, 0, 12722]	CT	0.94
nad9	113	38	CCA→CUA	Pro→Leu	16862	36.97	[1, 794, 1, 16066]	CT CA CG	0.95
nad9	167	56	UCG→UUG	Ser→Leu	26287	37.15	[0, 764, 0, 25523]	CT	0.97
nad9	195	65	CCC→CCU	Pro→Pro	27720	36.75	[6, 23082, 8, 4624]	CT CG CA	0.17
nad9	298	100	CCG→UCG	Pro→Ser	36545	36.7	[2, 718, 3, 35822]	CT CG CA	0.98
nad9	328	110	CGG→UGG	Arg→Trp	35393	36.66	[5, 646, 36, 34706]	CT CG CA	0.98
nad9	368	123	UCC→UUC	Ser→Phe	40552	36.85	[2, 987, 1, 39562]	CT CA CG	0.98
nad9	398	133	UCA→UUA	Ser→Leu	38497	37.15	[0, 347, 1, 38149]	CT CG	0.99
nad9	439	147	CUU→UUU	Leu→Phe	36247	36.61	[1, 1460, 2, 34784]	CT CG CA	0.96
rpl10	83	28	UCA→UUA	Ser→Leu	25478	36.88	[0, 12839, 1, 12638]	CT CG	0.5
rpl10	101	34	UCG→UUG	Ser→Leu	27782	36.76	[1, 6369, 2, 21410]	CT CG CA	0.77
rpl10	133	45	CCA→UUA	Pro→Leu	28450	36.45	[1, 12436, 4, 16009]	CT CG CA	0.56
rpl10	134	45	CCA→UUA	Pro→Leu	30506	36.91	[2, 742, 0, 29762]	CT CA	0.98
rpl10	155	52	UCA→UUA	Ser→Leu	33110	36.76	[0, 7494, 0, 25616]	CT	0.77
rpl10	239	80	UCG→UUG	Ser→Leu	38160	36.87	[2, 4691, 1, 33466]	CT CA CG	0.88
rpl10	314	105	UCA→UUA	Ser→Leu	41279	37.14	[0, 23667, 3, 17609]	CT CG	0.43
rpl10	397	133	CUU→UUU	Leu→Phe	41331	36.65	[1, 34975, 4, 6351]	CT CG CA	0.15
rpl16	46	16	CUC→UUC	Leu→Phe	3399	36.81	[0, 229, 0, 3170]	CT	0.93
rpl16	215	72	CCC→CUC	Pro→Leu	6807	37.11	[0, 347, 0, 6460]	CT	0.95
rpl16	221	74	UCG→UUG	Ser→Leu	6945	37.37	[0, 494, 0, 6451]	CT	0.93
rpl2	206	69	CCA→CUA	Pro→Leu	3338	37.33	[0, 142, 1, 3195]	CT CG	0.96
rpl2	702	234	AUC→AUU	Ile→Ile	4632	37	[0, 4041, 1, 590]	CT CG	0.13
rpl5	7	3	CCA→UCA	Pro→Ser	10497	36.71	[0, 8806, 0, 1691]	CT	0.16
rpl5	35	12	UCA→UUA	Ser→Leu	13323	37.15	[1, 493, 0, 12829]	CT CA	0.96
rpl5	54	18	CUC→CUU	Leu→Leu	14272	36.95	[2, 11247, 3, 3020]	CT CG CA	0.21
rpl5	59	20	CCG→CUG	Pro→Leu	16006	37.28	[0, 750, 0, 15256]	CT	0.95
rpl5	64	22	CAC→UAC	His→Tyr	15239	36.86	[0, 13254, 2, 1983]	CT CG	0.13
rpl5	92	31	UCG→UUG	Ser→Leu	14356	37.01	[0, 1037, 1, 13318]	CT CG	0.93
rpl5	172	58	CCG→UCG	Pro→Ser	14428	36.66	[1, 449, 0, 13978]	CT CA	0.97
rpl5	175	59	CGC→UGC	Arg→Cys	13863	36.68	[0, 758, 0, 13105]	CT	0.95
rpl5	323	108	UCG→UUG	Ser→Leu	16820	37.02	[1, 730, 2, 16087]	CT CG CA	0.96
rpl5	335	112	UCG→UUG	Ser→Leu	17139	36.96	[0, 973, 1, 16165]	CT CG	0.94
rpl5	518	173	CCA→CUA	Pro→Leu	13665	37.35	[0, 531, 0, 13134]	CT	0.96
rpl5	521	174	CCG→CUG	Pro→Leu	13507	37.31	[1, 871, 6, 12629]	CT CG CA	0.94
rps1	42	14	UCC→UCU	Ser→Ser	3815	37.24	[0, 363, 1, 3451]	CT CG	0.9
rps1	125	42	CCU→CUU	Pro→Leu	4210	36.37	[0, 369, 0, 3841]	CT	0.91
rps1	158	53	CCU→CUU	Pro→Leu	3865	36.49	[4, 235, 3, 3623]	CT CA CG	0.94
rps1	444	148	GUC→GUU	Val→Val	2584	36.91	[0, 312, 1, 2271]	CT CG	0.88
rps10	2	1	ACG→AUG	Thr→Met	11286	36.39	[2, 1325, 1, 9958]	CT CA CG	0.88
rps10	16	6	CGC→UGC	Arg→Cys	13966	36.67	[0, 921, 0, 13045]	CT	0.93
rps10	238	80	CGG→UGG	Arg→Trp	17648	37.22	[0, 506, 0, 17142]	CT	0.97
rps10	302	101	UCG→UUG	Ser→Leu	15959	37.13	[0, 545, 4, 15410]	CT CG	0.97
rps10	331	111	CGA→UGA	Arg→End	17502	37.15	[0, 1898, 1, 15603]	CT CG	0.89
rps12	284	95	UCC→UUC	Ser→Phe	2285	36.58	[0, 276, 1, 2008]	CT CG	0.88
rps13	26	9	UCA→UUA	Ser→Leu	5095	36.91	[1, 113, 0, 4981]	CT CA	0.98
rps13	56	19	UCA→UUA	Ser→Leu	5894	36.93	[0, 724, 0, 5170]	CT	0.88
rps13	100	34	CGU→UGU	Arg→Cys	8051	37.08	[0, 927, 0, 7124]	CT	0.88
rps13	287	96	UCG→UUG	Ser→Leu	8502	36.93	[0, 489, 0, 8013]	CT	0.94
rps14	194	65	UCC→UUC	Ser→Phe	21628	36.88	[1, 485, 1, 21141]	CT CG CA	0.98
rps14	271	91	CCU→UCU	Pro→Ser	21136	36.76	[0, 493, 0, 20643]	CT	0.98
rps3	92	31	UCA→UUA	Ser→Leu	7015	37.11	[0, 122, 0, 6893]	CT	0.98
rps3	96	32	GUC→GUU	Val→Val	6844	36.65	[0, 5778, 1, 1065]	CT CG	0.16
rps3	497	166	UCA→UUA	Ser→Leu	8152	36.94	[0, 242, 0, 7910]	CT	0.97
rps3	875	292	UCG→UUG	Ser→Leu	9420	36.96	[0, 728, 0, 8692]	CT	0.92
rps3	1317	439	GUC→GUU	Val→Val	5109	36.99	[6, 4270, 5, 828]	CT CA CG	0.16
rps3	1346	449	UCU→UUU	Ser→Phe	4192	36.76	[1, 3272, 0, 919]	CT CA	0.22
rps3	1349	450	CCG→CUG	Pro→Leu	4478	37.36	[0, 201, 0, 4277]	CT	0.96
rps3	1487	496	UCA→UUA	Ser→Leu	2079	37	[0, 75, 0, 2004]	CT	0.96
rps3	1573	525	CCU→UCU	Pro→Ser	2769	36.77	[0, 95, 0, 2674]	CT	0.97
rps4	38	13	UCA→UUA	Ser→Leu	1368	37.15	[0, 116, 0, 1252]	CT	0.92
rps4	49	17	CGG→UGG	Arg→Trp	1487	37.19	[0, 75, 0, 1412]	CT	0.95
rps4	257	86	CCA→CUA	Pro→Leu	4627	37.34	[0, 264, 0, 4363]	CT	0.94
rps4	261	87	CUC→CUU	Leu→Leu	4509	36.96	[0, 4025, 0, 484]	CT	0.11
rps4	266	89	CCA→CUA	Pro→Leu	4598	37.34	[0, 151, 1, 4446]	CT CG	0.97
rps4	278	93	UCG→UUG	Ser→Leu	4362	37.08	[0, 146, 0, 4216]	CT	0.97
rps4	290	97	CCG→CUG	Pro→Leu	4622	37.33	[0, 179, 0, 4443]	CT	0.96
rps4	307	103	CGU→UGU	Arg→Cys	4548	37.32	[0, 822, 0, 3726]	CT	0.82
rps4	335	112	CCG→CUG	Pro→Leu	4199	37.08	[16, 138, 3, 4042]	CT CA CG	0.97
rps4	474	158	AUC→AUU	Ile→Ile	4123	36.72	[2, 3170, 1, 950]	CT CA CG	0.23
rps4	482	161	UCA→UUA	Ser→Leu	4369	37.22	[0, 53, 0, 4316]	CT	0.99
rps4	908	303	UCG→UUG	Ser→Leu	5273	37.4	[0, 109, 0, 5164]	CT	0.98
rps4	919	307	CAU→UAU	His→Tyr	5353	37.19	[0, 91, 0, 5262]	CT	0.98
rps4	929	310	CCA→CUA	Pro→Leu	4974	37.2	[1, 827, 0, 4146]	CT CA	0.83
rps4	944	315	UCU→UUU	Ser→Phe	4764	36.89	[0, 51, 0, 4713]	CT	0.99
rps4	994	332	CCA→UUA	Pro→Leu	4032	36.69	[0, 3285, 1, 746]	CT CG	0.19
rps4	995	332	CCA→UUA	Pro→Leu	4266	37.29	[1, 101, 0, 4164]	CT CA	0.98
rps4	1004	335	CCU→CUU	Pro→Leu	4210	37.29	[0, 93, 0, 4117]	CT	0.98
rps4	1009	337	CGG→UGG	Arg→Trp	4016	37.37	[0, 117, 1, 3898]	CT CG	0.97
sdh3	54	18	CUC→CUU	Leu→Leu	4103	36.89	[0, 3648, 2, 453]	CT CG	0.11
sdh3	67	23	CCA→UCA	Pro→Ser	4116	36.81	[0, 48, 0, 4068]	CT	0.99
sdh3	74	25	UCC→UUC	Ser→Phe	4106	36.9	[0, 160, 1, 3945]	CT CG	0.96
sdh3	87	29	UCC→UCU	Ser→Ser	4705	36.48	[4, 4139, 0, 562]	CT CA	0.12
sdh3	183	61	UUC→UUU	Phe→Phe	5515	36.21	[0, 4946, 1, 568]	CT CG	0.1
sdh3	204	68	AUC→AUU	Ile→Ile	5766	36.15	[1, 4838, 1, 926]	CT CG CA	0.16
sdh3	29	10	UCG→UUG	Ser→Leu	4001	36.75	[0, 47, 0, 3954]	CT	0.99
sdh3	122	41	ACC→AUC	Thr→Ile	27545	36.77	[0, 1075, 3, 26467]	CT CG	0.96
sdh3	155	52	CCA→CUA	Pro→Leu	42528	37.4	[1, 631, 2, 41894]	CT CG CA	0.99
sdh3	203	68	UCA→UUA	Ser→Leu	46380	37.54	[7, 2467, 0, 43906]	CT CA	0.95
sdh3	259	87	CAU→UAU	His→Tyr	37383	37.45	[0, 815, 1, 36567]	CT CG	0.98
sdh3	348	116	CUC→CUU	Leu→Leu	13284	36.96	[2, 10116, 0, 3166]	CT CA	0.24
