# Supplementary figures and images for: Complete mitochondrial genome of Syzygium samarangense reveals genomic recombination, gene transfer, and RNA editing events
Source: Frontiers journal article supplement (doi:10.3389/fpls.2023.1301164), 2024-01-09

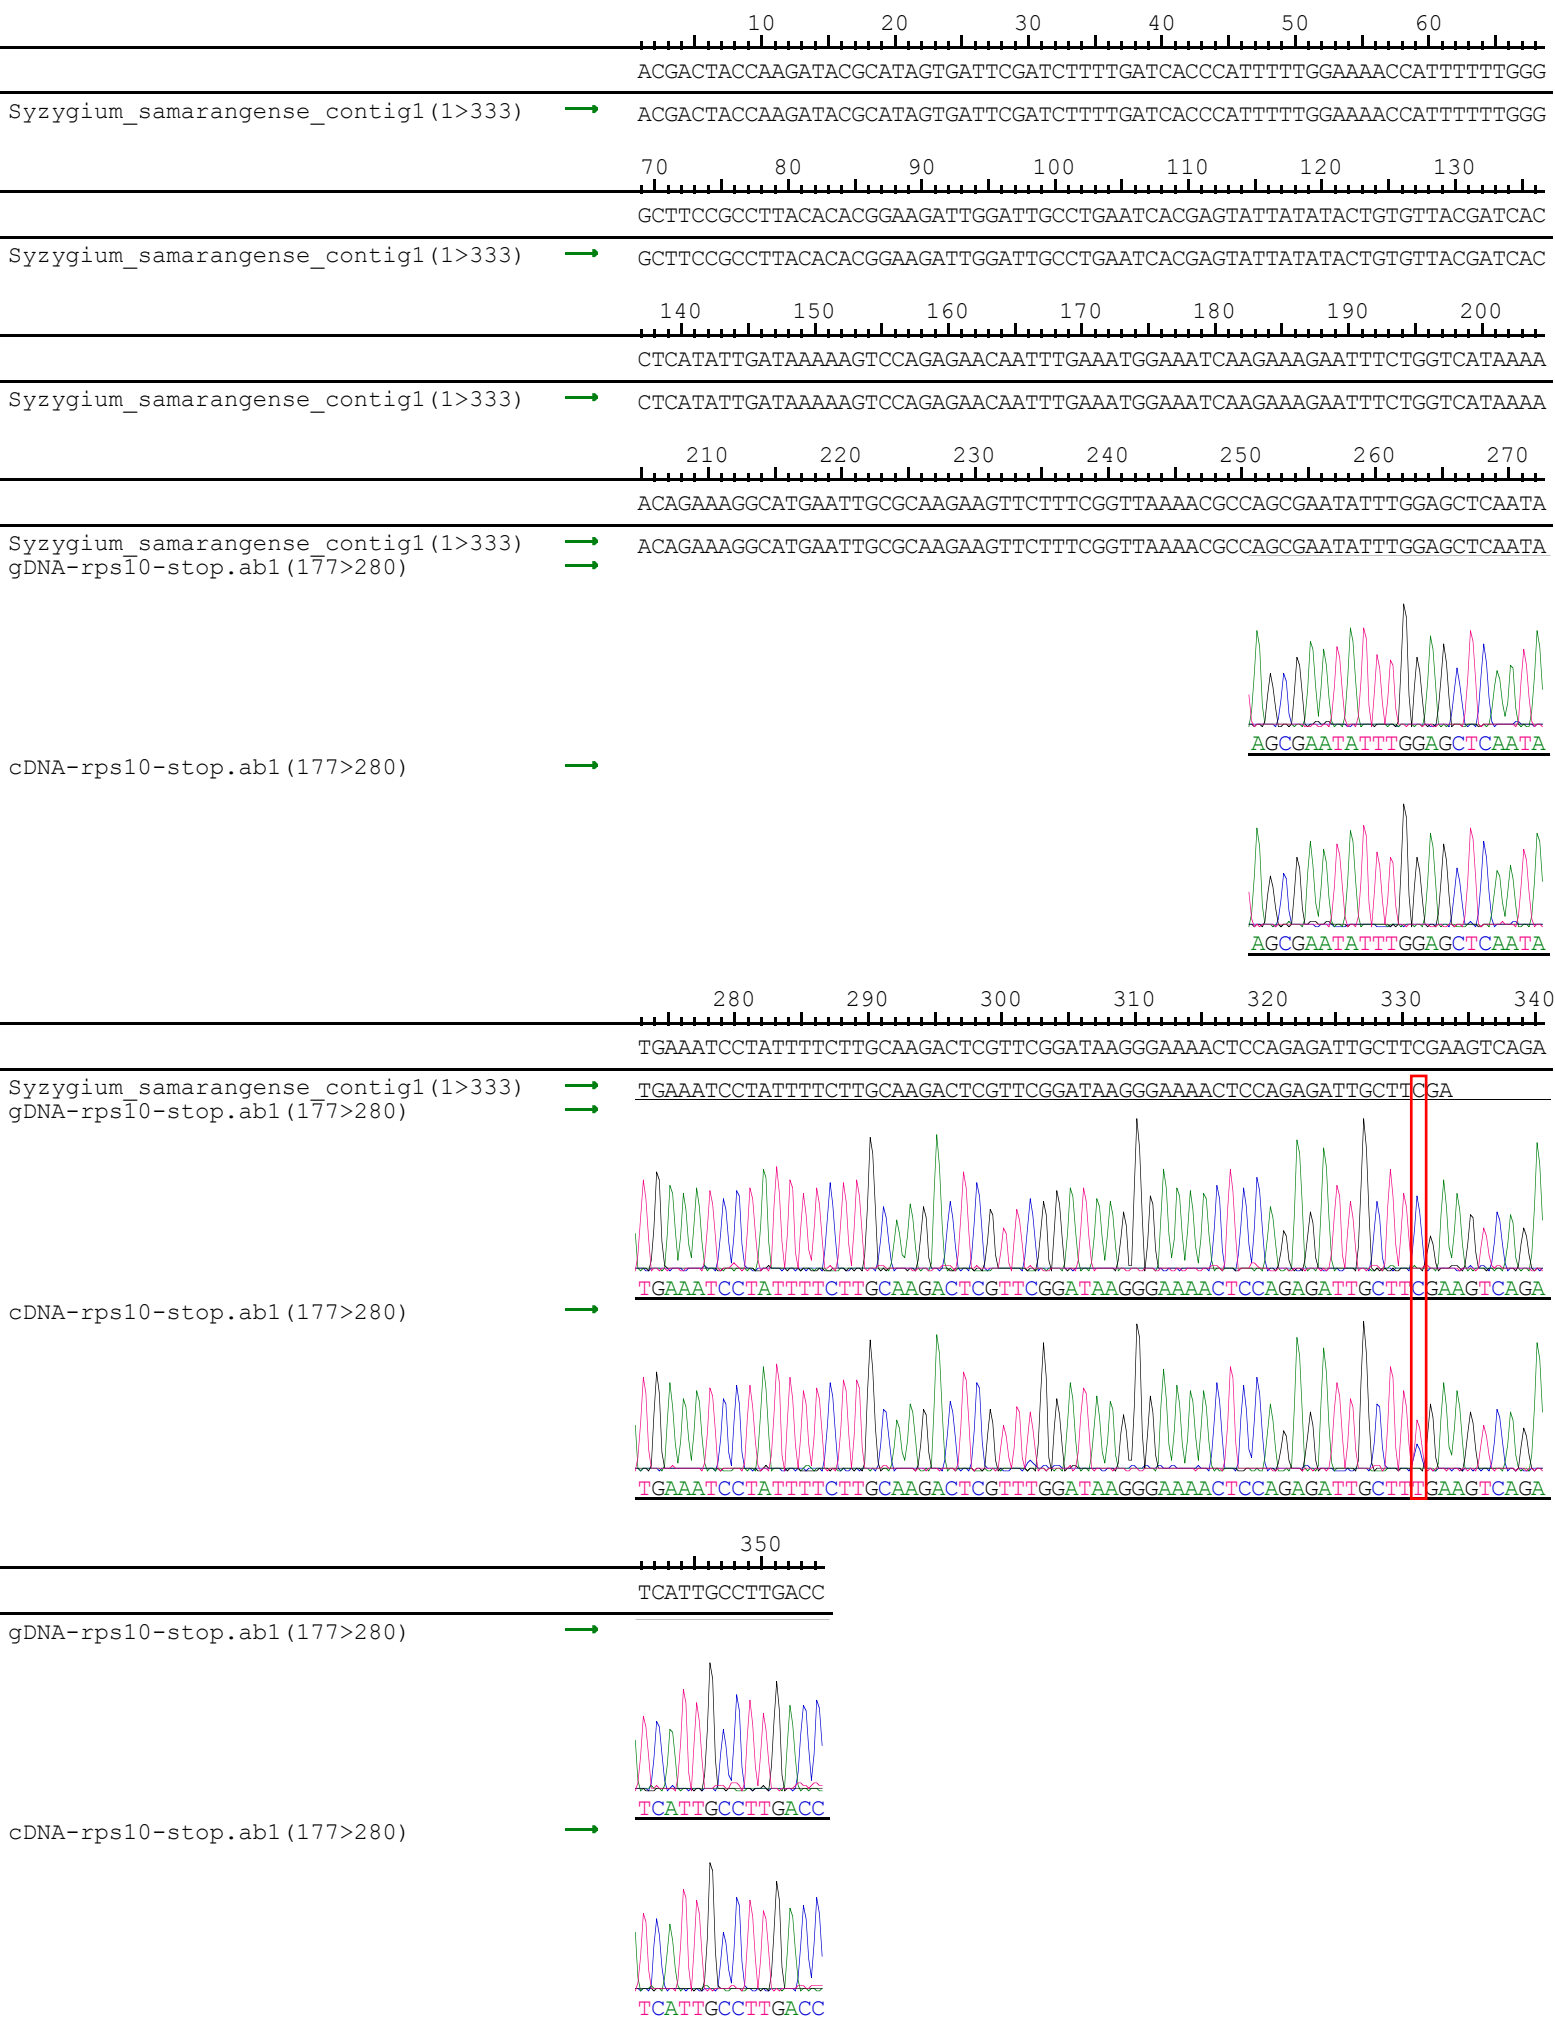

Supplement: Data_Sheet_1.zip [file Data_Sheet_1.zip]

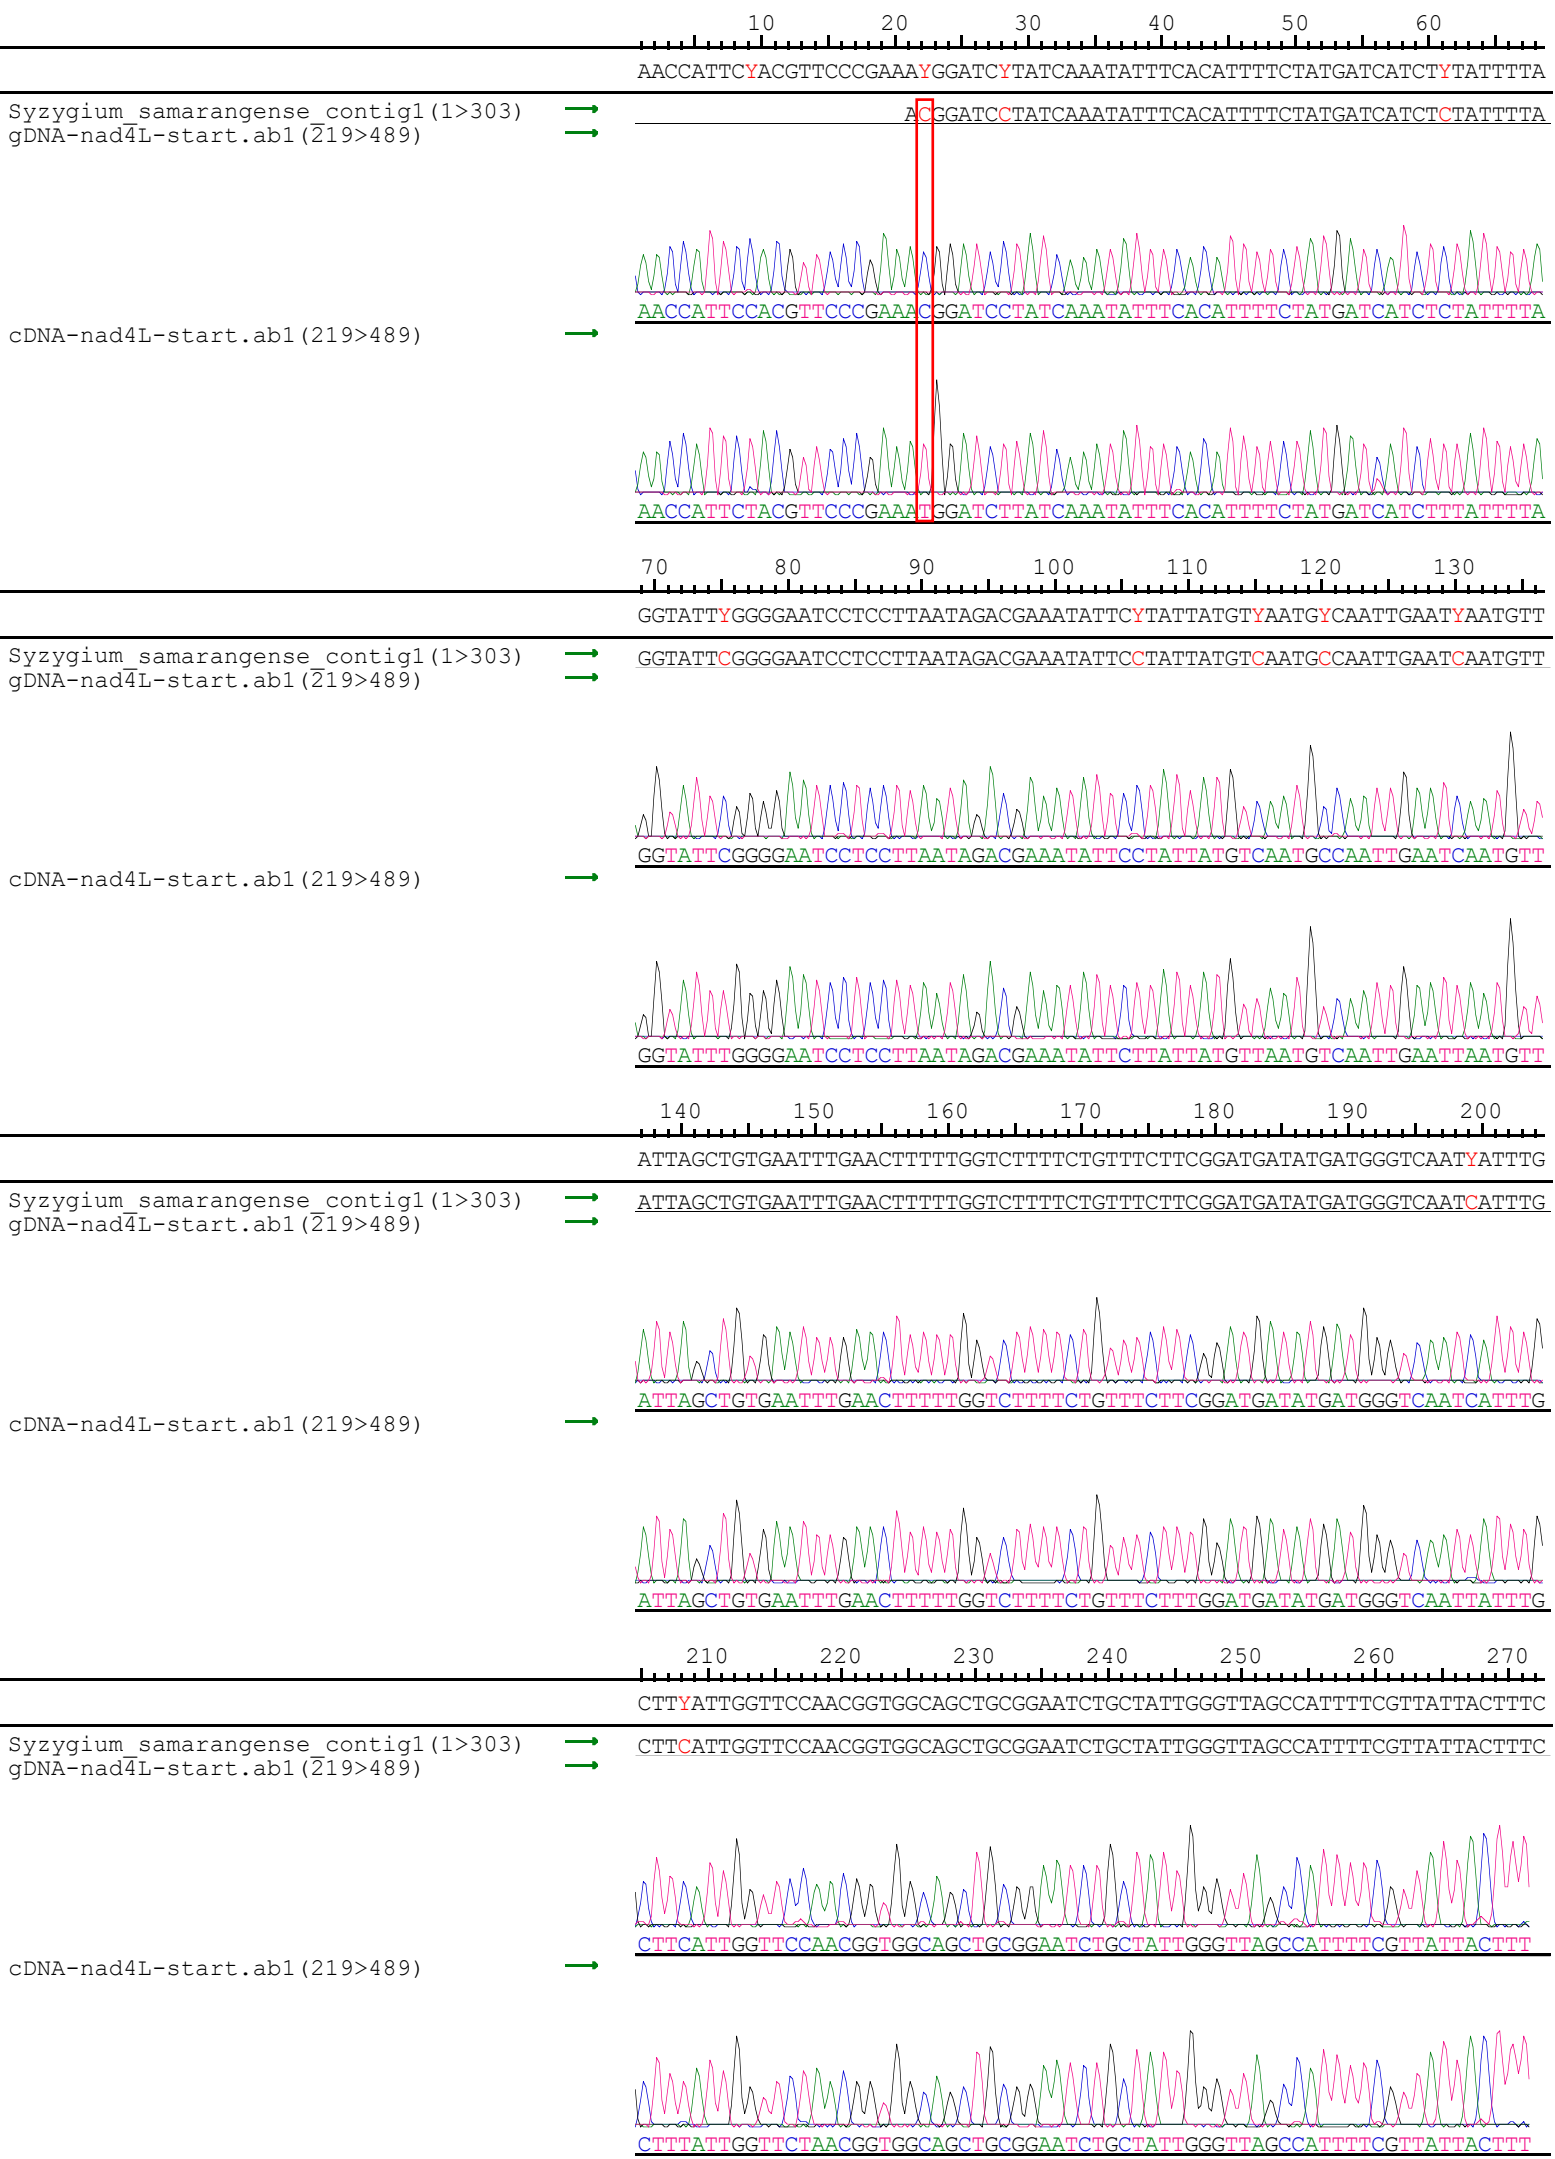

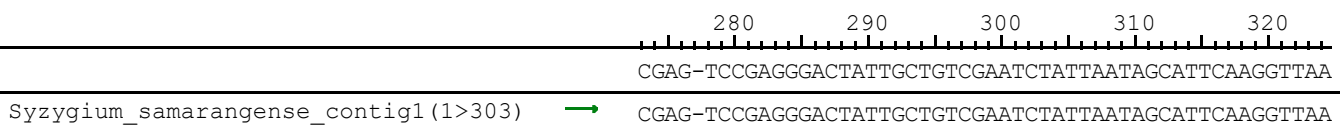

Supplement: Data_Sheet_1.zip [file Data_Sheet_1.zip]

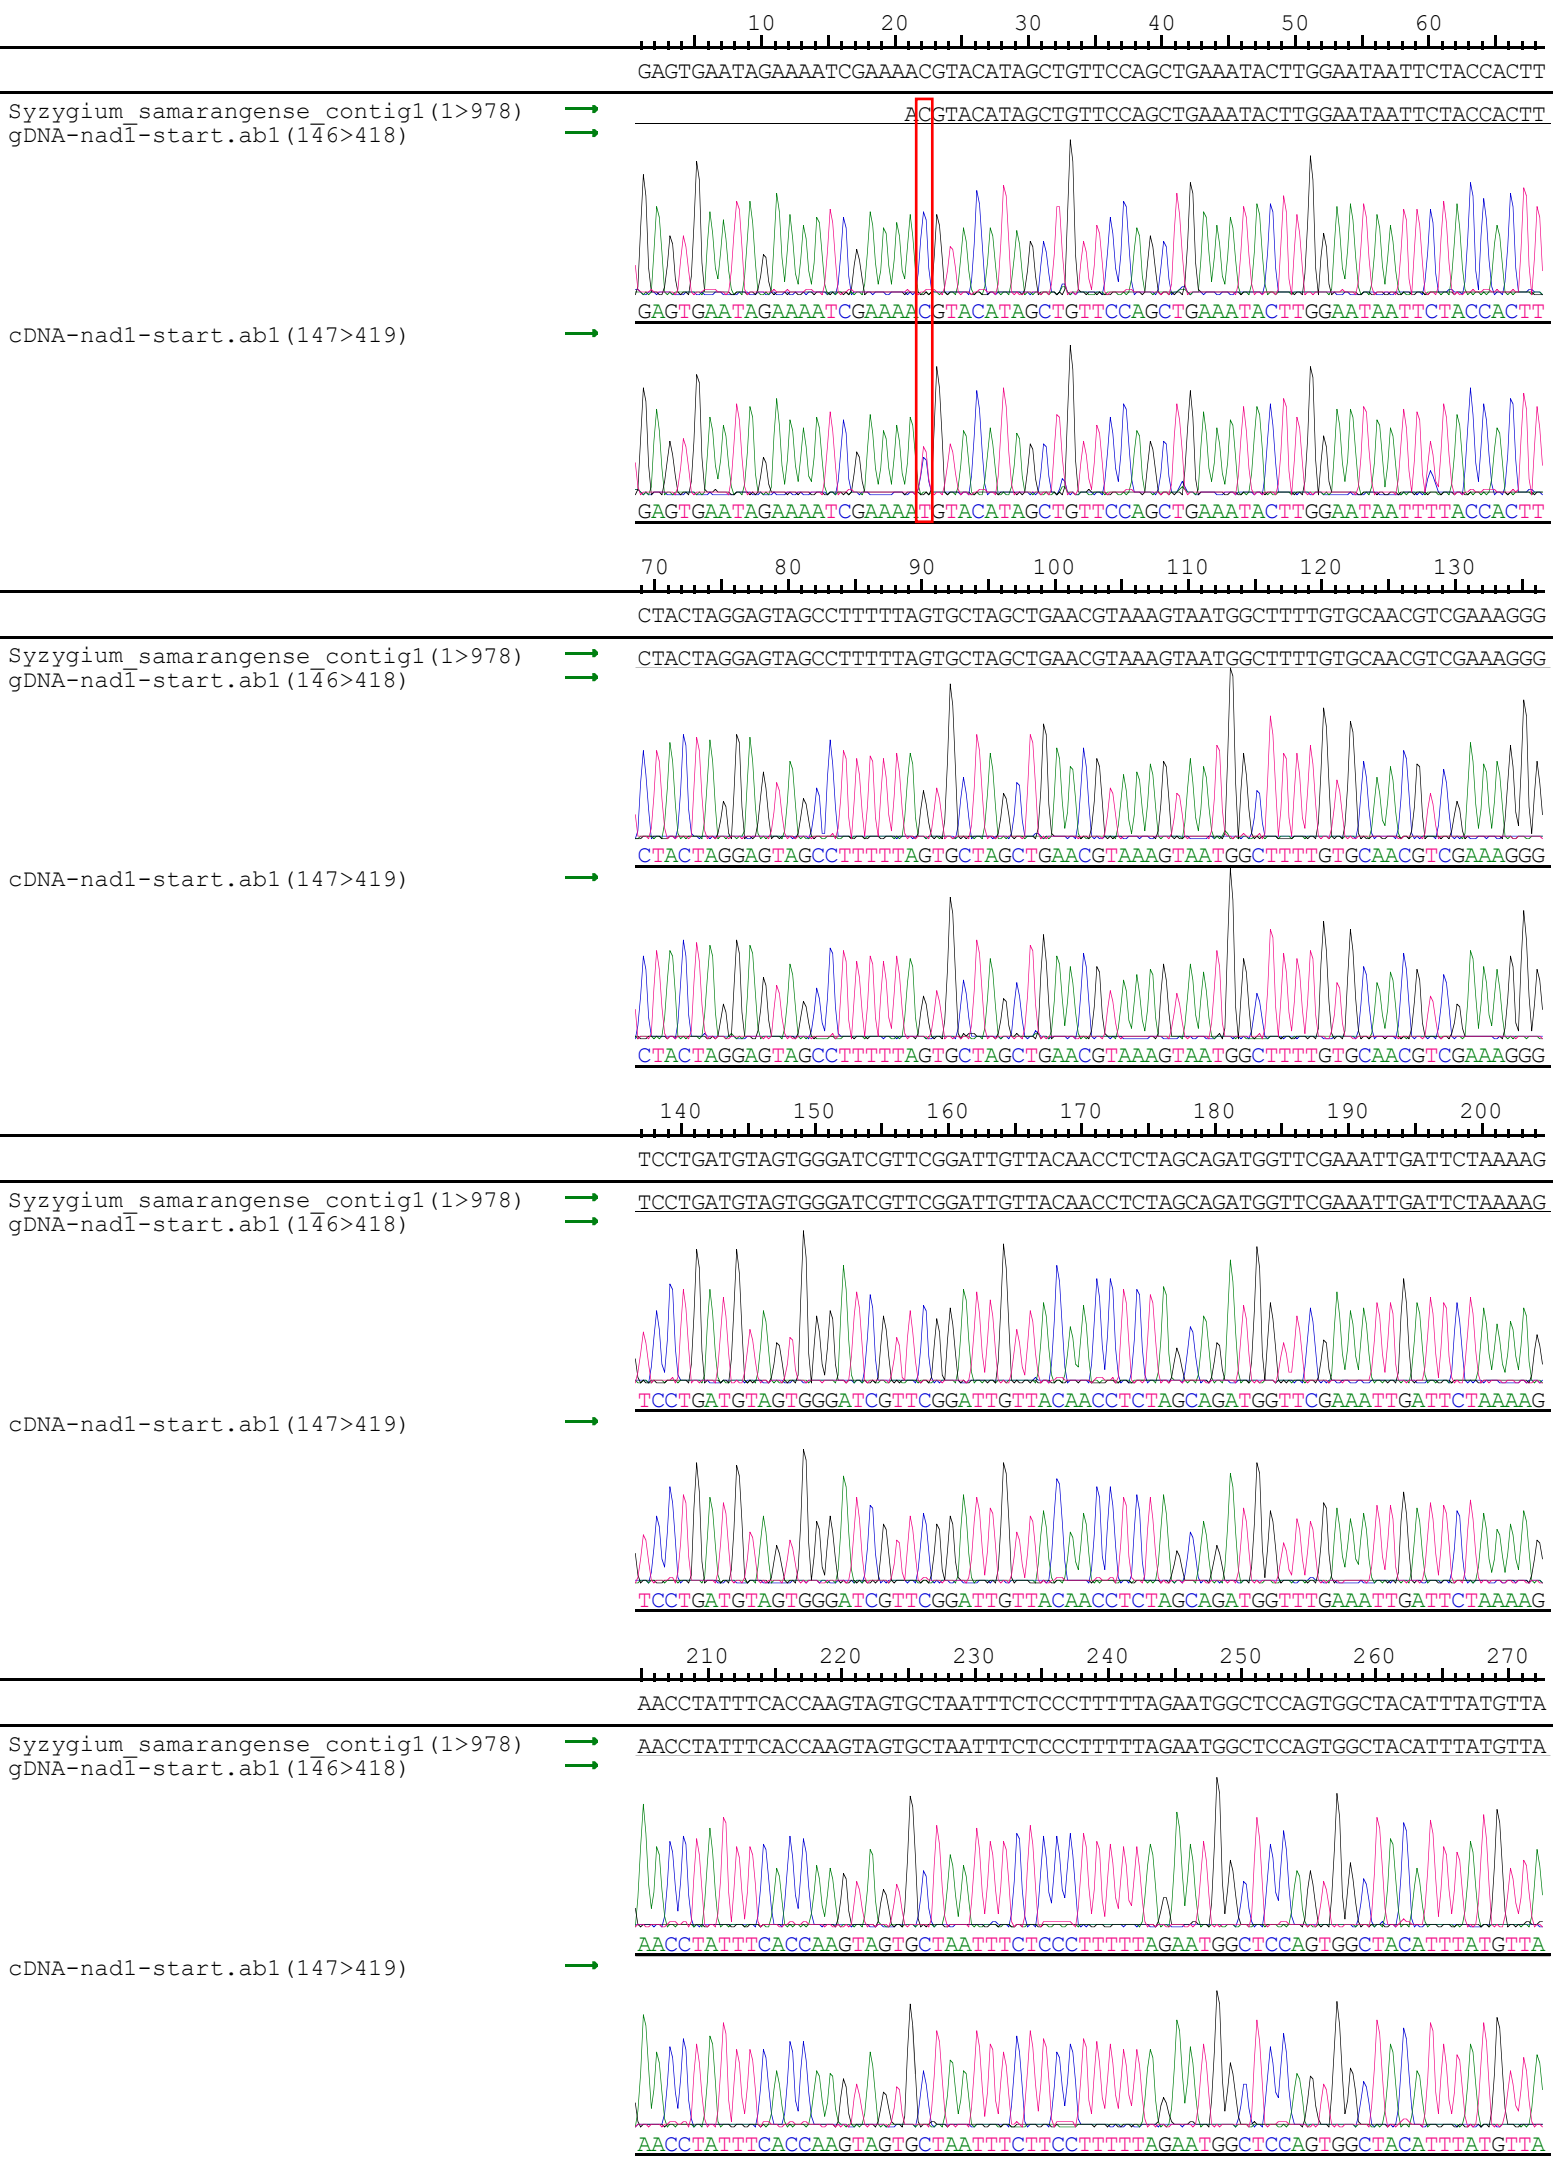

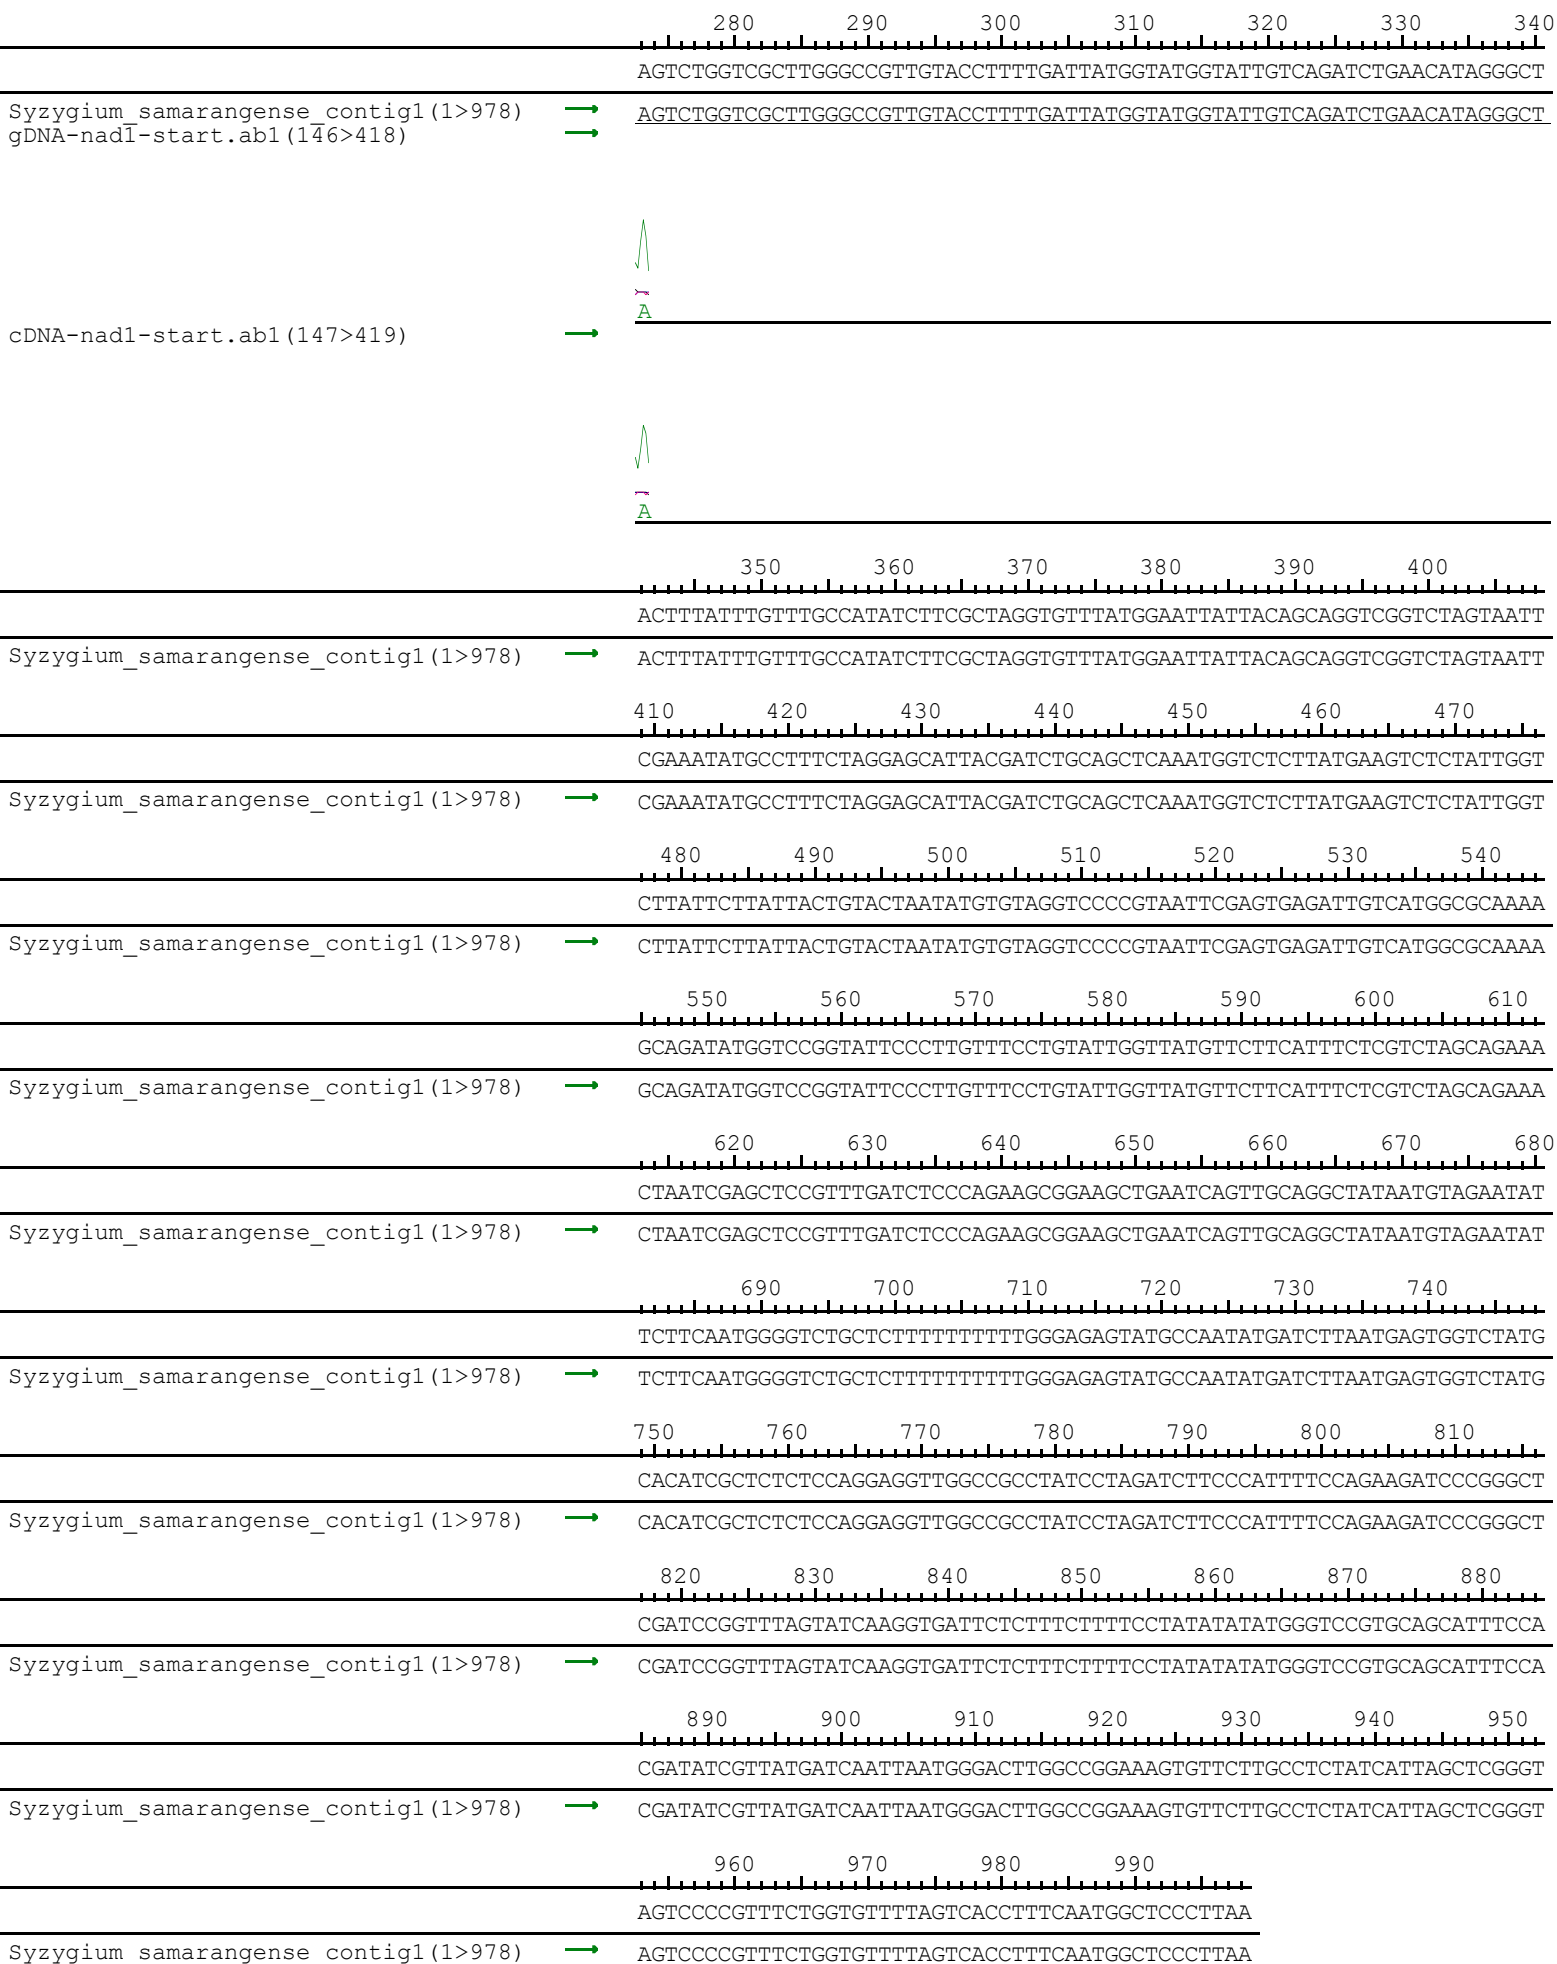

Supplement: Data_Sheet_1.zip [file Data_Sheet_1.zip]
